# Supplementary material for: Sustainable upgrading of biomass: a thermodynamic approach to fine-tuning product selectivity for glycerol oxidation
Source: Royal Society of Chemistry journal article supplement (doi:10.1039/d4cc04967e), 2025-01-01
Supplement: d4cc04967e1.pdf [file d4cc04967e1.pdf]

## Supplementary Information

### Sustainable Upgrading of Biomass: A Thermodynamic Approach to Fine-Tuning Product Selectivity for Glycerol Oxidation

Andrés F. Pérez-Torres<sup>\*a,b</sup>, Heejung Kong<sup>a,b</sup>, Fatwa F. Abdi<sup>c</sup>, Roel van de Krol<sup>a,b</sup>, and Marco Favaro<sup>\*a</sup>

<sup>a</sup> Institute for Solar Fuels, Helmholtz-Zentrum Berlin für Materialien und Energie GmbH, Hahn-Meitner-Platz 1, 14109 Berlin, Germany.

<sup>b</sup> Institut für Chemie, Technische Universität Berlin, Straße des 17. Juni 124, 10623 Berlin, Germany.

<sup>c</sup> School of Energy and Environment, City University of Hong Kong, 83 Tat Chee Avenue, Kowloon, Hong Kong S.A.R., China.

\* Authors to whom correspondence should be addressed: A. F. Pérez-Torres: andres.perez\_torres@helmholtz-berlin.de; M. Favaro: marco.favaro@helmholtz-berlin.de

Table S1. Molecules not present in the database. Their thermodynamic properties were calculated by the GANI method.

| Molecule | Formula     |
|----------|-------------|
| GLAC     | $C_3H_6O_4$ |
| TAC      | $C_3H_4O_5$ |
| HPAC     | $C_3H_4O_4$ |
| MESAC    | $C_3H_2O_5$ |
| GLYX     | $C_2H_2O_3$ |

Table S2. Comparison between Gibbs free energy of formation and enthalpy of formation from thermodynamic model NTRL-NTH ideal gas and thermodynamic data from literature<sup>1</sup>.

|                 |        | NTRL-NTH + GANI + UNIFAC-DMD |                    | literature       |                  |
|-----------------|--------|------------------------------|--------------------|------------------|------------------|
|                 |        | $\Delta_f G$ ideal           | $\Delta_f H$ ideal | $\Delta_f G$ gas | $\Delta_f H$ gas |
| <b>WATER</b>    | kJ/mol | -228.6                       | -241.8             | -228.6           | -241.8           |
| <b>CO2</b>      | kJ/mol | -394.4                       | -393.5             | -394.4           | -393.5           |
| <b>GLY</b>      | kJ/mol | -447.1                       | -577.9             | not available    | -578.0           |
| <b>FAC</b>      | kJ/mol | -351                         | -378.6             | -315.1           | -379.0           |
| <b>GAC</b>      | kJ/mol | -507                         | -585.0             | -504.9           | -583.0           |
| <b>HYDROGEN</b> | kJ/mol | 0                            | 0.0                | 0                | 0.0              |
| <b>OXYGEN</b>   | kJ/mol | 0                            | 0.0                | 0                | 0.0              |
| <b>OXAC</b>     | kJ/mol | -662.4                       | -719.5             | -662.7           | -731.8           |
| <b>AcOH</b>     | kJ/mol | -374.6                       | -392.4             | -374.2           | -432.2           |

Table S3. Gibbs free energy of formation of the different reactants and products, using the different thermodynamic models.

|          |            | Gibbs free energy of formation     |                        |                       |                    |                        |
|----------|------------|------------------------------------|------------------------|-----------------------|--------------------|------------------------|
| Molecule |            | NTRL-NTH +<br>GANI +<br>UNIFAC-DMD | NTRL-<br>HOC +<br>GANI | NTRL-<br>RK +<br>GANI | UNIF-DMD<br>+ GANI | WILS-<br>NTH +<br>GANI |
| H2O      | kJ/mo<br>1 | -237                               | -237                   | -237                  | -237               | -237                   |
| GLY      | kJ/mo<br>1 | -485                               | -485                   | -485                  | -485               | -485                   |
| DHA      | kJ/mo<br>1 | -471                               | 0                      | -471                  | -479               | -479                   |
| GLAD     | kJ/mo<br>1 | -442                               | 0                      | -446                  | -446               | -446                   |
| LAC      | kJ/mo<br>1 | -526                               | -526                   | -526                  | -526               | -526                   |
| GLAC     | kJ/mo<br>1 | -702                               | 0                      | -702                  | -702               | -702                   |
| HPAC     | kJ/mo<br>1 | -693                               | 0                      | -693                  | -693               | -693                   |
| TAC      | kJ/mo<br>1 | -912                               | 0                      | -912                  | -912               | -912                   |
| MESAC    | kJ/mo<br>1 | -885                               | 0                      | -885                  | -885               | -885                   |
| GCAD     | kJ/mo<br>1 | -264                               | -264                   | -264                  | -264               | -264                   |
| AcOH     | kJ/mo<br>1 | -388                               | -388                   | -384                  | -384               | -388                   |
| GAC      | kJ/mo<br>1 | -529                               | -529                   | -529                  | -529               | -529                   |
| GLYX     | kJ/mo<br>1 | -489                               | 0                      | -489                  | -489               | -489                   |
| OXAC     | kJ/mo<br>1 | -689                               | -689                   | -689                  | -689               | -689                   |
| FAC      | kJ/mo<br>1 | -358                               | -363                   | -358                  | -358               | -358                   |
| CO2      | kJ/mo<br>1 | -385                               | -385                   | -385                  | -385               | -385                   |
| O2       | kJ/mo<br>1 | -0.031                             | -0.031                 | -0.031                | -0.031             | -0.031                 |
| H2       | kJ/mo<br>1 | -0.034                             | -0.034                 | -0.034                | -0.034             | -0.031                 |

Table S4. Gibbs free energy of formation at different temperatures

|            |        | $\Delta_f G$ |        |        |        |        |        |        |
|------------|--------|--------------|--------|--------|--------|--------|--------|--------|
|            |        | 25°C         | 30°C   | 40°C   | 50°C   | 60°C   | 70°C   | 80°C   |
| <b>H2O</b> | kJ/mol | -237.2       | -236.3 | -234.7 | -233.2 | -231.6 | -230.1 | -228.5 |
| <b>CO2</b> | kJ/mol | -384.9       | -384.6 | -384.0 | -383.4 | -382.8 | -382.2 | -381.6 |
| <b>GLY</b> | kJ/mol | -485.1       | -482.0 | -476.0 | -470.0 | -464.1 | -458.2 | -452.4 |
| <b>DHA</b> | kJ/mol | -451.2       | -449.5 | -446.2 | -442.8 | -439.3 | -435.7 | -432.1 |

|              |        |        |        |        |        |        |        |        |
|--------------|--------|--------|--------|--------|--------|--------|--------|--------|
| <b>FAC</b>   | kJ/mol | -358.1 | -357.2 | -355.3 | -353.5 | -351.7 | -349.9 | -348.1 |
| <b>GAC</b>   | kJ/mol | -529.2 | -527.1 | -522.9 | -518.7 | -514.6 | -510.4 | -506.3 |
| <b>GCAD</b>  | kJ/mol | -264.1 | -262.4 | -259.0 | -255.6 | -252.2 | -248.9 | -245.6 |
| <b>GLAC</b>  | kJ/mol | -702.0 | -699.4 | -694.1 | -688.8 | -683.6 | -678.5 | -673.3 |
| <b>H2</b>    | kJ/mol | -0.03  | -0.03  | -0.03  | -0.03  | -0.04  | -0.04  | -0.04  |
| <b>O2</b>    | kJ/mol | -0.03  | -0.04  | -0.04  | -0.04  | -0.04  | -0.04  | -0.04  |
| <b>OXAC</b>  | kJ/mol | -688.9 | -687.4 | -684.2 | -681.1 | -678.1 | -675.0 | -672.0 |
| <b>LAC</b>   | kJ/mol | -526.4 | -523.7 | -518.3 | -513.0 | -507.8 | -502.7 | -497.6 |
| <b>AcOH</b>  | kJ/mol | -387.7 | -386.1 | -382.9 | -379.8 | -376.7 | -373.7 | -370.6 |
| <b>TAC</b>   | kJ/mol | -912.0 | -909.4 | -904.3 | -899.3 | -894.3 | -889.3 | -884.4 |
| <b>HPAC</b>  | kJ/mol | -692.5 | -691.3 | -688.8 | -686.4 | -684.0 | -681.6 | -679.3 |
| <b>MESAC</b> | kJ/mol | -888.6 | -886.7 | -882.9 | -879.1 | -875.4 | -871.7 | -868.0 |
| <b>GLYX</b>  | kJ/mol | -488.6 | -487.9 | -486.3 | -484.8 | -483.4 | -481.9 | -480.5 |
| <b>GLAD</b>  | kJ/mol | -445.9 | -445.2 | -443.7 | -442.2 | -440.7 | -439.3 | -437.8 |

Table S5. Reversible potential at different temperatures for the oxidation of glycerol to different products.

|              | E reversible |       |       |       |       |       |       |
|--------------|--------------|-------|-------|-------|-------|-------|-------|
|              | 25 °C        | 30 °C | 40 °C | 50 °C | 60 °C | 70 °C | 80 °C |
| <b>OER</b>   | 1.23         | 1.22  | 1.22  | 1.21  | 1.20  | 1.19  | 1.18  |
| <b>CO2</b>   | 0.03         | 0.03  | 0.02  | 0.01  | 0.01  | 0.00  | -0.01 |
| <b>DHA</b>   | 0.18         | 0.17  | 0.15  | 0.14  | 0.13  | 0.12  | 0.10  |
| <b>FAC</b>   | 0.16         | 0.15  | 0.15  | 0.14  | 0.13  | 0.13  | 0.12  |
| <b>GAC</b>   | 0.10         | 0.09  | 0.09  | 0.09  | 0.08  | 0.08  | 0.07  |
| <b>GCAD</b>  | 0.46         | 0.46  | 0.45  | 0.45  | 0.44  | 0.44  | 0.44  |
| <b>GLAC</b>  | 0.05         | 0.05  | 0.04  | 0.04  | 0.03  | 0.03  | 0.02  |
| <b>OXAC</b>  | 0.15         | 0.15  | 0.14  | 0.14  | 0.13  | 0.13  | 0.12  |
| <b>LAC</b>   | -0.21        | -0.22 | -0.22 | -0.22 | -0.23 | -0.23 | -0.23 |
| <b>AcOH</b>  | -0.50        | -0.50 | -0.51 | -0.52 | -0.52 | -0.53 | -0.54 |
| <b>TAC</b>   | 0.06         | 0.06  | 0.05  | 0.05  | 0.04  | 0.04  | 0.03  |
| <b>HPAC</b>  | 0.05         | 0.05  | 0.04  | 0.03  | 0.02  | 0.01  | 0.00  |
| <b>MESAC</b> | 0.07         | 0.07  | 0.06  | 0.06  | 0.05  | 0.05  | 0.04  |
| <b>GLYX</b>  | 0.14         | 0.14  | 0.13  | 0.12  | 0.11  | 0.10  | 0.10  |
| <b>GLAD</b>  | 0.10         | 0.10  | 0.08  | 0.07  | 0.06  | 0.05  | 0.04  |

Table S6. Standard enthalpy of reaction.

| Reactant | Product   | $\Delta_R H^\circ$<br>(kJ/mol) |
|----------|-----------|--------------------------------|
| H2O      | H2, O2    | 286                            |
| GLY      | GLAD, H2  | 667                            |
| GLY, H2O | GLAC, H2  | 114                            |
| GLY, H2O | TAC, H2   | 197                            |
| GLY      | DHA, H2   | 99                             |
| GLY, H2O | HPAC, H2  | 192                            |
| GLY, H2O | MESAC, H2 | 240                            |
| GLY      | LAC, H2   | -23                            |
| GLY, H2O | GAC, H2   | 202                            |

|          |          |      |
|----------|----------|------|
| GLY, H2O | GLYX, H2 | 574  |
| GLY, H2O | OXAC, H2 | 649  |
| GLY      | AcOH, H2 | -115 |
| GLY, H2O | FAC, H2  | 329  |
| GLY, H2O | CO2, H2  | 331  |
| GLY      | GCAD, H2 | 220  |

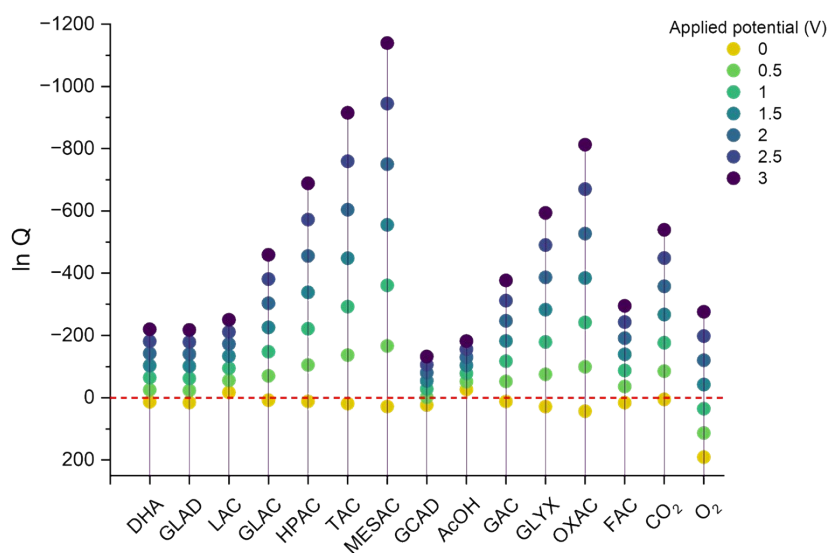

Figure S1. Natural logarithm of the reaction quotient ( $Q$ ) at different applied potentials ( $E_{app}$ ), determined under standard state conditions (i.e., 298.15 K and 1 bar). A more negative  $\ln Q$  indicates a larger displacement of the reaction toward glycerol oxidation reaction (GOR) products. Note that at  $E_{app} = 0$ ,  $Q = K_{eq}$ . Note that  $\ln Q$  as a function of potential is reported in Figure S2.

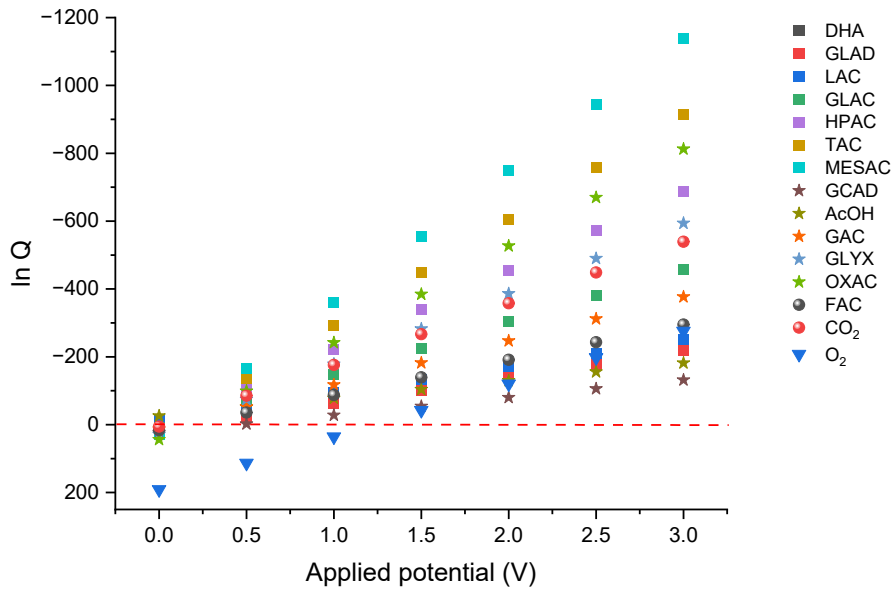

Figure S2. Natural logarithm of the reaction quotient ( $Q$ ) as a function of applied potential, determined under standard state conditions (i.e., 298.15 K and 1 bar). The slope is given by  $-nF/RT$  (or  $-n/0.0257 \text{ V}^{-1}$ ) where  $n$  is the number of electrons transferred during the reaction. A more negative  $\ln Q$  indicates a larger displacement of the reaction toward glycerol oxidation reaction (GOR) products, meaning that different potentials may favour the formation of one product over the others. However, because of the proximity of  $\ln Q$  for the different species at different potentials, it is not possible to obtain a high selectivity towards a specific product from purely thermodynamic considerations. Hence, experimental conditions aiming at tuning the selectivity toward a desired product could be achieved by considering reaction kinetics in combination with the reported information on thermodynamics.

### Supplementary note 1 - Density and viscosity

We calculated the dependence of density and viscosity of the mixture with the concentration of glycerol. To achieve this, we used the empirical models developed by Cheng et. al<sup>2</sup> (for viscosity) and Volk et. al<sup>3</sup> (for density), valid from 0 to 100°C and a glycerol mass fraction from 0-1. The equations of the model for viscosity are:

$$\mu_w = 1.79 * \exp\left(\frac{-1230 * T - T^2}{36100 + 360T}\right) * 0.001 \quad (1)$$

$$\mu_{GLY} = 12100 * \exp\left(\frac{-1233 * T - T^2}{9900 + 70T}\right) * 0.001 \quad (2)$$

$$\mu_{mix} = \mu_{GLY} * \exp(A * \alpha) \quad (3)$$

$$A = \ln\left(\frac{\mu_w}{\mu_{GLY}}\right) \quad (4)$$

$$\alpha = 1 - w_{GLY} + \frac{a * b * w_{GLY} * (1 - w_{GLY})}{a * w_{GLY} + b * (1 - w_{GLY})} \quad (5)$$

$$a = 0.705 - 0.0017 * T \quad (6)$$

$$b = (4.9 + 0.036 * T) * a^{2.5} \quad (7)$$

Where  $\mu_w$ ,  $\mu_{GLY}$  and  $\mu_{mix}$  are the dynamic viscosities of water, glycerol and mixture in Pa\*s, respectively;  $T$  corresponds to temperature in °C,  $A$  is the logarithmic ratio of the viscosities and  $\alpha$  is a weighting factor for the contribution of glycerol viscosity on the viscosity of the solution. For the case of density, the equations are:

$$\rho_w = 1000 * \left(1 - \left|\frac{T - 3.98}{615}\right|^{1.71}\right) \quad (8)$$

$$\rho_{GLY} = 1273 - 0.612 * T \quad (9)$$

$$\rho_{mix} = \kappa * \frac{\rho_w + (\rho_{GLY} - \rho_w)}{1 + \frac{\rho_{GLY}}{\rho_w} * \frac{1}{w_{GLY} - 1}} \quad (10)$$

$$\kappa = 1 + c * \sin(w_{GLY}^{1.31} * \pi)^{0.81} \quad (11)$$

$$c = 1.41 * 10^{-2} - 1.82 * 10^{-4} * T + 1.78 * 10^{-6} * T^2 \quad (12)$$

Where  $\rho_w$ ,  $\rho_{GLY}$  and  $\rho_{mix}$  are the densities of water, glycerol and mixture in kg/m<sup>3</sup>, respectively;  $T$  corresponds to temperature in °C and  $\kappa$  is the volume contraction. This last term is used to improve the accuracy of the model, by considering the decrease in solution volume due to interaction between the involved species<sup>3</sup>.

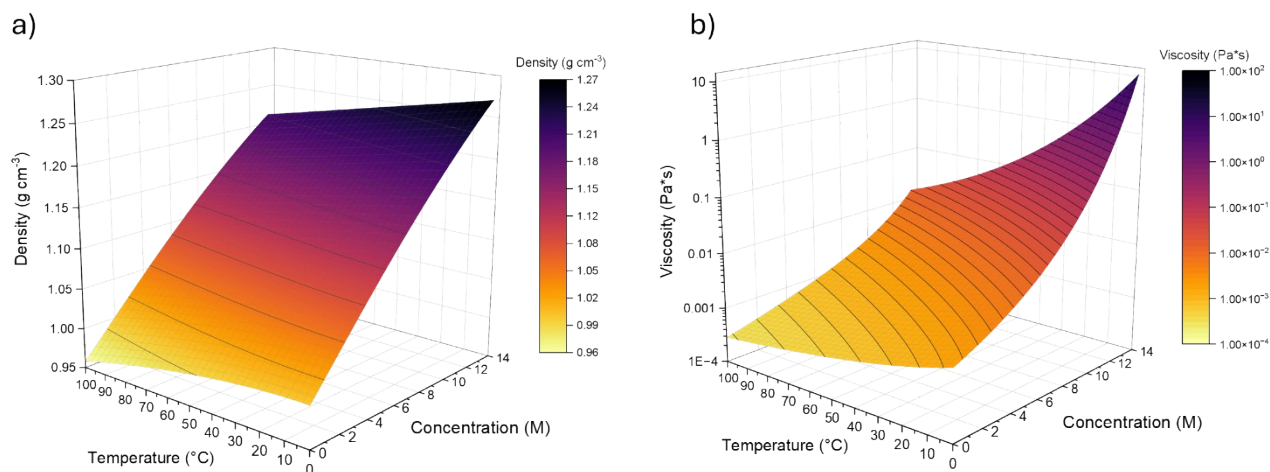

Figure S3. Density and viscosity of glycerol-water mixture as a function of glycerol concentration and temperature.

### Supplementary note 2 - Diffusivity

The diffusion coefficient of the different products was calculated using the semi empirical Wilke-Chang equation (Eq. 13)<sup>4</sup>. This model predicts the diffusion coefficients of solute (2) in solvent (1), neglecting solute-solute molecular interactions (i.e. infinite dilution). In our model, to partially include contributions from solute-solute interaction and the effect of temperature, we used the previously calculated viscosity at each temperature and concentration. To stay within the limits of the high dilution approximation, we used a concentration from 0 to 1M.

$$D_{12} = 7.4 * 10^{-8} * \frac{(\phi * M_1)^{0.5} T}{\mu_1 (V_{Tc,2})^{0.6}} \quad (13)$$

$$V_{Tc,2} = 0.285 * V_{c,2}^{1.048} \quad (14)$$

Where  $D_{12}$  is the binary diffusivity of 1 (solute) in 2 (the solvent) in  $\text{cm}^2/\text{s}$ ,  $\phi$  is the association factor of the solvent (dimensionless, 2.26 for water),  $M_1$  is the molar mass of the solvent in  $\text{g}/\text{mol}$ ,  $T$  is the temperature in  $\text{K}$ ,  $\mu_1$  is the solvent viscosity in  $\text{cP}$  and  $V_{Tc,2}$  is the volume at normal boiling point temperature in  $\text{cm}^3/\text{mol}$ . To calculate  $V_{Tc,2}$ , Eq 14 was used. Here,  $V_{c,2}$  corresponds to the solute critical volume in  $\text{cm}^3/\text{mol}$ , which was obtained from the thermodynamic simulations in ASPEN Plus.

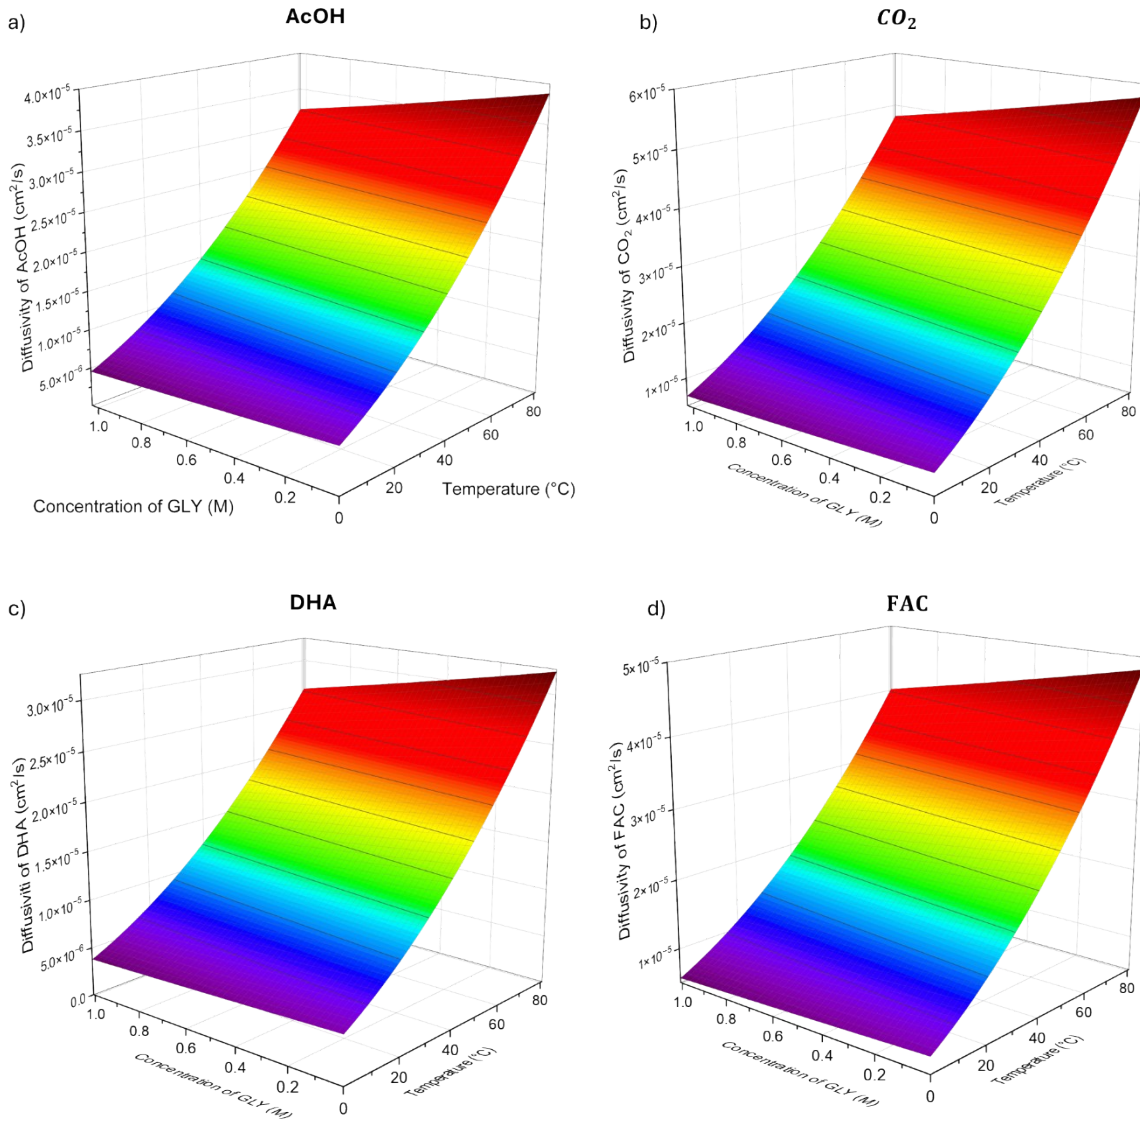



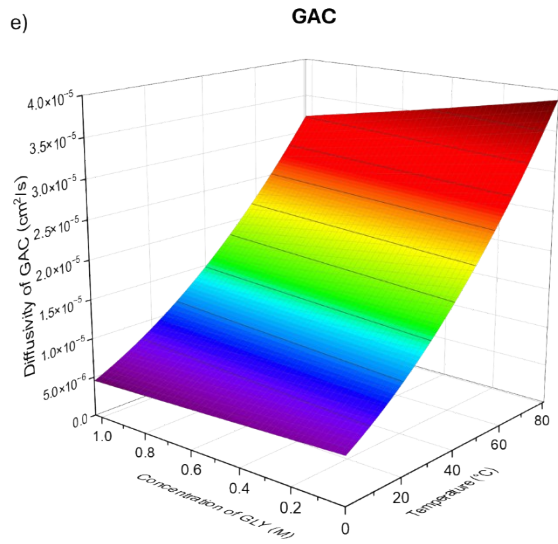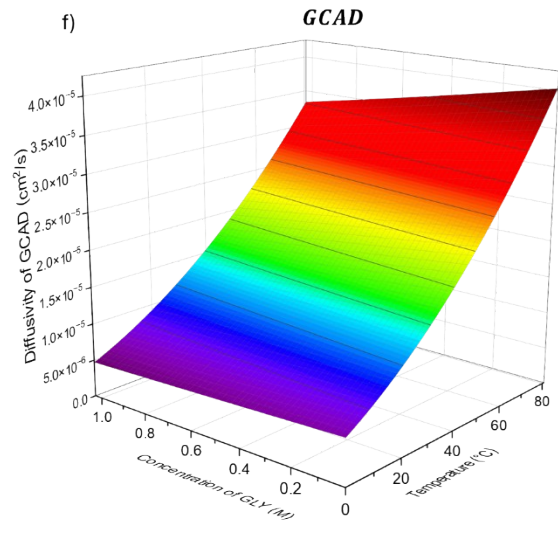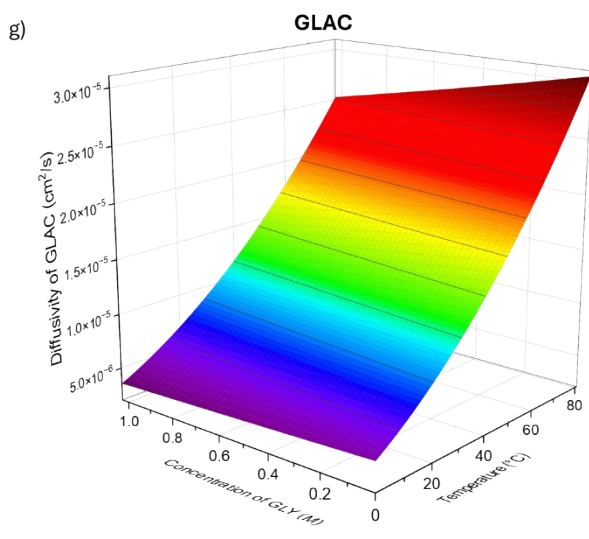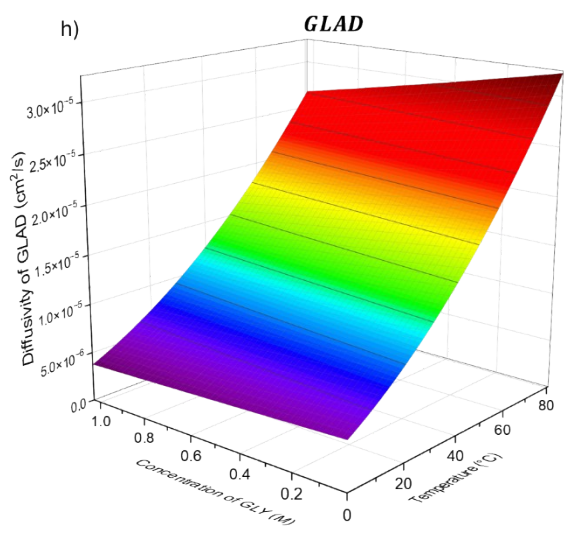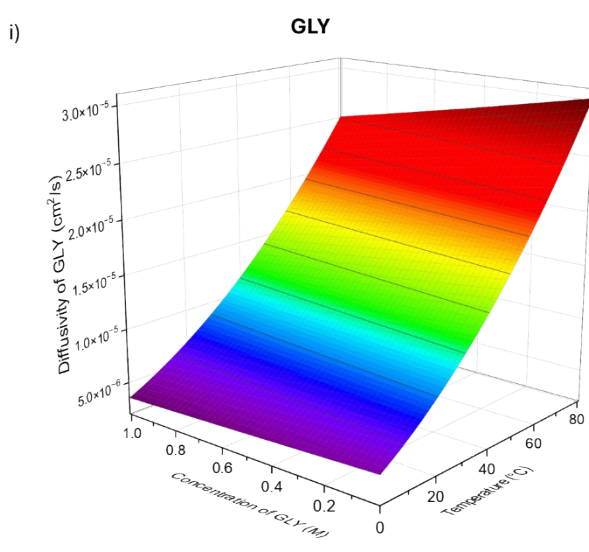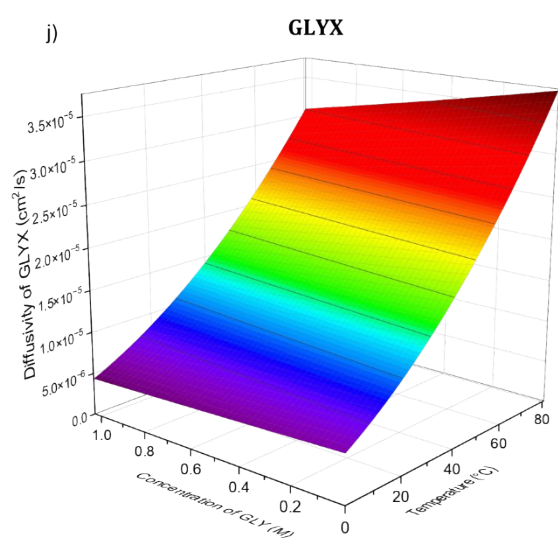

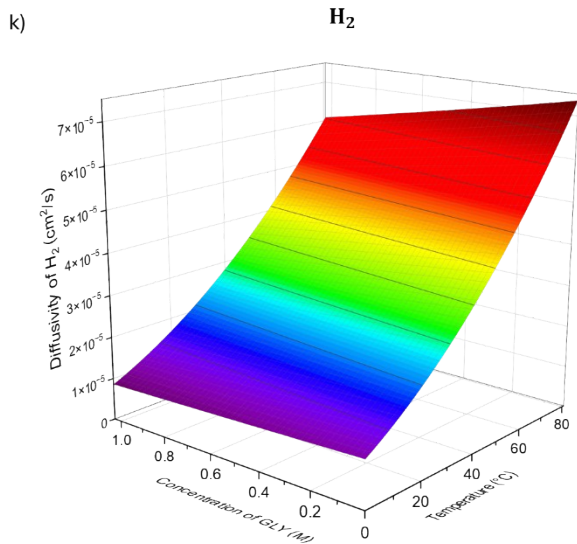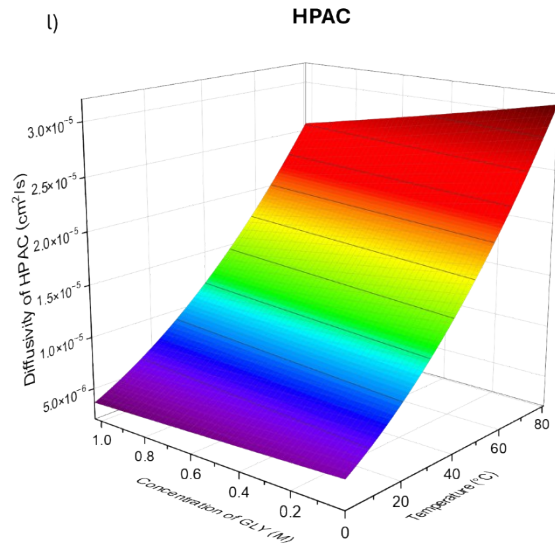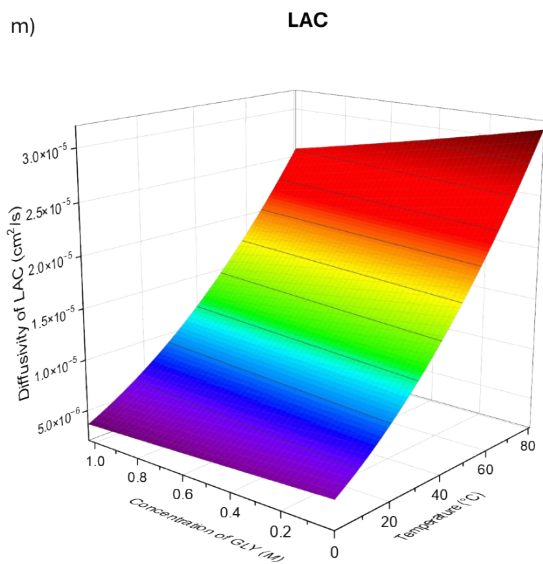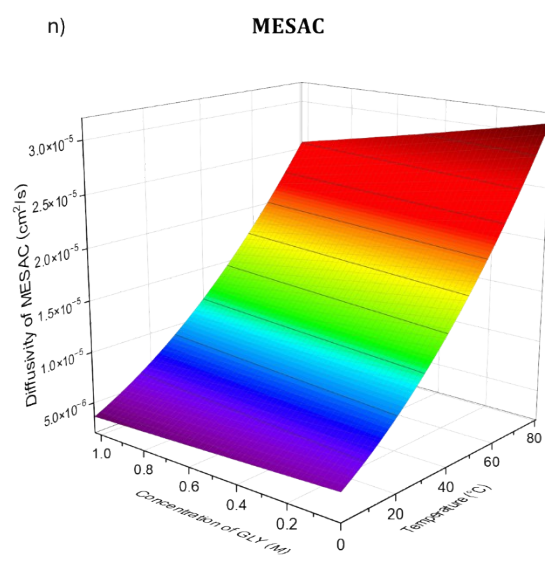

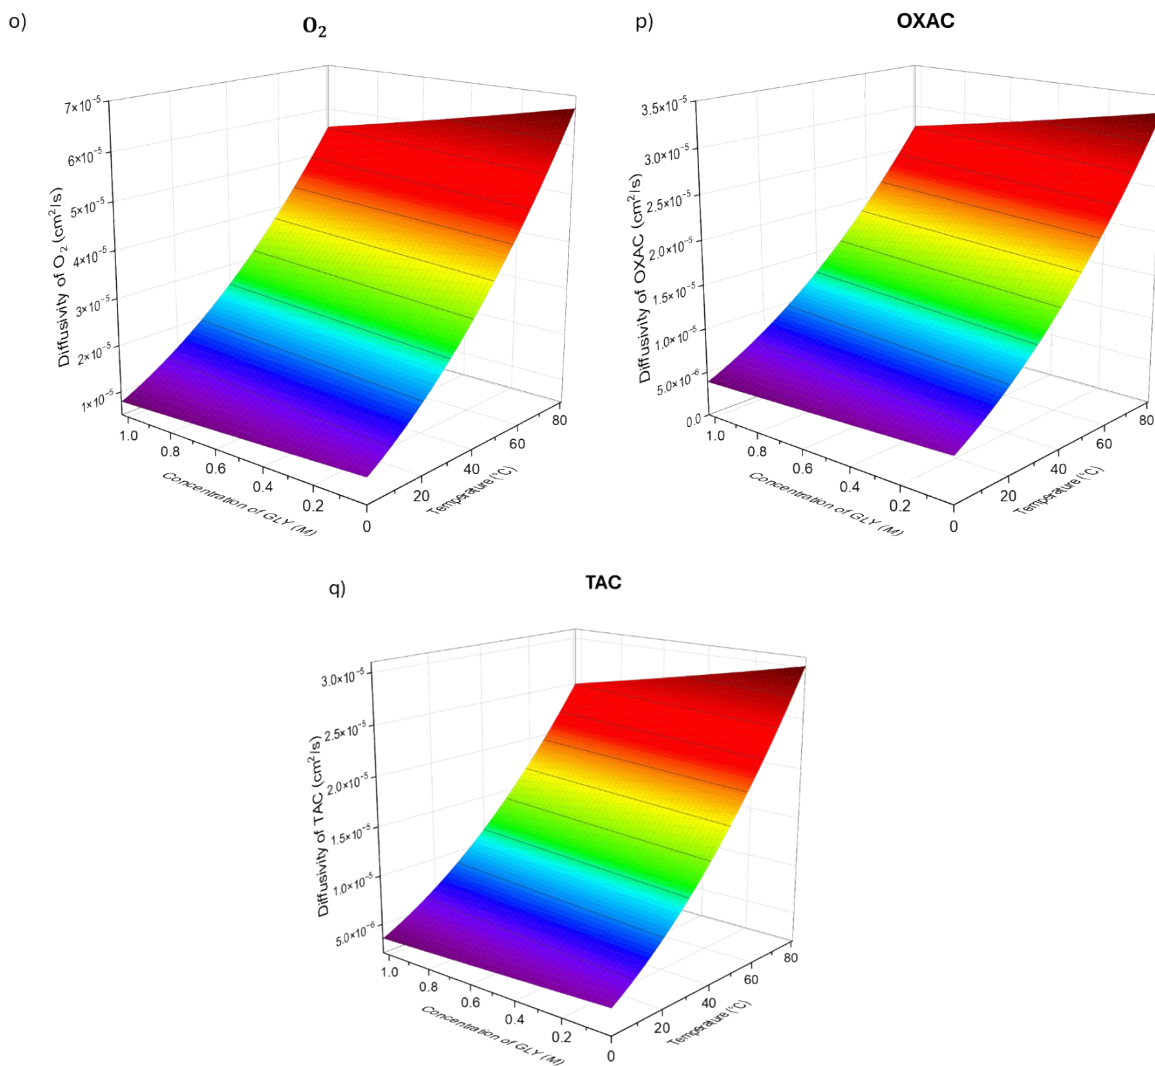

Figure S4. Diffusivity coefficients of GOR and water splitting products from 0 to 1 M, and 0 to 80°C. a) AcOH, b) CO<sub>2</sub>, c) DHA, d) FAC, e) GAC, f) GCAD, g) GLAC, h) GLAD, i) GLY, j) GLYX, k) H<sub>2</sub>, l) HPAC, m) LAC, n) MESAC, o) O<sub>2</sub>, p) OXAC, q) TAC.

#### References:

- 1 W. M. Haynes, Ed., in *CRC Handbook of Chemistry and Physics*, CRC Press, 95th edn., 2014.
- 2 N.-S. Cheng, *Ind. Eng. Chem. Res.*, 2008, **47**, 3285–3288.
- 3 A. Volk and C. J. Kähler, *Exp. Fluids*, 2018, **59**, 75.
- 4 C. R. Wilke and P. Chang, *AIChE J.*, 1955, **1**, 264–270.
