# Supplementary material for: Sustainable upgrading of biomass: a thermodynamic approach to fine-tuning product selectivity for glycerol oxidation
Source: Royal Society of Chemistry journal article supplement (doi:10.1039/d4cc04967e), 2025-01-01
Supplement: d4cc04967e2.zip [file d4cc04967e2.zip]

## Sheet: Sheet1
		Temperature (°C)
		0	1.0101	2.0202	3.0303	4.0404	5.05051	6.06061	7.07071	8.08081	9.09091	10.101	11.1111	12.1212	13.1313	14.1414	15.1515	16.1616	17.1717	18.1818	19.1919	20.202	21.2121	22.2222	23.2323	24.2424	25.2525	26.2626	27.2727	28.2828	29.2929	30.303	31.3131	32.3232	33.3333	34.3434	35.3535	36.3636	37.3737	38.3838	39.3939	40.404	41.4141	42.4242	43.4343	44.4444	45.4545	46.4646	47.4747
Molar concentration of GLY (M)	1.06971e-09	0.00179	0.00172999	0.00167302	0.0016189	0.00156745	0.00151849	0.00147186	0.00142743	0.00138506	0.00134463	0.00130602	0.00126912	0.00123384	0.00120008	0.00116776	0.00113679	0.00110711	0.00107865	0.00105133	0.0010251	0.0009999	0.000975679	0.000952385	0.000929972	0.000908397	0.000887617	0.000867594	0.000848291	0.000829675	0.000811712	0.000794373	0.000777629	0.000761452	0.000745817	0.0007307	0.000716077	0.000701928	0.000688232	0.000674969	0.000662121	0.00064967	0.000637601	0.000625898	0.000614545	0.000603528	0.000592835	0.000582452	0.000572367
	0.0214468	0.00179937	0.001739	0.0016817	0.00162726	0.00157551	0.00152626	0.00147936	0.00143467	0.00139206	0.00135139	0.00131255	0.00127544	0.00123996	0.00120601	0.0011735	0.00114236	0.00111251	0.00108388	0.00105641	0.00103003	0.00100469	0.000980336	0.000956912	0.000934374	0.000912678	0.000891783	0.000871649	0.00085224	0.000833522	0.000815461	0.000798026	0.000781191	0.000764926	0.000749206	0.000734007	0.000719305	0.00070508	0.00069131	0.000677976	0.000665059	0.000652543	0.00064041	0.000628644	0.000617231	0.000606157	0.000595407	0.00058497	0.000574832
	0.0429131	0.00180882	0.0017481	0.00169046	0.0016357	0.00158363	0.00153409	0.00148692	0.00144197	0.00139911	0.0013582	0.00131914	0.00128182	0.00124613	0.00121198	0.00117929	0.00114797	0.00111795	0.00108916	0.00106153	0.00103501	0.00100952	0.000985027	0.000961472	0.000938808	0.000916991	0.00089598	0.000875734	0.000856218	0.000837395	0.000819235	0.000801705	0.000784777	0.000768423	0.000752618	0.000737336	0.000722555	0.000708253	0.000694409	0.000681003	0.000668018	0.000655434	0.000643237	0.000631409	0.000619935	0.000608802	0.000597996	0.000587504	0.000577313
	0.0643991	0.00181836	0.00175727	0.00169928	0.0016442	0.00159183	0.00154199	0.00149455	0.00144933	0.00140622	0.00136507	0.00132578	0.00128824	0.00125235	0.001218	0.00118512	0.00115362	0.00112343	0.00109448	0.00106669	0.00104001	0.00101439	0.000989754	0.000966065	0.000943274	0.000921335	0.000900206	0.000879848	0.000860223	0.000841297	0.000823036	0.00080541	0.000788389	0.000771945	0.000756054	0.000740689	0.000725827	0.000711448	0.000697529	0.000684051	0.000670996	0.000658345	0.000646082	0.000634191	0.000622657	0.000611465	0.000600602	0.000590054	0.00057981
	0.0859049	0.00182797	0.00176652	0.00170819	0.00165277	0.00160009	0.00154996	0.00150223	0.00145675	0.00141338	0.001372	0.00133248	0.00129472	0.00125861	0.00122407	0.001191	0.00115932	0.00112896	0.00109984	0.00107189	0.00104506	0.00101929	0.000994515	0.000970693	0.000947774	0.000925711	0.000904464	0.000883992	0.000864258	0.000845226	0.000826864	0.000809141	0.000792026	0.000775492	0.000759513	0.000744064	0.000729122	0.000714664	0.00070067	0.000687119	0.000673994	0.000661275	0.000648946	0.000636992	0.000625396	0.000614145	0.000603224	0.000592621	0.000582323
	0.107431	0.00183767	0.00177585	0.00171716	0.00166142	0.00160842	0.00155799	0.00150998	0.00146423	0.00142061	0.00137898	0.00133923	0.00130125	0.00126493	0.00123019	0.00119692	0.00116506	0.00113452	0.00110523	0.00107713	0.00105015	0.00102423	0.000999312	0.000975355	0.000952306	0.000930119	0.000908752	0.000888166	0.000868321	0.000849184	0.000830719	0.000812898	0.000795688	0.000779063	0.000762997	0.000747463	0.000732439	0.000717903	0.000703832	0.000690208	0.000677012	0.000664225	0.00065183	0.000639811	0.000628154	0.000616842	0.000605864	0.000595204	0.000584852
	0.128976	0.00184745	0.00178526	0.00172622	0.00167014	0.00161682	0.00156609	0.0015178	0.00147177	0.00142789	0.00138602	0.00134603	0.00130783	0.0012713	0.00123635	0.0012029	0.00117085	0.00114013	0.00111067	0.00108241	0.00105527	0.0010292	0.00100415	0.000980052	0.000956872	0.00093456	0.000913072	0.00089237	0.000872414	0.000853169	0.000834602	0.000816681	0.000799376	0.00078266	0.000766504	0.000750885	0.000735779	0.000721163	0.000707016	0.000693318	0.00068005	0.000667194	0.000654732	0.000642649	0.000630929	0.000619557	0.00060852	0.000597804	0.000587397
	0.150541	0.00185732	0.00179474	0.00173535	0.00167893	0.00162529	0.00157426	0.00152567	0.00147938	0.00143523	0.00139311	0.00135289	0.00131446	0.00127772	0.00124256	0.00120891	0.00117668	0.00114578	0.00111616	0.00108773	0.00106043	0.00103421	0.00100901	0.000984783	0.000961471	0.000939033	0.000917424	0.000896604	0.000876536	0.000857183	0.000838513	0.000820492	0.00080309	0.000786281	0.000770036	0.000754331	0.000739142	0.000724446	0.000710222	0.000696449	0.000683109	0.000670183	0.000657654	0.000645506	0.000633723	0.00062229	0.000611194	0.000600421	0.000589959
	0.172127	0.00186728	0.00180432	0.00174456	0.0016878	0.00163384	0.0015825	0.00153362	0.00148704	0.00144264	0.00140026	0.0013598	0.00132115	0.00128419	0.00124883	0.00121498	0.00118256	0.00115148	0.00112168	0.00109309	0.00106563	0.00103926	0.00101392	0.00098955	0.000966105	0.000943538	0.000921807	0.000900869	0.000880688	0.000861227	0.000842451	0.000824329	0.000806831	0.000789928	0.000773593	0.000757801	0.000742528	0.000727751	0.000713449	0.000699601	0.000686188	0.000673192	0.000660595	0.000648381	0.000636535	0.000625041	0.000613885	0.000603055	0.000592537
	0.193732	0.00187732	0.00181397	0.00175385	0.00169674	0.00164245	0.0015908	0.00154163	0.00149478	0.0014501	0.00140747	0.00136677	0.00132789	0.00129071	0.00125514	0.00122109	0.00118848	0.00115722	0.00112725	0.00109849	0.00107087	0.00104435	0.00101886	0.000994353	0.000970773	0.000948078	0.000926222	0.000905166	0.00088487	0.000865299	0.000846417	0.000828194	0.000810598	0.0007936	0.000777175	0.000761295	0.000745938	0.000731079	0.000716698	0.000702775	0.000689288	0.000676221	0.000663556	0.000651276	0.000639365	0.00062781	0.000616594	0.000605706	0.000595131
	0.215358	0.00188744	0.00182371	0.00176322	0.00170576	0.00165114	0.00159918	0.00154971	0.00150257	0.00145763	0.00141474	0.0013738	0.00133468	0.00129728	0.0012615	0.00122725	0.00119445	0.00116301	0.00113286	0.00110393	0.00107616	0.00104948	0.00102384	0.000999191	0.000975476	0.00095265	0.00093067	0.000909494	0.000889083	0.0008694	0.000850412	0.000832086	0.000814391	0.000797299	0.000780781	0.000764814	0.000749371	0.00073443	0.00071997	0.00070597	0.000692409	0.000679271	0.000666537	0.00065419	0.000642215	0.000630597	0.000619321	0.000608374	0.000597743
	0.237003	0.00189766	0.00183353	0.00177267	0.00171486	0.00165991	0.00160763	0.00155785	0.00151043	0.00146521	0.00142207	0.00138088	0.00134153	0.00130391	0.00126792	0.00123346	0.00120046	0.00116884	0.00113851	0.00110941	0.00108148	0.00105465	0.00102886	0.00100407	0.000980214	0.000957257	0.000935151	0.000913853	0.000893326	0.000873532	0.000854436	0.000836006	0.000818212	0.000801023	0.000784413	0.000768356	0.000752828	0.000737804	0.000723264	0.000709186	0.000695552	0.000682341	0.000669537	0.000657123	0.000645083	0.000633402	0.000622065	0.000611059	0.000600371
	0.258669	0.00190796	0.00184344	0.0017822	0.00172403	0.00166874	0.00161614	0.00156607	0.00151835	0.00147286	0.00142946	0.00138802	0.00134843	0.00131059	0.00127438	0.00123972	0.00120653	0.00117471	0.00114421	0.00111494	0.00108684	0.00105985	0.00103392	0.00100898	0.000984988	0.000961898	0.000939665	0.000918245	0.0008976	0.000877693	0.000858489	0.000839955	0.000822059	0.000804774	0.000788071	0.000771924	0.000756309	0.000741202	0.000726581	0.000712425	0.000698715	0.000685432	0.000672558	0.000660076	0.000647971	0.000636226	0.000624828	0.000613763	0.000603017
	0.280355	0.00191836	0.00185343	0.00179181	0.00173329	0.00167766	0.00162473	0.00157435	0.00152634	0.00148058	0.00143691	0.00139522	0.0013554	0.00131732	0.0012809	0.00124603	0.00121264	0.00118064	0.00114995	0.00112051	0.00109224	0.0010651	0.00103901	0.00101393	0.000989797	0.000966574	0.000944212	0.000922669	0.000901906	0.000881885	0.000862571	0.000843931	0.000825935	0.000808552	0.000791754	0.000775517	0.000759814	0.000744623	0.00072992	0.000715686	0.0007019	0.000688544	0.000675599	0.000663049	0.000650877	0.000639069	0.000627609	0.000616483	0.00060568
	0.302061	0.00192885	0.00186351	0.00180151	0.00174262	0.00168664	0.00163339	0.0015827	0.0015344	0.00148836	0.00144443	0.00140248	0.00136241	0.00132411	0.00128746	0.00125239	0.0012188	0.00118661	0.00115574	0.00112612	0.00109769	0.00107038	0.00104414	0.00101891	0.000994643	0.000971284	0.000948793	0.000927125	0.000906243	0.000886107	0.000866682	0.000847936	0.000829838	0.000812356	0.000795464	0.000779135	0.000763344	0.000748067	0.000733283	0.00071897	0.000705107	0.000691677	0.000678661	0.000666042	0.000653803	0.00064193	0.000630408	0.000619222	0.00060836
	0.323787	0.00193943	0.00187368	0.00181129	0.00175204	0.00169571	0.00164213	0.00159112	0.00154253	0.0014962	0.001452	0.0014098	0.00136949	0.00133095	0.00129409	0.0012588	0.00122501	0.00119262	0.00116157	0.00113178	0.00110318	0.00107571	0.00104931	0.00102394	0.000999525	0.00097603	0.000953408	0.000931615	0.000910611	0.00089036	0.000870824	0.000851971	0.000833768	0.000816187	0.0007992	0.000782778	0.000766898	0.000751536	0.000736669	0.000722276	0.000708336	0.000694832	0.000681743	0.000669055	0.000656749	0.000644811	0.000633225	0.000621979	0.000611058
	0.345534	0.0019501	0.00188394	0.00182116	0.00176153	0.00170486	0.00165094	0.00159962	0.00155072	0.00150411	0.00145964	0.00141718	0.00137662	0.00133785	0.00130076	0.00126526	0.00123127	0.00119869	0.00116745	0.00113748	0.00110871	0.00108108	0.00105453	0.001029	0.00100444	0.000980812	0.000958057	0.000936138	0.000915013	0.000894644	0.000874995	0.000856034	0.000837728	0.000820046	0.000802962	0.000786447	0.000770478	0.000755029	0.000740078	0.000725605	0.000711587	0.000698007	0.000684847	0.000672088	0.000659714	0.00064771	0.000636062	0.000624754	0.000613773
	0.3673	0.00196087	0.00189429	0.00183111	0.00177111	0.00171408	0.00165983	0.00160818	0.00155899	0.00151208	0.00146734	0.00142462	0.00138381	0.0013448	0.00130749	0.00127178	0.00123757	0.0012048	0.00117337	0.00114322	0.00111428	0.00108649	0.00105978	0.0010341	0.0010094	0.000985629	0.000962742	0.000940694	0.000919446	0.000898959	0.000879197	0.000860127	0.000841715	0.000823933	0.000806751	0.000790142	0.000774082	0.000758546	0.000743511	0.000728956	0.000714861	0.000701205	0.000687971	0.000675141	0.000662699	0.00065063	0.000638917	0.000627547	0.000616507
	0.389088	0.00197174	0.00190473	0.00184115	0.00178077	0.00172338	0.00166879	0.00161682	0.00156732	0.00152012	0.0014751	0.00143212	0.00139106	0.00135181	0.00131427	0.00127834	0.00124393	0.00121096	0.00117934	0.00114901	0.0011199	0.00109194	0.00106507	0.00103924	0.00101439	0.000990483	0.000967461	0.000945284	0.000923912	0.000903306	0.00088343	0.000864249	0.000845732	0.000827847	0.000810567	0.000793864	0.000777712	0.000762088	0.000746968	0.000732331	0.000718157	0.000704425	0.000691117	0.000678216	0.000665705	0.000653568	0.000641791	0.000630359	0.000619258
	0.410895	0.0019827	0.00191527	0.00185128	0.00179052	0.00173276	0.00167783	0.00162554	0.00157572	0.00152823	0.00148293	0.00143968	0.00139837	0.00135888	0.00132111	0.00128496	0.00125034	0.00121717	0.00118536	0.00115485	0.00112556	0.00109743	0.0010704	0.00104442	0.00101943	0.000995373	0.000972216	0.000949909	0.000928412	0.000907686	0.000887694	0.000868402	0.000849777	0.00083179	0.00081441	0.000797612	0.000781368	0.000765655	0.000750449	0.00073573	0.000721475	0.000707666	0.000694284	0.000681311	0.000668731	0.000656527	0.000644684	0.000633189	0.000622028
	0.432723	0.00199376	0.0019259	0.0018615	0.00180035	0.00174223	0.00168695	0.00163432	0.0015842	0.00153641	0.00149083	0.00144731	0.00140574	0.00136601	0.00132801	0.00129163	0.0012568	0.00122343	0.00119143	0.00116073	0.00113126	0.00110297	0.00107578	0.00104964	0.0010245	0.0010003	0.000977006	0.000954568	0.000932945	0.000912097	0.000891989	0.000872584	0.000853852	0.000835761	0.000818281	0.000801386	0.000785049	0.000769247	0.000753955	0.000739152	0.000724817	0.00071093	0.000697473	0.000684427	0.000671777	0.000659505	0.000647597	0.000636039	0.000624816
	0.454571	0.00200492	0.00193662	0.00187181	0.00181027	0.00175178	0.00169614	0.00164319	0.00159274	0.00154466	0.00149879	0.001455	0.00141317	0.00137319	0.00133496	0.00129836	0.00126332	0.00122974	0.00119754	0.00116666	0.00113701	0.00110854	0.00108119	0.0010549	0.0010296	0.00100527	0.000981833	0.000959262	0.000937511	0.000916541	0.000896315	0.000876798	0.000857956	0.00083976	0.00082218	0.000805187	0.000788757	0.000772864	0.000757485	0.000742598	0.000728182	0.000714216	0.000700683	0.000687565	0.000674843	0.000662503	0.000650529	0.000638907	0.000627622
	0.47644	0.00201618	0.00194743	0.00188221	0.00182027	0.00176141	0.00170542	0.00165213	0.00160136	0.00155297	0.00150682	0.00146275	0.00142067	0.00138044	0.00134196	0.00130514	0.00126988	0.00123609	0.0012037	0.00117263	0.00114281	0.00111417	0.00108665	0.0010602	0.00103475	0.00101027	0.000986696	0.000963991	0.000942112	0.000921018	0.000900674	0.000881042	0.000862091	0.000843789	0.000826106	0.000809016	0.000792491	0.000776507	0.00076104	0.000746068	0.00073157	0.000717525	0.000703916	0.000690724	0.000677931	0.000665522	0.000653481	0.000641794	0.000630447
	0.498329	0.00202754	0.00195835	0.0018927	0.00183036	0.00177112	0.00171477	0.00166114	0.00161006	0.00156136	0.00151491	0.00147057	0.00142822	0.00138774	0.00134903	0.00131198	0.0012765	0.00124251	0.00120991	0.00117865	0.00114865	0.00111983	0.00109215	0.00106554	0.00103994	0.00101531	0.000991596	0.000968756	0.000946747	0.000925529	0.000905064	0.000885317	0.000866255	0.000847847	0.000830061	0.000812872	0.000796252	0.000780176	0.00076462	0.000749562	0.000734982	0.000720857	0.000707171	0.000693904	0.00068104	0.000668561	0.000656453	0.000644701	0.000633291
	0.520239	0.002039	0.00196936	0.00190329	0.00184054	0.00178092	0.00172421	0.00167024	0.00161882	0.00156982	0.00152308	0.00147846	0.00143584	0.00139511	0.00135615	0.00131887	0.00128317	0.00124897	0.00121618	0.00118472	0.00115453	0.00112554	0.00109769	0.00107092	0.00104517	0.00102039	0.000996533	0.000973557	0.000951417	0.000930073	0.000909487	0.000889624	0.00087045	0.000851934	0.000834045	0.000816756	0.000800039	0.00078387	0.000768225	0.000753081	0.000738417	0.000724213	0.000710448	0.000697107	0.000684169	0.000671621	0.000659445	0.000647627	0.000636153
	0.54217	0.00205057	0.00198047	0.00191397	0.00185082	0.0017908	0.00173373	0.00167941	0.00162767	0.00157835	0.00153131	0.00148641	0.00144352	0.00140253	0.00136333	0.00132582	0.0012899	0.00125548	0.00122249	0.00119084	0.00116047	0.0011313	0.00110328	0.00107634	0.00105043	0.00102551	0.00100151	0.000978394	0.000956122	0.000934651	0.000913943	0.000893963	0.000874676	0.000856051	0.000838057	0.000820667	0.000803854	0.000787591	0.000771856	0.000756625	0.000741877	0.000727591	0.000713749	0.000700331	0.000687321	0.000674701	0.000662457	0.000650573	0.000639035
	0.564121	0.00206224	0.00199168	0.00192474	0.00186118	0.00180078	0.00174333	0.00168866	0.00163659	0.00158695	0.00153961	0.00149443	0.00145127	0.00141002	0.00137057	0.00133282	0.00129668	0.00126205	0.00122885	0.00119701	0.00116645	0.0011371	0.00110891	0.00108181	0.00105574	0.00103066	0.00100652	0.000983268	0.000960862	0.000939263	0.000918432	0.000898334	0.000878933	0.000860198	0.000842099	0.000824607	0.000807696	0.000791339	0.000775512	0.000760193	0.00074536	0.000730993	0.000717071	0.000703577	0.000690493	0.000677803	0.00066549	0.000653539	0.000641937
	0.586092	0.00207401	0.00200299	0.00193561	0.00187163	0.00181084	0.00175302	0.00169799	0.00164558	0.00159563	0.00154799	0.00150251	0.00145908	0.00141757	0.00137787	0.00133989	0.00130352	0.00126867	0.00123526	0.00120322	0.00117247	0.00114295	0.00111458	0.00108731	0.00106109	0.00103586	0.00101157	0.000988178	0.000965638	0.00094391	0.000922955	0.000902737	0.000883221	0.000864376	0.00084617	0.000828576	0.000811565	0.000795113	0.000779195	0.000763787	0.000748869	0.000734419	0.000720417	0.000706846	0.000693688	0.000680925	0.000668543	0.000656525	0.000644857
	0.608084	0.0020859	0.00201441	0.00194658	0.00188218	0.00182099	0.00176279	0.00170741	0.00165466	0.00160438	0.00155643	0.00151067	0.00146696	0.00142518	0.00138523	0.00134701	0.00131041	0.00127534	0.00124173	0.00120949	0.00117855	0.00114884	0.0011203	0.00109286	0.00106648	0.0010411	0.00101666	0.000993127	0.000970451	0.000948592	0.000927511	0.000907172	0.000887541	0.000868584	0.000850271	0.000832573	0.000815463	0.000798914	0.000782903	0.000767406	0.000752402	0.000737868	0.000723787	0.000710138	0.000696905	0.000684069	0.000671617	0.000659531	0.000647798
	0.630097	0.00209789	0.00202592	0.00195765	0.00189282	0.00183123	0.00177265	0.0017169	0.00166381	0.00161321	0.00156495	0.00151889	0.0014749	0.00143286	0.00139266	0.00135419	0.00131736	0.00128207	0.00124825	0.00121581	0.00118467	0.00115478	0.00112606	0.00109846	0.00107191	0.00104637	0.00102179	0.000998113	0.0009753	0.000953309	0.000932102	0.000911641	0.000891892	0.000872823	0.000854401	0.000836599	0.000819388	0.000802743	0.000786638	0.000771051	0.00075596	0.000741342	0.00072718	0.000713453	0.000700143	0.000687235	0.000674711	0.000662557	0.000650758
	0.652131	0.00210999	0.00203754	0.00196881	0.00190356	0.00184156	0.00178259	0.00172648	0.00167304	0.00162211	0.00157354	0.00152718	0.00148291	0.0014406	0.00140014	0.00136143	0.00132436	0.00128886	0.00125482	0.00122217	0.00119085	0.00116077	0.00113187	0.0011041	0.00107739	0.00105169	0.00102696	0.00100314	0.000980185	0.000958062	0.000936727	0.000916143	0.000896276	0.000877093	0.000858562	0.000840655	0.000823342	0.000806599	0.0007904	0.000774722	0.000759543	0.000744841	0.000730596	0.00071679	0.000703405	0.000690422	0.000677827	0.000665604	0.000653738
	0.674185	0.00212221	0.00204927	0.00198008	0.00191439	0.00185198	0.00179263	0.00173615	0.00168236	0.00163109	0.0015822	0.00153555	0.00149099	0.00144841	0.00140769	0.00136873	0.00133143	0.00129569	0.00126144	0.00122859	0.00119707	0.0011668	0.00113773	0.00110978	0.00108291	0.00105705	0.00103217	0.0010082	0.000985108	0.00096285	0.000941387	0.000920679	0.000900693	0.000881395	0.000862754	0.00084474	0.000827325	0.000810483	0.000794189	0.000778419	0.000763151	0.000748364	0.000734037	0.000720151	0.000706688	0.000693632	0.000680965	0.000668672	0.000656739
	0.69626	0.00213453	0.00206111	0.00199145	0.00192532	0.00186249	0.00180275	0.00174589	0.00169175	0.00164015	0.00159094	0.00154398	0.00149913	0.00145628	0.0014153	0.00137609	0.00133855	0.00130259	0.00126812	0.00123506	0.00120334	0.00117288	0.00114363	0.00111551	0.00108847	0.00106245	0.00103741	0.0010133	0.000990069	0.000967675	0.000946081	0.000925249	0.000905142	0.000885729	0.000866976	0.000848855	0.000831337	0.000814395	0.000798005	0.000782143	0.000766785	0.000751912	0.000737501	0.000723535	0.000709995	0.000696863	0.000684124	0.000671761	0.000659759
	0.718356	0.00214697	0.00207305	0.00200293	0.00193635	0.0018731	0.00181296	0.00175573	0.00170123	0.00164929	0.00159976	0.00155249	0.00150735	0.00146422	0.00142297	0.00138351	0.00134573	0.00130954	0.00127485	0.00124159	0.00120966	0.00117902	0.00114958	0.00112128	0.00109407	0.0010679	0.0010427	0.00101844	0.000995067	0.000972537	0.000950812	0.000929853	0.000909625	0.000890095	0.000871229	0.000853	0.000835378	0.000818336	0.000801849	0.000785893	0.000770445	0.000755485	0.00074099	0.000726943	0.000713324	0.000700117	0.000687304	0.000674871	0.000662801
	0.740473	0.00215953	0.0020851	0.0020145	0.00194748	0.00188381	0.00182326	0.00176565	0.00171079	0.00165851	0.00160865	0.00156107	0.00151564	0.00147222	0.00143071	0.00139099	0.00135297	0.00131655	0.00128164	0.00124816	0.00121604	0.0011852	0.00115557	0.0011271	0.00109972	0.00107338	0.00104803	0.00102362	0.0010001	0.000977436	0.000955578	0.000934492	0.000914141	0.000894493	0.000875514	0.000857176	0.000839448	0.000822305	0.00080572	0.00078967	0.000774131	0.000759083	0.000744504	0.000730375	0.000716677	0.000703393	0.000690507	0.000678002	0.000665863
	0.76261	0.0021722	0.00209727	0.00202619	0.00195871	0.00189461	0.00183366	0.00177566	0.00172043	0.0016678	0.00161762	0.00156972	0.00152399	0.0014803	0.00143851	0.00139854	0.00136027	0.00132362	0.00128848	0.00125479	0.00122246	0.00119143	0.00116162	0.00113296	0.00110542	0.00107891	0.00105341	0.00102884	0.00100518	0.000982372	0.00096038	0.000939166	0.000918691	0.000898924	0.000879831	0.000861382	0.000843548	0.000826302	0.000809619	0.000793474	0.000777844	0.000762707	0.000748042	0.000733831	0.000720053	0.000706693	0.000693732	0.000681154	0.000668946
	0.784768	0.00218499	0.00210954	0.00203798	0.00197005	0.00190551	0.00184414	0.00178576	0.00173016	0.00167718	0.00162666	0.00157845	0.00153242	0.00148844	0.00144638	0.00140615	0.00136763	0.00133074	0.00129538	0.00126148	0.00122894	0.00119771	0.00116771	0.00113888	0.00111115	0.00108449	0.00105882	0.0010341	0.00101029	0.000987346	0.000965219	0.000943875	0.000923276	0.000903388	0.00088418	0.000865619	0.000847678	0.00083033	0.000813547	0.000797306	0.000781583	0.000766357	0.000751606	0.000737311	0.000723453	0.000710015	0.000696979	0.000684329	0.00067205
	0.806948	0.0021979	0.00212193	0.00204988	0.00198148	0.0019165	0.00185473	0.00179594	0.00173997	0.00168664	0.00163579	0.00158726	0.00154092	0.00149665	0.00145432	0.00141382	0.00137506	0.00133793	0.00130234	0.00126821	0.00123547	0.00120404	0.00117385	0.00114483	0.00111694	0.0010901	0.00106427	0.00103941	0.00101545	0.000992358	0.000970095	0.00094862	0.000927895	0.000907886	0.000888561	0.000869888	0.000851839	0.000834386	0.000817503	0.000801165	0.000785349	0.000770032	0.000755195	0.000740816	0.000726877	0.00071336	0.000700248	0.000687525	0.000675175
	0.829148	0.00221093	0.00213443	0.00206188	0.00199302	0.0019276	0.0018654	0.00180622	0.00174988	0.00169619	0.00164499	0.00159614	0.0015495	0.00150493	0.00146232	0.00142156	0.00138254	0.00134517	0.00130935	0.00127501	0.00124206	0.00121042	0.00118004	0.00115084	0.00112277	0.00109576	0.00106977	0.00104475	0.00102064	0.000997409	0.000975008	0.0009534	0.000932548	0.000912417	0.000892974	0.000874189	0.00085603	0.000838472	0.000821488	0.000805052	0.000789142	0.000773734	0.000758809	0.000744345	0.000730325	0.000716729	0.000703541	0.000690744	0.000678322
	0.851369	0.00222408	0.00214705	0.002074	0.00200466	0.0019388	0.00187617	0.00181659	0.00175987	0.00170581	0.00165428	0.0016051	0.00155815	0.00151328	0.0014704	0.00142937	0.00139009	0.00135248	0.00131643	0.00128186	0.00124869	0.00121686	0.00118628	0.00115689	0.00112864	0.00110147	0.00107532	0.00105013	0.00102588	0.0010025	0.000979959	0.000958218	0.000937237	0.000916983	0.000897421	0.000878521	0.000860253	0.000842588	0.000825502	0.000808968	0.000792962	0.000777463	0.000762449	0.0007479	0.000733797	0.000720121	0.000706856	0.000693984	0.000681491
	0.873611	0.00223735	0.00215979	0.00208623	0.00201642	0.00195009	0.00188704	0.00182706	0.00176995	0.00171553	0.00166364	0.00161414	0.00156687	0.00152171	0.00147854	0.00143724	0.0013977	0.00135984	0.00132356	0.00128877	0.00125539	0.00122334	0.00119257	0.001163	0.00113457	0.00110722	0.0010809	0.00105556	0.00103115	0.00100763	0.000984948	0.000963072	0.000941962	0.000921583	0.000901901	0.000882886	0.000864506	0.000846735	0.000829545	0.000812911	0.00079681	0.000781219	0.000766115	0.00075148	0.000737294	0.000723537	0.000710194	0.000697248	0.000684682
	0.895874	0.00225075	0.00217265	0.00209858	0.00202828	0.0019615	0.00189801	0.00183762	0.00178011	0.00172533	0.00167309	0.00162325	0.00157567	0.00153021	0.00148675	0.00144517	0.00140538	0.00136727	0.00133075	0.00129573	0.00126213	0.00122988	0.00119891	0.00116915	0.00114054	0.00111302	0.00108653	0.00106103	0.00103647	0.0010128	0.000989975	0.000967963	0.000946722	0.000926217	0.000906415	0.000887283	0.000868791	0.000850912	0.000833618	0.000816884	0.000800686	0.000785001	0.000769808	0.000755085	0.000740815	0.000726978	0.000713556	0.000700534	0.000687894
	0.918159	0.00226427	0.00218562	0.00211104	0.00204024	0.001973	0.00190908	0.00184827	0.00179037	0.00173521	0.00168262	0.00163245	0.00158454	0.00153878	0.00149503	0.00145318	0.00141312	0.00137476	0.001338	0.00130275	0.00126893	0.00123648	0.0012053	0.00117535	0.00114656	0.00111886	0.0010922	0.00106654	0.00104183	0.00101801	0.000995041	0.000972892	0.000951519	0.000930887	0.000910963	0.000891713	0.000873108	0.00085512	0.000837721	0.000820886	0.00080459	0.000788811	0.000773527	0.000758717	0.000744361	0.000730442	0.000716942	0.000703843	0.000691129
	0.940464	0.00227792	0.00219872	0.00212361	0.00205232	0.00198461	0.00192025	0.00185902	0.00180073	0.00174519	0.00169224	0.00164172	0.00159349	0.00154742	0.00150338	0.00146125	0.00142093	0.00138231	0.00134531	0.00130983	0.00127579	0.00124312	0.00121175	0.0011816	0.00115262	0.00112475	0.00109792	0.0010721	0.00104722	0.00102325	0.00100015	0.000977858	0.000956352	0.000935593	0.000915545	0.000896176	0.000877458	0.000859359	0.000841854	0.000824917	0.000808523	0.000792648	0.000777272	0.000762374	0.000747933	0.000733931	0.000720351	0.000707175	0.000694387
	0.96279	0.00229171	0.00221194	0.0021363	0.00206452	0.00199633	0.00193152	0.00186987	0.00181117	0.00175525	0.00170194	0.00165108	0.00160253	0.00155614	0.0015118	0.00146939	0.0014288	0.00138993	0.00135268	0.00131697	0.00128271	0.00124983	0.00121825	0.00118791	0.00115874	0.00113068	0.00110369	0.0010777	0.00105267	0.00102855	0.00100529	0.000982863	0.000961223	0.000940334	0.000920161	0.000900673	0.000881839	0.00086363	0.000846018	0.000828977	0.000812484	0.000796514	0.000781045	0.000766057	0.00075153	0.000737445	0.000723784	0.00071053	0.000697667
	0.985138	0.00230562	0.00222529	0.00214911	0.00207682	0.00200816	0.00194289	0.00188081	0.00182171	0.00176541	0.00171173	0.00166052	0.00161164	0.00156494	0.0015203	0.0014776	0.00143674	0.00139761	0.00136011	0.00132417	0.00128968	0.00125658	0.0012248	0.00119426	0.0011649	0.00113667	0.0011095	0.00108334	0.00105815	0.00103388	0.00101048	0.000987907	0.00096613	0.000945111	0.000924813	0.000905204	0.000886254	0.000867932	0.000850212	0.000833068	0.000816474	0.000800407	0.000784845	0.000769767	0.000755153	0.000740984	0.000727242	0.000713909	0.00070097
	1.00751	0.00231966	0.00223876	0.00216204	0.00208924	0.00202009	0.00195437	0.00189186	0.00183234	0.00177565	0.0017216	0.00167004	0.00162083	0.00157381	0.00152887	0.00148589	0.00144475	0.00140536	0.00136761	0.00133142	0.00129671	0.0012634	0.0012314	0.00120067	0.00117112	0.0011427	0.00111536	0.00108903	0.00106368	0.00103925	0.0010157	0.000992989	0.000971076	0.000949925	0.0009295	0.000909769	0.000890701	0.000872267	0.000854438	0.000837188	0.000820493	0.000804329	0.000788673	0.000773504	0.000758802	0.000744548	0.000730724	0.000717312	0.000704296
	1.0299	0.00233384	0.00225236	0.00217509	0.00210177	0.00203214	0.00196596	0.001903	0.00184307	0.00178599	0.00173157	0.00167965	0.0016301	0.00158276	0.00153751	0.00149424	0.00145283	0.00141317	0.00137517	0.00133874	0.0013038	0.00127027	0.00123806	0.00120712	0.00117738	0.00114878	0.00112126	0.00109477	0.00106925	0.00104467	0.00102097	0.000998111	0.00097606	0.000954775	0.000934223	0.000914369	0.000895183	0.000876634	0.000858695	0.00084134	0.000824542	0.000808279	0.000792528	0.000777267	0.000762477	0.000748137	0.00073423	0.000720739	0.000707646
	1.05231	0.00234816	0.00226608	0.00218827	0.00211443	0.0020443	0.00197765	0.00191425	0.0018539	0.00179642	0.00174162	0.00168935	0.00163945	0.00159179	0.00154623	0.00150267	0.00146097	0.00142105	0.0013828	0.00134612	0.00131095	0.00127719	0.00124478	0.00121363	0.0011837	0.00115491	0.00112721	0.00110055	0.00107487	0.00105012	0.00102627	0.00100327	0.000981082	0.000959663	0.000938981	0.000919003	0.000899697	0.000881034	0.000862984	0.000845521	0.000828621	0.000812258	0.000796411	0.000781058	0.000766178	0.000751752	0.000737762	0.00072419	0.000711019
	1.07474	0.00236261	0.00227994	0.00220157	0.0021272	0.00205657	0.00198944	0.0019256	0.00186483	0.00180694	0.00175176	0.00169913	0.00164888	0.0016009	0.00155503	0.00151116	0.00146919	0.00142899	0.00139048	0.00135357	0.00131816	0.00128418	0.00125155	0.0012202	0.00119007	0.00116109	0.00113321	0.00110637	0.00108053	0.00105563	0.00103162	0.00100847	0.000986143	0.000964589	0.000943777	0.000923673	0.000904246	0.000885466	0.000867305	0.000849734	0.00083273	0.000816267	0.000800323	0.000784876	0.000769906	0.000755393	0.000741319	0.000727665	0.000714416
	1.09719	0.0023772	0.00229393	0.00221499	0.00214009	0.00206896	0.00200135	0.00193705	0.00187585	0.00181756	0.00176199	0.00170899	0.0016584	0.00161008	0.0015639	0.00151974	0.00147747	0.00143701	0.00139824	0.00136107	0.00132543	0.00129122	0.00125837	0.00122682	0.00119649	0.00116732	0.00113926	0.00111225	0.00108623	0.00106117	0.00103701	0.00101372	0.000991243	0.000969552	0.000948608	0.000928378	0.00090883	0.000889933	0.000871658	0.000853979	0.000836869	0.000820305	0.000804263	0.000788722	0.000773661	0.000759061	0.000744901	0.000731166	0.000717837
	1.11967	0.00239193	0.00230806	0.00222855	0.0021531	0.00208146	0.00201337	0.00194862	0.00188698	0.00182828	0.00177232	0.00171895	0.00166801	0.00161935	0.00157285	0.00152838	0.00148583	0.00144509	0.00140606	0.00136864	0.00133276	0.00129832	0.00126525	0.00123349	0.00120296	0.0011736	0.00114535	0.00111817	0.00109198	0.00106676	0.00104245	0.001019	0.000996383	0.000974554	0.000953478	0.00093312	0.000913448	0.000894432	0.000876044	0.000858254	0.000841039	0.000824373	0.000808233	0.000792597	0.000777444	0.000762754	0.000748509	0.000734691	0.000721282
	1.14216	0.0024068	0.00232232	0.00224223	0.00216623	0.00209407	0.0020255	0.00196028	0.00189821	0.00183909	0.00178274	0.00172899	0.0016777	0.0016287	0.00158188	0.00153711	0.00149426	0.00145324	0.00141394	0.00137628	0.00134015	0.00130548	0.00127219	0.00124022	0.00120948	0.00117993	0.0011515	0.00112413	0.00109778	0.00107239	0.00104792	0.00102433	0.00100156	0.000979595	0.000958384	0.000937897	0.000918102	0.000898966	0.000880462	0.000862562	0.00084524	0.000828471	0.000812231	0.000796499	0.000781253	0.000766474	0.000752143	0.000738241	0.000724752
	1.16468	0.00242182	0.00233672	0.00225604	0.00217949	0.00210681	0.00203774	0.00197206	0.00190954	0.00185	0.00179325	0.00173913	0.00168747	0.00163814	0.00159099	0.00154591	0.00150277	0.00146147	0.0014219	0.00138397	0.0013476	0.0013127	0.00127919	0.001247	0.00121606	0.00118632	0.0011577	0.00113015	0.00110363	0.00107807	0.00105344	0.00102969	0.00100678	0.000984674	0.000963329	0.000942712	0.000922791	0.000903535	0.000884915	0.000866902	0.000849472	0.000832599	0.000816259	0.00080043	0.000785091	0.000770222	0.000755803	0.000741817	0.000728246
	1.18722	0.00243698	0.00235125	0.00226998	0.00219288	0.00211967	0.0020501	0.00198394	0.00192098	0.00186101	0.00180386	0.00174936	0.00169733	0.00164765	0.00160018	0.00155478	0.00151134	0.00146976	0.00142992	0.00139174	0.00135512	0.00131998	0.00128625	0.00125384	0.0012227	0.00119275	0.00116394	0.00113622	0.00110952	0.0010838	0.00105901	0.0010351	0.00101205	0.000989794	0.000968311	0.000947563	0.000927515	0.000908138	0.0008894	0.000871275	0.000853736	0.000836758	0.000820316	0.00080439	0.000788956	0.000773996	0.00075949	0.000745419	0.000731766
	1.20978	0.0024523	0.00236593	0.00228406	0.00220639	0.00213265	0.00206257	0.00199594	0.00193252	0.00187213	0.00181457	0.00175967	0.00170729	0.00165726	0.00160945	0.00156374	0.00152	0.00147812	0.00143801	0.00139957	0.0013627	0.00132732	0.00129336	0.00126074	0.00122938	0.00119924	0.00117024	0.00114233	0.00111545	0.00108956	0.00106461	0.00104056	0.00101735	0.000994953	0.000973333	0.000952452	0.000932276	0.000912776	0.00089392	0.000875681	0.000858032	0.000840947	0.000824404	0.000808379	0.00079285	0.000777798	0.000763203	0.000749046	0.00073531
	1.23236	0.00246776	0.00238075	0.00229827	0.00222003	0.00214575	0.00207516	0.00200804	0.00194417	0.00188334	0.00182537	0.00177009	0.00171733	0.00166695	0.0016188	0.00157277	0.00152873	0.00148656	0.00144618	0.00140747	0.00137035	0.00133473	0.00130053	0.00126769	0.00123613	0.00120578	0.00117659	0.00114849	0.00112144	0.00109538	0.00107027	0.00104605	0.00102269	0.00100015	0.000978393	0.000957378	0.000937074	0.000917449	0.000898474	0.00088012	0.00086236	0.000845168	0.000828522	0.000812397	0.000796772	0.000781627	0.000766943	0.000752699	0.00073888
	1.25497	0.00248337	0.00239571	0.00231262	0.0022338	0.00215897	0.00208787	0.00202026	0.00195593	0.00189466	0.00183627	0.00178059	0.00172746	0.00167672	0.00162824	0.00158188	0.00153753	0.00149507	0.00145441	0.00141543	0.00137806	0.0013422	0.00130777	0.0012747	0.00124293	0.00121238	0.00118299	0.00115471	0.00112748	0.00110124	0.00107596	0.00105159	0.00102808	0.00100539	0.000983493	0.000962343	0.000941909	0.000922159	0.000903063	0.000884592	0.00086672	0.000849421	0.00083267	0.000816445	0.000800723	0.000785485	0.00077071	0.000756379	0.000742475
	1.27759	0.00249913	0.00241082	0.00232711	0.00224771	0.00217233	0.0021007	0.0020326	0.00196779	0.00190608	0.00184728	0.0017912	0.00173768	0.00168658	0.00163776	0.00159107	0.00154641	0.00150366	0.00146271	0.00142347	0.00138583	0.00134973	0.00131507	0.00128177	0.00124978	0.00121903	0.00118944	0.00116097	0.00113356	0.00110715	0.00108171	0.00105717	0.00103351	0.00101068	0.000988633	0.000967346	0.000946781	0.000926904	0.000907686	0.000889099	0.000871114	0.000853705	0.00083685	0.000820523	0.000804704	0.000789371	0.000774504	0.000760086	0.000746097
	1.30024	0.00251505	0.00242607	0.00234174	0.00226175	0.0021858	0.00211365	0.00204505	0.00197977	0.00191761	0.00185838	0.0018019	0.001748	0.00169653	0.00164736	0.00160035	0.00155537	0.00151232	0.00147109	0.00143157	0.00139368	0.00135732	0.00132242	0.00128891	0.0012567	0.00122573	0.00119595	0.00116729	0.00113969	0.00111311	0.0010875	0.0010628	0.00103898	0.001016	0.000993813	0.000972388	0.00095169	0.000931686	0.000912345	0.000893639	0.00087554	0.000858022	0.00084106	0.000824631	0.000808713	0.000793285	0.000778327	0.000763819	0.000749744
	1.3229	0.00253113	0.00244148	0.00235651	0.00227592	0.00219941	0.00212673	0.00205762	0.00199186	0.00192925	0.00186958	0.00181269	0.00175841	0.00170658	0.00165705	0.00160971	0.00156441	0.00152106	0.00147954	0.00143974	0.00140159	0.00136498	0.00132984	0.0012961	0.00126367	0.00123249	0.00120251	0.00117365	0.00114587	0.00111912	0.00109333	0.00106847	0.0010445	0.00102136	0.000999034	0.00097747	0.000956638	0.000936505	0.00091704	0.000898214	0.00088	0.000862371	0.000845302	0.00082877	0.000812752	0.000797228	0.000782177	0.000767579	0.000753418
	1.34559	0.00254736	0.00245703	0.00237143	0.00229023	0.00221315	0.00213992	0.00207031	0.00200406	0.00194099	0.00188089	0.00182359	0.00176891	0.00171671	0.00166683	0.00161915	0.00157353	0.00152987	0.00148806	0.00144799	0.00140957	0.00137271	0.00133733	0.00130335	0.0012707	0.00123931	0.00120912	0.00118007	0.00115211	0.00112517	0.00109921	0.00107419	0.00105006	0.00102677	0.0010043	0.000982591	0.000961624	0.000941361	0.000921771	0.000902825	0.000884494	0.000866753	0.000849576	0.00083294	0.000816822	0.0008012	0.000786055	0.000771367	0.000757119
	1.3683	0.00256376	0.00247274	0.00238649	0.00230468	0.00222702	0.00215325	0.00208311	0.00201638	0.00195285	0.00189231	0.00183459	0.00177951	0.00172693	0.0016767	0.00162867	0.00158273	0.00153877	0.00149666	0.0014563	0.00141761	0.0013805	0.00134487	0.00131066	0.00127779	0.00124619	0.00121579	0.00118655	0.00115839	0.00113127	0.00110514	0.00107996	0.00105566	0.00103222	0.0010096	0.000987753	0.000966649	0.000946254	0.000926538	0.00090747	0.000889022	0.000871168	0.000853882	0.000837141	0.000820921	0.000805202	0.000789962	0.000775183	0.000760846
	1.39104	0.00258032	0.0024886	0.00240169	0.00231927	0.00224102	0.0021667	0.00209604	0.00202882	0.00196481	0.00190383	0.00184569	0.00179021	0.00173725	0.00168665	0.00163828	0.00159202	0.00154774	0.00150533	0.00146469	0.00142573	0.00138836	0.00135248	0.00131804	0.00128494	0.00125312	0.00122252	0.00119307	0.00116473	0.00113743	0.00111112	0.00108577	0.00106131	0.00103772	0.00101494	0.000992955	0.000971713	0.000951186	0.000931342	0.000912151	0.000893585	0.000875616	0.00085822	0.000841373	0.000825051	0.000809233	0.000793898	0.000779027	0.0007646
	1.41379	0.00259704	0.00250462	0.00241705	0.002334	0.00225516	0.00218028	0.00210909	0.00204137	0.00197689	0.00191546	0.00185689	0.00180101	0.00174766	0.0016967	0.00164798	0.00160138	0.00155679	0.00151408	0.00147315	0.00143392	0.00139628	0.00136016	0.00132547	0.00129215	0.00126011	0.0012293	0.00119965	0.00117112	0.00114363	0.00111715	0.00109162	0.00106701	0.00104326	0.00102033	0.000998198	0.000976817	0.000956156	0.000936183	0.000916868	0.000898182	0.000880099	0.000862592	0.000845637	0.000829212	0.000813294	0.000797862	0.000782898	0.000768382
	1.43657	0.00261393	0.0025208	0.00243256	0.00234887	0.00226944	0.00219399	0.00212227	0.00205404	0.00198908	0.00192719	0.00186819	0.0018119	0.00175817	0.00170683	0.00165776	0.00161083	0.00156592	0.0015229	0.00148169	0.00144218	0.00140428	0.0013679	0.00133297	0.00129942	0.00126716	0.00123614	0.00120629	0.00117756	0.00114989	0.00112323	0.00109753	0.00107275	0.00104884	0.00102576	0.00100348	0.000981961	0.000961165	0.000941062	0.000921622	0.000902815	0.000884615	0.000866996	0.000849933	0.000833404	0.000817385	0.000801857	0.000786798	0.000772192
	1.45936	0.00263099	0.00253714	0.00244822	0.00236389	0.00228385	0.00220783	0.00213557	0.00206683	0.00200138	0.00193904	0.0018796	0.0018229	0.00176877	0.00171706	0.00166764	0.00162037	0.00157513	0.00153181	0.0014903	0.00145051	0.00141234	0.00137571	0.00134054	0.00130675	0.00127427	0.00124303	0.00121298	0.00118405	0.00115619	0.00112935	0.00110348	0.00107853	0.00105446	0.00103124	0.00100881	0.000987145	0.000966213	0.000945978	0.000926412	0.000907483	0.000889166	0.000871434	0.000854262	0.000837627	0.000821507	0.00080588	0.000790727	0.000776029
	1.48218	0.00264822	0.00255365	0.00246403	0.00237906	0.00229841	0.00222181	0.002149	0.00207974	0.00201381	0.00195099	0.00189112	0.001834	0.00177947	0.00172738	0.0016776	0.00162999	0.00158442	0.00154079	0.00149899	0.00145891	0.00142048	0.00138359	0.00134817	0.00131414	0.00128144	0.00124999	0.00121973	0.0011906	0.00116255	0.00113553	0.00110948	0.00108437	0.00106014	0.00103675	0.00101418	0.00099237	0.0009713	0.000950933	0.000931239	0.000912188	0.000893752	0.000875905	0.000858623	0.000841882	0.000825659	0.000809934	0.000794685	0.000779895
	1.50502	0.00266563	0.00257031	0.00248001	0.00239437	0.00231311	0.00223592	0.00216256	0.00209277	0.00202634	0.00196306	0.00190274	0.0018452	0.00179027	0.0017378	0.00168765	0.00163969	0.0015938	0.00154985	0.00150775	0.00146739	0.00142868	0.00139153	0.00135587	0.0013216	0.00128867	0.001257	0.00122653	0.0011972	0.00116896	0.00114176	0.00111553	0.00109025	0.00106585	0.00104231	0.00101959	0.000997637	0.000976428	0.000955927	0.000936104	0.000916928	0.000898373	0.000880411	0.000863018	0.000846169	0.000829843	0.000814018	0.000798673	0.000783789
	1.52789	0.00268321	0.00258715	0.00249614	0.00240984	0.00232795	0.00225017	0.00217625	0.00210593	0.002039	0.00197525	0.00191447	0.0018565	0.00180116	0.00174831	0.0016978	0.00164949	0.00160326	0.001559	0.00151659	0.00147594	0.00143696	0.00139955	0.00136363	0.00132912	0.00129596	0.00126407	0.00123339	0.00120386	0.00117543	0.00114803	0.00112163	0.00109618	0.00107162	0.00104792	0.00102504	0.00100295	0.000981596	0.00096096	0.000941006	0.000921705	0.000903029	0.000884951	0.000867445	0.000850489	0.000834058	0.000818132	0.00080269	0.000787712
	1.55077	0.00270097	0.00260415	0.00251243	0.00242546	0.00234293	0.00226456	0.00219007	0.00211922	0.00205178	0.00198754	0.00192631	0.00186791	0.00181216	0.00175892	0.00170803	0.00165937	0.00161281	0.00156822	0.00152551	0.00148457	0.00144531	0.00140763	0.00137146	0.00133671	0.00130331	0.0012712	0.00124031	0.00121057	0.00118194	0.00115436	0.00112778	0.00110215	0.00107743	0.00105357	0.00103054	0.0010083	0.000986804	0.000966032	0.000945947	0.00092652	0.000907721	0.000889526	0.000871907	0.000854841	0.000838305	0.000822277	0.000806736	0.000791664
	1.57368	0.0027189	0.00262132	0.00252888	0.00244123	0.00235807	0.00227909	0.00220403	0.00213263	0.00206468	0.00199996	0.00193827	0.00187943	0.00182326	0.00176962	0.00171836	0.00166934	0.00162244	0.00157753	0.00153451	0.00149328	0.00145373	0.00141578	0.00137935	0.00134436	0.00131073	0.00127839	0.00124728	0.00121734	0.00118852	0.00116075	0.00113398	0.00110818	0.00108329	0.00105927	0.00103608	0.00101369	0.000992054	0.000971144	0.000950926	0.000931371	0.00091245	0.000894136	0.000876402	0.000859226	0.000842584	0.000826453	0.000810813	0.000795645
	1.5966	0.00273702	0.00263867	0.0025455	0.00245717	0.00237335	0.00229376	0.00221812	0.00214618	0.00207771	0.00201249	0.00195033	0.00189105	0.00183447	0.00178043	0.00172879	0.00167941	0.00163216	0.00158692	0.00154359	0.00150206	0.00146223	0.00142401	0.00138732	0.00135208	0.00131821	0.00128564	0.00125432	0.00122417	0.00119514	0.00116718	0.00114023	0.00111425	0.00108919	0.00106501	0.00104167	0.00101912	0.000997346	0.000976296	0.000955945	0.000936261	0.000917215	0.000898781	0.000880932	0.000863645	0.000846895	0.000830661	0.000814921	0.000799656
	1.61955	0.00275533	0.00265619	0.00256228	0.00247326	0.00238878	0.00230857	0.00223235	0.00215985	0.00209086	0.00202514	0.00196251	0.00190278	0.00184577	0.00179133	0.00173931	0.00168956	0.00164196	0.0015964	0.00155275	0.00151092	0.0014708	0.0014323	0.00139535	0.00135986	0.00132575	0.00129296	0.00126141	0.00123105	0.00120182	0.00117367	0.00114654	0.00112038	0.00109515	0.0010708	0.0010473	0.0010246	0.00100268	0.000981489	0.000961003	0.000941188	0.000922017	0.000903462	0.000885497	0.000868097	0.000851239	0.0008349	0.000819059	0.000803697
	1.64253	0.00277382	0.00267389	0.00257924	0.00248951	0.00240437	0.00232353	0.00224671	0.00217366	0.00210413	0.00203792	0.00197481	0.00191463	0.00185719	0.00180234	0.00174993	0.00169981	0.00165186	0.00160596	0.00156199	0.00151985	0.00147944	0.00144067	0.00140346	0.00136771	0.00133336	0.00130033	0.00126857	0.001238	0.00120856	0.00118021	0.00115289	0.00112655	0.00110115	0.00107664	0.00105298	0.00103013	0.00100806	0.000986724	0.0009661	0.000946154	0.000926857	0.00090818	0.000890097	0.000872584	0.000855616	0.000839171	0.000823229	0.000807768
	1.66552	0.0027925	0.00269177	0.00259636	0.00250592	0.00242011	0.00233864	0.00226122	0.0021876	0.00211754	0.00205081	0.00198722	0.00192658	0.00186871	0.00181345	0.00176064	0.00171015	0.00166185	0.00161561	0.00157132	0.00152887	0.00148817	0.00144912	0.00141163	0.00137563	0.00134103	0.00130777	0.00127578	0.001245	0.00121536	0.00118681	0.0011593	0.00113278	0.0011072	0.00108252	0.0010587	0.0010357	0.00101347	0.000991999	0.000971238	0.00095116	0.000931734	0.000912934	0.000894732	0.000877104	0.000860026	0.000843475	0.000827429	0.000811869
	1.68853	0.00281138	0.00270983	0.00261366	0.0025225	0.00243601	0.0023539	0.00227587	0.00220168	0.00213107	0.00206383	0.00199975	0.00193865	0.00188034	0.00182466	0.00177146	0.00172059	0.00167193	0.00162534	0.00158073	0.00153797	0.00149697	0.00145764	0.00141988	0.00138362	0.00134877	0.00131528	0.00128306	0.00125206	0.00122221	0.00119346	0.00116576	0.00113906	0.0011133	0.00108845	0.00106447	0.00104131	0.00101894	0.000997317	0.000976417	0.000956204	0.00093665	0.000917725	0.000899403	0.00088166	0.00086447	0.000847811	0.000831662	0.000816001
	1.71157	0.00283044	0.00272808	0.00263114	0.00253924	0.00245207	0.0023693	0.00229067	0.00221589	0.00214473	0.00207698	0.00201241	0.00195083	0.00189208	0.00183597	0.00178237	0.00173112	0.0016821	0.00163517	0.00159022	0.00154715	0.00150585	0.00146623	0.0014282	0.00139167	0.00135658	0.00132285	0.0012904	0.00125918	0.00122912	0.00120017	0.00117228	0.00114539	0.00111945	0.00109443	0.00107028	0.00104697	0.00102444	0.00100268	0.000981636	0.000961288	0.000941603	0.000922553	0.000904111	0.00088625	0.000868948	0.00085218	0.000835926	0.000820164
	1.73463	0.00284971	0.00274651	0.00264879	0.00255616	0.00246829	0.00238487	0.00230561	0.00223024	0.00215853	0.00209025	0.00202518	0.00196313	0.00190393	0.0018474	0.00179339	0.00174175	0.00169236	0.00164508	0.0015998	0.00155641	0.00151481	0.0014749	0.00143659	0.0013998	0.00136446	0.00133048	0.0012978	0.00126636	0.00123609	0.00120693	0.00117884	0.00115177	0.00112566	0.00110046	0.00107615	0.00105267	0.00102999	0.00100808	0.000986897	0.000966413	0.000946596	0.000927419	0.000908854	0.000890876	0.00087346	0.000856583	0.000840223	0.000824359
	1.75771	0.00286917	0.00276514	0.00266662	0.00257324	0.00248467	0.00240058	0.00232069	0.00224474	0.00217246	0.00210365	0.00203807	0.00197555	0.00191589	0.00185893	0.00180451	0.00175248	0.00170272	0.00165508	0.00160947	0.00156576	0.00152385	0.00148364	0.00144506	0.001408	0.0013724	0.00133818	0.00130527	0.0012736	0.00124311	0.00121376	0.00118547	0.0011582	0.00113191	0.00110654	0.00108206	0.00105842	0.00103559	0.00101353	0.000992201	0.000971578	0.000951628	0.000932323	0.000913635	0.000895538	0.000878007	0.000861019	0.000844553	0.000828585
	1.78082	0.00288884	0.00278395	0.00268463	0.0025905	0.00250121	0.00241646	0.00233593	0.00225937	0.00218653	0.00211718	0.00205109	0.00198808	0.00192796	0.00187056	0.00181573	0.00176331	0.00171317	0.00166518	0.00161922	0.00157519	0.00153297	0.00149247	0.0014536	0.00141627	0.00138041	0.00134595	0.0013128	0.0012809	0.0012502	0.00122063	0.00119215	0.00116469	0.00113821	0.00111267	0.00108802	0.00106422	0.00104123	0.00101902	0.000997546	0.000976784	0.0009567	0.000937266	0.000918453	0.000900236	0.000882589	0.00086549	0.000848915	0.000832844
	1.80394	0.00290871	0.00280296	0.00270283	0.00260793	0.00251793	0.00243249	0.00235132	0.00227416	0.00220074	0.00213084	0.00206424	0.00200074	0.00194015	0.00188231	0.00182706	0.00177424	0.00172372	0.00167537	0.00162907	0.0015847	0.00154217	0.00150137	0.00146222	0.00142462	0.0013885	0.00135378	0.00132039	0.00128827	0.00125735	0.00122757	0.00119888	0.00117123	0.00114457	0.00111885	0.00109403	0.00107006	0.00104692	0.00102455	0.00100293	0.000982031	0.000961812	0.000942247	0.000923309	0.00090497	0.000887207	0.000869994	0.000853311	0.000837135
	1.82709	0.00292879	0.00282217	0.00272122	0.00262555	0.00253481	0.00244868	0.00236686	0.00228908	0.00221508	0.00214463	0.00207751	0.00201351	0.00195246	0.00189417	0.00183849	0.00178527	0.00173437	0.00168565	0.001639	0.0015943	0.00155145	0.00151035	0.00147091	0.00143304	0.00139665	0.00136168	0.00132805	0.0012957	0.00126456	0.00123457	0.00120568	0.00117783	0.00115098	0.00112508	0.00110009	0.00107595	0.00105265	0.00103013	0.00100837	0.000987321	0.000966965	0.000947268	0.000928203	0.000909742	0.00089186	0.000874534	0.00085774	0.000841458
	1.85026	0.00294907	0.00284157	0.00273979	0.00264334	0.00255186	0.00246504	0.00238256	0.00230416	0.00222957	0.00215856	0.00209091	0.00202641	0.00196488	0.00190614	0.00185004	0.00179641	0.00174511	0.00169603	0.00164903	0.00160399	0.00156082	0.00151942	0.00147968	0.00144153	0.00140488	0.00136965	0.00133578	0.00130319	0.00127183	0.00124162	0.00121253	0.00118449	0.00115745	0.00113136	0.00110619	0.0010819	0.00105843	0.00103575	0.00101384	0.000992652	0.000972158	0.000952329	0.000933135	0.00091455	0.000896549	0.000879108	0.000862204	0.000845814
	1.87345	0.00296957	0.00286118	0.00275856	0.00266131	0.00256909	0.00248156	0.00239842	0.00231938	0.0022442	0.00217262	0.00210444	0.00203944	0.00197743	0.00191823	0.00186169	0.00180765	0.00175596	0.0017065	0.00165914	0.00161377	0.00157028	0.00152856	0.00148853	0.0014501	0.00141318	0.00137769	0.00134358	0.00131075	0.00127916	0.00124874	0.00121944	0.00119119	0.00116396	0.0011377	0.00111235	0.00108788	0.00106425	0.00104142	0.00101936	0.000998027	0.000977393	0.000957429	0.000938106	0.000919396	0.000901275	0.000883718	0.000866702	0.000850204
	1.89666	0.00299029	0.00288099	0.00277752	0.00267947	0.00258649	0.00249825	0.00241443	0.00233476	0.00225897	0.00218683	0.0021181	0.00205259	0.00199009	0.00193043	0.00187345	0.00181899	0.00176691	0.00171707	0.00166935	0.00162364	0.00157982	0.00153779	0.00149746	0.00145874	0.00142155	0.00138581	0.00135144	0.00131838	0.00128656	0.00125592	0.0012264	0.00119796	0.00117054	0.00114409	0.00111856	0.00109392	0.00107013	0.00104714	0.00102492	0.00100344	0.00098267	0.00096257	0.000943116	0.000924281	0.000906038	0.000888364	0.000871234	0.000854627
	1.9199	0.00301123	0.00290101	0.00279667	0.00269782	0.00260407	0.00251511	0.00243061	0.00235029	0.00227389	0.00220117	0.0021319	0.00206586	0.00200287	0.00194275	0.00188533	0.00183044	0.00177796	0.00172774	0.00167966	0.00163359	0.00158944	0.0015471	0.00150647	0.00146746	0.00143	0.00139399	0.00135937	0.00132607	0.00129402	0.00126316	0.00123343	0.00120478	0.00117717	0.00115053	0.00112482	0.00110001	0.00107605	0.0010529	0.00103053	0.00100891	0.000987989	0.000967752	0.000948166	0.000929203	0.000910838	0.000893045	0.000875802	0.000859085
	1.94316	0.00303238	0.00292124	0.00281603	0.00271635	0.00262183	0.00253214	0.00244695	0.00236598	0.00228896	0.00221566	0.00214583	0.00207927	0.00201578	0.00195519	0.00189731	0.001842	0.00178911	0.00173851	0.00169006	0.00164364	0.00159916	0.0015565	0.00151556	0.00147626	0.00143852	0.00140225	0.00136737	0.00133382	0.00130154	0.00127046	0.00124052	0.00121167	0.00118385	0.00115702	0.00113114	0.00110615	0.00108202	0.00105871	0.00103619	0.00101441	0.000993351	0.000972975	0.000953256	0.000934165	0.000915676	0.000897763	0.000880404	0.000863576
	1.96644	0.00305376	0.00294168	0.00283559	0.00273508	0.00263978	0.00254934	0.00246345	0.00238182	0.00230418	0.00223029	0.0021599	0.00209281	0.00202882	0.00196774	0.00190941	0.00185367	0.00180037	0.00174938	0.00170055	0.00165379	0.00160896	0.00156598	0.00152473	0.00148514	0.00144712	0.00141057	0.00137544	0.00134165	0.00130913	0.00127782	0.00124767	0.00121861	0.00119059	0.00116357	0.0011375	0.00111234	0.00108804	0.00106457	0.00104189	0.00101996	0.000998755	0.00097824	0.000958386	0.000939165	0.000920551	0.000902518	0.000885043	0.000868103
	1.98974	0.00307537	0.00296234	0.00285535	0.002754	0.0026579	0.00256672	0.00248012	0.00239783	0.00231956	0.00224506	0.0021741	0.00210648	0.00204198	0.00198042	0.00192163	0.00186546	0.00181174	0.00176035	0.00171115	0.00166402	0.00161886	0.00157554	0.00153399	0.0014941	0.00145579	0.00141898	0.00138359	0.00134954	0.00131679	0.00128525	0.00125487	0.0012256	0.00119739	0.00117018	0.00114392	0.00111858	0.00109411	0.00107048	0.00104764	0.00102556	0.0010042	0.000983548	0.000963558	0.000944206	0.000925465	0.000907311	0.000889718	0.000872664
	2.01307	0.00309721	0.00298322	0.00287533	0.00277312	0.00267622	0.00258428	0.00249697	0.00241399	0.00233508	0.00225998	0.00218845	0.00212028	0.00205527	0.00199322	0.00193397	0.00187735	0.00182321	0.00177142	0.00172184	0.00167435	0.00162884	0.0015852	0.00154333	0.00150314	0.00146454	0.00142745	0.0013918	0.00135751	0.00132451	0.00129274	0.00126215	0.00123266	0.00120424	0.00117684	0.0011504	0.00112487	0.00110023	0.00107643	0.00105343	0.0010312	0.0010097	0.000988898	0.00096877	0.000949286	0.000930418	0.000912141	0.000894429	0.000877261
	2.03641	0.00311928	0.00300431	0.00289551	0.00279244	0.00269472	0.00260201	0.00251398	0.00243032	0.00235076	0.00227505	0.00220294	0.00213422	0.00206868	0.00200614	0.00194642	0.00188936	0.0018348	0.0017826	0.00173263	0.00168478	0.00163892	0.00159494	0.00155276	0.00151226	0.00147337	0.00143601	0.00140009	0.00136554	0.0013323	0.0013003	0.00126948	0.00123978	0.00121116	0.00118355	0.00115692	0.00113122	0.0011064	0.00108243	0.00105927	0.00103688	0.00101523	0.000994291	0.000974025	0.000954407	0.00093541	0.000917008	0.000899177	0.000881894
	2.05978	0.00314159	0.00302564	0.0029159	0.00281196	0.00271342	0.00261993	0.00253117	0.00244682	0.0023666	0.00229027	0.00221758	0.0021483	0.00208223	0.00201919	0.00195899	0.00190148	0.00184649	0.00179388	0.00174353	0.0016953	0.00164909	0.00160478	0.00156227	0.00152147	0.00148228	0.00144464	0.00140845	0.00137364	0.00134016	0.00130792	0.00127688	0.00124696	0.00121813	0.00119033	0.00116351	0.00113762	0.00111263	0.00108849	0.00106516	0.00104262	0.00102082	0.000999727	0.000979321	0.000959569	0.000940442	0.000921915	0.000903963	0.000886562
	2.08318	0.00316413	0.00304719	0.00293651	0.00283168	0.00273231	0.00263804	0.00254853	0.00246348	0.0023826	0.00230564	0.00223235	0.00216252	0.00209592	0.00203237	0.00197169	0.00191372	0.00185829	0.00180527	0.00175452	0.00170592	0.00165935	0.0016147	0.00157186	0.00153075	0.00149127	0.00145334	0.00141688	0.00138182	0.00134808	0.00131561	0.00128434	0.00125421	0.00122516	0.00119716	0.00117014	0.00114407	0.0011189	0.00109459	0.0010711	0.0010484	0.00102644	0.00100521	0.000984661	0.000964772	0.000945514	0.00092686	0.000908786	0.000891268
	2.10659	0.00318692	0.00306897	0.00295734	0.00285162	0.0027514	0.00265633	0.00256607	0.00248031	0.00239877	0.00232117	0.00224728	0.00217687	0.00210973	0.00204567	0.00198451	0.00192607	0.00187021	0.00181677	0.00176562	0.00171664	0.00166971	0.00162471	0.00158155	0.00154012	0.00150035	0.00146213	0.00142539	0.00139007	0.00135608	0.00132337	0.00129186	0.00126151	0.00123226	0.00120405	0.00117684	0.00115058	0.00112523	0.00110074	0.00107709	0.00105422	0.00103212	0.00101073	0.000990043	0.000970017	0.000950626	0.000931844	0.000913647	0.00089601
	2.13003	0.00320996	0.00309098	0.00297839	0.00287176	0.00277069	0.00267482	0.0025838	0.00249732	0.00241509	0.00233686	0.00226236	0.00219137	0.00212369	0.00205911	0.00199745	0.00193855	0.00188224	0.00182838	0.00177683	0.00172747	0.00168017	0.00163482	0.00159133	0.00154958	0.0015095	0.00147099	0.00143398	0.00139839	0.00136415	0.00133119	0.00129946	0.00126888	0.00123941	0.001211	0.00118359	0.00115714	0.00113161	0.00110695	0.00108313	0.0010601	0.00103784	0.0010163	0.000995469	0.000975304	0.000955779	0.000936868	0.000918546	0.000900789
	2.15348	0.00323325	0.00311323	0.00299966	0.00289212	0.00279019	0.0026935	0.00260171	0.0025145	0.00243159	0.0023527	0.00227759	0.00220602	0.00213778	0.00207268	0.00201052	0.00195114	0.00189439	0.0018401	0.00178814	0.00173839	0.00169072	0.00164502	0.00160119	0.00155913	0.00151874	0.00147994	0.00144265	0.00140679	0.00137229	0.00133909	0.00130711	0.00127631	0.00124663	0.00121801	0.0011904	0.00116376	0.00113804	0.00111321	0.00108921	0.00106602	0.0010436	0.00102192	0.00100094	0.000980633	0.000960973	0.000941932	0.000923485	0.000905606
	2.17697	0.00325679	0.00313572	0.00302117	0.00291269	0.00280988	0.00271237	0.0026198	0.00253186	0.00244825	0.0023687	0.00229297	0.00222081	0.00215201	0.00208638	0.00202372	0.00196386	0.00190665	0.00185193	0.00179956	0.00174942	0.00170137	0.00165532	0.00161115	0.00156876	0.00152806	0.00148896	0.00145139	0.00141526	0.0013805	0.00134705	0.00131484	0.00128381	0.00125391	0.00122508	0.00119727	0.00117043	0.00114453	0.00111952	0.00109535	0.001072	0.00104942	0.00102758	0.00100645	0.000986006	0.000966209	0.000947037	0.000928462	0.000910461
	2.20047	0.00328058	0.00315845	0.0030429	0.00293348	0.00282979	0.00273144	0.00263808	0.00254939	0.00246508	0.00238487	0.0023085	0.00223575	0.00216638	0.00210021	0.00203704	0.0019767	0.00191903	0.00186387	0.00181109	0.00176055	0.00171213	0.00166571	0.0016212	0.00157848	0.00153747	0.00149807	0.00146021	0.0014238	0.00138879	0.00135508	0.00132263	0.00129137	0.00126125	0.00123221	0.00120419	0.00117717	0.00115107	0.00112588	0.00110154	0.00107802	0.00105528	0.00103329	0.00101201	0.000991422	0.000971487	0.000952182	0.000933479	0.000915355
	2.224	0.00330464	0.00318143	0.00306487	0.0029545	0.0028499	0.00275071	0.00265655	0.00256711	0.00248209	0.0024012	0.0023242	0.00225084	0.0021809	0.00211419	0.0020505	0.00198967	0.00193153	0.00187593	0.00182273	0.00177178	0.00172298	0.0016762	0.00163134	0.00158829	0.00154696	0.00150726	0.00146911	0.00143243	0.00139714	0.00136319	0.00133049	0.001299	0.00126865	0.0012394	0.00121118	0.00118395	0.00115767	0.0011323	0.00110778	0.00108409	0.00106119	0.00103904	0.00101762	0.000996882	0.000976808	0.000957368	0.000938536	0.000920287
	2.24754	0.00332896	0.00320466	0.00308707	0.00297573	0.00287023	0.00277018	0.00267521	0.00258501	0.00249927	0.0024177	0.00234005	0.00226608	0.00219556	0.0021283	0.00206409	0.00200277	0.00194416	0.00188811	0.00183448	0.00178313	0.00173394	0.00168679	0.00164157	0.00159819	0.00155654	0.00151653	0.00147809	0.00144113	0.00140558	0.00137136	0.00133842	0.0013067	0.00127612	0.00124665	0.00121823	0.0011908	0.00116433	0.00113877	0.00111408	0.00109022	0.00106715	0.00104485	0.00102327	0.00100239	0.000982172	0.000962597	0.000943634	0.000925258
	2.27112	0.00335354	0.00322814	0.00310951	0.0029972	0.00289078	0.00278986	0.00269408	0.0026031	0.00251662	0.00243436	0.00235606	0.00228147	0.00221037	0.00214255	0.00207782	0.00201599	0.0019569	0.0019004	0.00184634	0.00179458	0.001745	0.00169748	0.00165191	0.00160818	0.00156621	0.00152589	0.00148715	0.00144991	0.00141409	0.00137961	0.00134643	0.00131446	0.00128366	0.00125397	0.00122533	0.0011977	0.00117104	0.00114529	0.00112042	0.00109639	0.00107316	0.0010507	0.00102897	0.00100794	0.00098758	0.000967867	0.000948772	0.000930269
	2.29471	0.0033784	0.00325188	0.0031322	0.0030189	0.00291155	0.00280975	0.00271313	0.00262138	0.00253416	0.0024512	0.00237224	0.00229702	0.00222533	0.00215694	0.00209168	0.00202934	0.00196977	0.00191281	0.00185831	0.00180614	0.00175616	0.00170826	0.00166233	0.00161827	0.00157596	0.00153534	0.0014963	0.00145877	0.00142267	0.00138794	0.0013545	0.00132229	0.00129126	0.00126135	0.0012325	0.00120467	0.00117781	0.00115187	0.00112682	0.00110262	0.00107922	0.00105659	0.00103471	0.00101353	0.000993031	0.00097318	0.000953952	0.000935321
	2.31833	0.00340353	0.00327587	0.00315513	0.00304083	0.00293253	0.00282984	0.00273239	0.00263984	0.00255188	0.00246822	0.00238858	0.00231273	0.00224044	0.00217148	0.00210567	0.00204283	0.00198277	0.00192535	0.00187041	0.00181781	0.00176743	0.00171916	0.00167286	0.00162845	0.00158581	0.00154487	0.00150553	0.00146771	0.00143133	0.00139634	0.00136264	0.00133019	0.00129893	0.00126879	0.00123973	0.00121169	0.00118463	0.00115851	0.00113328	0.0011089	0.00108533	0.00106254	0.0010405	0.00101917	0.000998527	0.000978537	0.000959174	0.000940412
	2.34196	0.00342894	0.00330014	0.00317831	0.003063	0.00295375	0.00285016	0.00275186	0.0026585	0.00256978	0.0024854	0.00240509	0.0023286	0.0022557	0.00218617	0.00211981	0.00205645	0.0019959	0.001938	0.00188261	0.0018296	0.00177881	0.00173015	0.00168349	0.00163872	0.00159575	0.00155449	0.00151484	0.00147673	0.00144008	0.00140481	0.00137086	0.00133816	0.00130666	0.0012763	0.00124702	0.00121878	0.00119152	0.0011652	0.00113979	0.00111523	0.00109149	0.00106854	0.00104634	0.00102486	0.00100407	0.000983936	0.000964437	0.000945545
	2.36562	0.00345463	0.00332466	0.00320175	0.00308541	0.00297519	0.00287068	0.00277152	0.00267736	0.00258787	0.00250277	0.00242177	0.00234463	0.00227111	0.002201	0.00213409	0.0020702	0.00200915	0.00195078	0.00189494	0.00184149	0.0017903	0.00174125	0.00169421	0.00164909	0.00160578	0.0015642	0.00152424	0.00148583	0.0014489	0.00141336	0.00137915	0.00134621	0.00131447	0.00128388	0.00125438	0.00122592	0.00119846	0.00117195	0.00114635	0.00112161	0.0010977	0.00107459	0.00105223	0.00103059	0.00100965	0.00098938	0.000969744	0.000950719
	2.38931	0.00348061	0.00334946	0.00322544	0.00310806	0.00299686	0.00289143	0.0027914	0.00269642	0.00260615	0.00252031	0.00243862	0.00236083	0.00228668	0.00221598	0.00214851	0.00208409	0.00202253	0.00196368	0.00190739	0.00185351	0.0018019	0.00175245	0.00170504	0.00165956	0.00161591	0.001574	0.00153373	0.00149502	0.0014578	0.00142199	0.00138751	0.00135432	0.00132234	0.00129152	0.0012618	0.00123313	0.00120547	0.00117876	0.00115297	0.00112805	0.00110397	0.00108068	0.00105816	0.00103638	0.00101529	0.000994868	0.000975093	0.000955934
	2.41301	0.00350688	0.00337454	0.0032494	0.00313096	0.00301876	0.0029124	0.00281149	0.00271568	0.00262463	0.00253804	0.00245565	0.00237719	0.00230241	0.00223111	0.00216308	0.00209812	0.00203605	0.00197672	0.00191996	0.00186563	0.00181361	0.00176376	0.00171597	0.00167013	0.00162613	0.00158388	0.0015433	0.00150429	0.00146678	0.00143069	0.00139595	0.00136251	0.00133028	0.00129923	0.00126929	0.0012404	0.00121253	0.00118563	0.00115965	0.00113455	0.00111029	0.00108683	0.00106415	0.0010422	0.00102096	0.0010004	0.000980486	0.000961192
	2.43674	0.00353344	0.00339989	0.00327361	0.00315411	0.00304091	0.0029336	0.0028318	0.00273514	0.00264329	0.00255596	0.00247285	0.00239372	0.00231831	0.0022464	0.00217779	0.00211228	0.0020497	0.00198987	0.00193265	0.00187788	0.00182543	0.00177518	0.001727	0.00168079	0.00163645	0.00159387	0.00155296	0.00151365	0.00147584	0.00143947	0.00140447	0.00137077	0.0013383	0.00130701	0.00127684	0.00124774	0.00121966	0.00119256	0.00116638	0.0011411	0.00111666	0.00109303	0.00107019	0.00104808	0.00102669	0.00100598	0.000985923	0.000966493
	2.4605	0.0035603	0.00342553	0.0032981	0.00317751	0.00306329	0.00295503	0.00285232	0.00275481	0.00266215	0.00257406	0.00249023	0.00241041	0.00233436	0.00226184	0.00219265	0.00212659	0.00206349	0.00200316	0.00194547	0.00189025	0.00183737	0.00178671	0.00173814	0.00169156	0.00164686	0.00160394	0.00156271	0.00152309	0.00148499	0.00144834	0.00141306	0.0013791	0.00134638	0.00131485	0.00128446	0.00125514	0.00122685	0.00119954	0.00117317	0.0011477	0.00112308	0.00109929	0.00107627	0.00105401	0.00103246	0.0010116	0.000991405	0.000971836
	2.48427	0.00358746	0.00345145	0.00332286	0.00320117	0.00308592	0.00297669	0.00287306	0.00277468	0.00268122	0.00259235	0.0025078	0.00242729	0.00235058	0.00227744	0.00220766	0.00214105	0.00207741	0.00201659	0.00195841	0.00190273	0.00184942	0.00179835	0.00174939	0.00170243	0.00165737	0.00161411	0.00157256	0.00153262	0.00149422	0.00145728	0.00142173	0.00138751	0.00135454	0.00132277	0.00129214	0.0012626	0.0012341	0.00120659	0.00118002	0.00115436	0.00112957	0.00110559	0.00108241	0.00105999	0.00103828	0.00101728	0.000996931	0.000977224
	2.50807	0.00361493	0.00347766	0.00334789	0.00322509	0.0031088	0.00299858	0.00289403	0.00279477	0.00270048	0.00261083	0.00252554	0.00244433	0.00236696	0.0022932	0.00222283	0.00215565	0.00209148	0.00203014	0.00197148	0.00191534	0.00186159	0.0018101	0.00176074	0.00171341	0.00166798	0.00162438	0.00158249	0.00154224	0.00150354	0.00146631	0.00143048	0.00139599	0.00136277	0.00133076	0.00129989	0.00127013	0.00124141	0.0012137	0.00118693	0.00116108	0.0011361	0.00111195	0.0010886	0.00106601	0.00104415	0.00102299	0.0010025	0.000982655
	2.53189	0.00364271	0.00350417	0.0033732	0.00324928	0.00313193	0.00302071	0.00291522	0.00281508	0.00271995	0.00262951	0.00254347	0.00246156	0.00238352	0.00230912	0.00223815	0.00217039	0.00210568	0.00204383	0.00198468	0.00192808	0.00187388	0.00182197	0.00177221	0.00172448	0.0016787	0.00163474	0.00159252	0.00155194	0.00151294	0.00147542	0.00143931	0.00140455	0.00137107	0.00133881	0.00130772	0.00127773	0.00124879	0.00122087	0.0011939	0.00116786	0.00114269	0.00111837	0.00109484	0.00107209	0.00105007	0.00102876	0.00100812	0.000988131
	2.55573	0.0036708	0.00353097	0.00339879	0.00327373	0.00315531	0.00304308	0.00293664	0.00283561	0.00273963	0.00264839	0.00256159	0.00247896	0.00240025	0.0023252	0.00225362	0.00218529	0.00212003	0.00205765	0.00199801	0.00194093	0.00188629	0.00183395	0.00178378	0.00173567	0.00168951	0.0016452	0.00160264	0.00156174	0.00152243	0.00148461	0.00144822	0.00141319	0.00137945	0.00134695	0.00131561	0.00128539	0.00125624	0.0012281	0.00120093	0.00117469	0.00114934	0.00112483	0.00110114	0.00107822	0.00105604	0.00103457	0.00101378	0.000993651
	2.57959	0.00369922	0.00355808	0.00342467	0.00329846	0.00317895	0.0030657	0.0029583	0.00285635	0.00275952	0.00266747	0.00257991	0.00249655	0.00241715	0.00234145	0.00226925	0.00220034	0.00213452	0.00207162	0.00201147	0.00195392	0.00189882	0.00184605	0.00179546	0.00174696	0.00170043	0.00165575	0.00161285	0.00157163	0.001532	0.00149389	0.00145721	0.00142191	0.00138791	0.00135515	0.00132357	0.00129312	0.00126374	0.00123539	0.00120802	0.00118159	0.00115605	0.00113136	0.00110749	0.0010844	0.00106206	0.00104043	0.0010195	0.000999218
	2.60348	0.00372795	0.00358549	0.00345084	0.00332346	0.00320285	0.00308857	0.00298019	0.00287732	0.00277962	0.00268675	0.00259841	0.00251432	0.00243422	0.00235787	0.00228505	0.00221554	0.00214916	0.00208572	0.00202507	0.00196703	0.00191148	0.00185826	0.00180726	0.00175836	0.00171145	0.00166641	0.00162317	0.00158161	0.00154167	0.00150325	0.00146629	0.00143071	0.00139644	0.00136343	0.0013316	0.00130092	0.00127132	0.00124275	0.00121518	0.00118854	0.00116281	0.00113794	0.00111389	0.00109063	0.00106813	0.00104634	0.00102525	0.00100483
	2.62739	0.00375702	0.00361322	0.00347731	0.00334874	0.00322702	0.00311169	0.00300232	0.00289852	0.00279994	0.00270624	0.00261711	0.00253228	0.00245148	0.00237446	0.002301	0.0022309	0.00216395	0.00209997	0.0020388	0.00198028	0.00192425	0.0018706	0.00181918	0.00176987	0.00172257	0.00167717	0.00163358	0.00159169	0.00155142	0.0015127	0.00147545	0.00143958	0.00140505	0.00137178	0.00133971	0.00130879	0.00127896	0.00125018	0.00122239	0.00119556	0.00116963	0.00114457	0.00112035	0.00109691	0.00107424	0.0010523	0.00103106	0.00101049
	2.65133	0.00378642	0.00364126	0.00350407	0.0033743	0.00325145	0.00313506	0.00302469	0.00291995	0.00282047	0.00272593	0.00263601	0.00255043	0.00246891	0.00239122	0.00231712	0.00224641	0.00217888	0.00211436	0.00205267	0.00199365	0.00193716	0.00188305	0.0018312	0.00178149	0.00173381	0.00168804	0.00164408	0.00160186	0.00156127	0.00152224	0.00148469	0.00144854	0.00141374	0.00138021	0.00134789	0.00131673	0.00128667	0.00125767	0.00122967	0.00120263	0.00117651	0.00115126	0.00112686	0.00110325	0.00108042	0.00105831	0.00103692	0.00101619
	2.67528	0.00381616	0.00366962	0.00353114	0.00340015	0.00327616	0.00315869	0.0030473	0.00294161	0.00284123	0.00274584	0.00265511	0.00256876	0.00248653	0.00240815	0.00233341	0.00226208	0.00219397	0.00212889	0.00206668	0.00200716	0.00195019	0.00189563	0.00184335	0.00179323	0.00174515	0.001699	0.00165469	0.00161213	0.00157121	0.00153187	0.00149402	0.00145758	0.0014225	0.00138871	0.00135614	0.00132474	0.00129445	0.00126522	0.00123701	0.00120977	0.00118345	0.00115801	0.00113343	0.00110964	0.00108664	0.00106437	0.00104282	0.00102195
	2.69926	0.00384625	0.00369831	0.00355851	0.0034263	0.00330115	0.00318258	0.00307017	0.0029635	0.00286221	0.00276596	0.00267442	0.0025873	0.00250433	0.00242526	0.00234986	0.00227792	0.00220922	0.00214358	0.00208083	0.0020208	0.00196335	0.00190833	0.00185562	0.00180508	0.0017566	0.00171007	0.0016654	0.00162249	0.00158124	0.00154158	0.00150343	0.00146671	0.00143135	0.00139729	0.00136447	0.00133282	0.0013023	0.00127285	0.00124442	0.00121697	0.00119045	0.00116482	0.00114005	0.00111609	0.00109292	0.00107049	0.00104877	0.00102775
	2.72326	0.00387668	0.00372732	0.0035862	0.00345274	0.00332641	0.00320674	0.00309329	0.00298564	0.00288343	0.00278629	0.00269393	0.00260603	0.00252232	0.00244255	0.00236649	0.00229391	0.00222462	0.00215841	0.00209512	0.00203458	0.00197665	0.00192116	0.001868	0.00181704	0.00176816	0.00172125	0.00167622	0.00163295	0.00159137	0.00155139	0.00151293	0.00147592	0.00144028	0.00140595	0.00137287	0.00134098	0.00131022	0.00128054	0.00125189	0.00122423	0.00119751	0.00117169	0.00114673	0.00112259	0.00109925	0.00107665	0.00105478	0.0010336
	2.74729	0.00390746	0.00375667	0.0036142	0.00347947	0.00335196	0.00323117	0.00311666	0.00300802	0.00290487	0.00280685	0.00271365	0.00262496	0.0025405	0.00246003	0.00238329	0.00231008	0.00224017	0.00217339	0.00210956	0.0020485	0.00199007	0.00193412	0.00188051	0.00182912	0.00177984	0.00173254	0.00168713	0.00164351	0.0016016	0.00156129	0.00152252	0.00148521	0.00144929	0.00141469	0.00138135	0.00134921	0.00131821	0.0012883	0.00125943	0.00123156	0.00120463	0.00117862	0.00115347	0.00112915	0.00110563	0.00108287	0.00106083	0.0010395
	2.77134	0.00393861	0.00378636	0.00364253	0.00350652	0.0033778	0.00325587	0.0031403	0.00303065	0.00292655	0.00282763	0.00273358	0.00264409	0.00255888	0.00247768	0.00240027	0.00232641	0.00225589	0.00218853	0.00212414	0.00206256	0.00200363	0.0019472	0.00189314	0.00184132	0.00179162	0.00174393	0.00169815	0.00165418	0.00161192	0.00157128	0.0015322	0.00149459	0.00145838	0.00142351	0.0013899	0.00135751	0.00132627	0.00129613	0.00126704	0.00123895	0.00121182	0.00118561	0.00116027	0.00113577	0.00111207	0.00108914	0.00106694	0.00104544
	2.79541	0.00397011	0.00381639	0.00367118	0.00353387	0.00340393	0.00328085	0.0031642	0.00305353	0.00294846	0.00284864	0.00275373	0.00266343	0.00257745	0.00249553	0.00241742	0.00234291	0.00227177	0.00220382	0.00213888	0.00207676	0.00201733	0.00196042	0.0019059	0.00185364	0.00180353	0.00175544	0.00170928	0.00166494	0.00162233	0.00158137	0.00154197	0.00150406	0.00146756	0.00143241	0.00139854	0.00136589	0.0013344	0.00130403	0.00127471	0.00124641	0.00121907	0.00119265	0.00116712	0.00114244	0.00111856	0.00109546	0.0010731	0.00105144
	2.8195	0.00400199	0.00384678	0.00370016	0.00356153	0.00343035	0.00330612	0.00318836	0.00307666	0.00297062	0.00286988	0.0027741	0.00268297	0.00259621	0.00251356	0.00243476	0.00235958	0.00228782	0.00221927	0.00215376	0.00209111	0.00203116	0.00197376	0.00191878	0.00186608	0.00181555	0.00176706	0.00172051	0.00167581	0.00163285	0.00159155	0.00155184	0.00151362	0.00147683	0.00144139	0.00140725	0.00137434	0.00134261	0.001312	0.00128245	0.00125393	0.00122638	0.00119977	0.00117404	0.00114917	0.00112511	0.00110183	0.0010793	0.00105749
	2.84362	0.00403424	0.00387751	0.00372947	0.00358951	0.00345708	0.00333166	0.0032128	0.00310005	0.00299302	0.00289135	0.00279469	0.00270273	0.00261518	0.00253178	0.00245227	0.00237643	0.00230403	0.00223488	0.0021688	0.0021056	0.00204513	0.00198725	0.00193179	0.00187865	0.00182768	0.00177879	0.00173185	0.00168678	0.00164347	0.00160183	0.00156179	0.00152326	0.00148617	0.00145046	0.00141604	0.00138287	0.00135089	0.00132004	0.00129026	0.00126152	0.00123376	0.00120694	0.00118102	0.00115596	0.00113172	0.00110826	0.00108557	0.00106359
	2.86776	0.00406687	0.00390861	0.00375912	0.00361781	0.00348411	0.0033575	0.00323751	0.0031237	0.00301567	0.00291305	0.0028155	0.0027227	0.00263436	0.0025502	0.00246997	0.00239345	0.00232041	0.00225065	0.00218399	0.00212024	0.00205925	0.00200086	0.00194493	0.00189134	0.00183994	0.00179064	0.00174331	0.00169786	0.00165419	0.00161221	0.00157184	0.001533	0.00149561	0.00145961	0.00142492	0.00139148	0.00135925	0.00132815	0.00129815	0.00126918	0.0012412	0.00121418	0.00118806	0.0011628	0.00113838	0.00111475	0.00109188	0.00106974
	2.89192	0.00409988	0.00394007	0.00378912	0.00364644	0.00351145	0.00338363	0.00326249	0.00314761	0.00303857	0.00293499	0.00283654	0.00274288	0.00265373	0.00256881	0.00248786	0.00241066	0.00233696	0.00226659	0.00219934	0.00213503	0.00207351	0.00201462	0.00195821	0.00190415	0.00185232	0.0018026	0.00175487	0.00170904	0.00166501	0.00162269	0.00158199	0.00154283	0.00150514	0.00146884	0.00143387	0.00140017	0.00136768	0.00133634	0.0013061	0.0012769	0.00124871	0.00122148	0.00119515	0.00116971	0.0011451	0.00112129	0.00109825	0.00107595
	2.9161	0.00413329	0.00397189	0.00381947	0.0036754	0.0035391	0.00341005	0.00328776	0.00317179	0.00306172	0.00295718	0.00285781	0.00276329	0.00267332	0.00258763	0.00250594	0.00242804	0.00235369	0.00228269	0.00221484	0.00214997	0.00208791	0.00202851	0.00197161	0.00191709	0.00186482	0.00181468	0.00176655	0.00172034	0.00167594	0.00163326	0.00159223	0.00155275	0.00151475	0.00147816	0.00144291	0.00140894	0.00137619	0.0013446	0.00131412	0.0012847	0.00125629	0.00122884	0.00120232	0.00117668	0.00115188	0.00112789	0.00110468	0.00108221
	2.94031	0.00416709	0.0040041	0.00385018	0.00370469	0.00356707	0.00343678	0.00331332	0.00319624	0.00308514	0.00297961	0.00287931	0.00278392	0.00269312	0.00260664	0.00252422	0.00244561	0.00237059	0.00229895	0.00223051	0.00216507	0.00210246	0.00204254	0.00198515	0.00193017	0.00187745	0.00182688	0.00177834	0.00173174	0.00168697	0.00164394	0.00160257	0.00156276	0.00152445	0.00148757	0.00145204	0.00141779	0.00138478	0.00135294	0.00132222	0.00129256	0.00126393	0.00123627	0.00120954	0.0011837	0.00115872	0.00113455	0.00111116	0.00108852
	2.96454	0.0042013	0.00403668	0.00388124	0.00373433	0.00359537	0.00346381	0.00333917	0.00322097	0.00310881	0.00300229	0.00290105	0.00280477	0.00271314	0.00262586	0.00254269	0.00246336	0.00238767	0.00231539	0.00224634	0.00218032	0.00211716	0.00205672	0.00199883	0.00194337	0.0018902	0.00183919	0.00179025	0.00174325	0.00169811	0.00165472	0.001613	0.00157287	0.00153425	0.00149706	0.00146124	0.00142672	0.00139345	0.00136135	0.00133039	0.0013005	0.00127164	0.00124377	0.00121683	0.00119079	0.00116562	0.00114126	0.0011177	0.00109488
	2.9888	0.00423591	0.00406965	0.00391267	0.00376431	0.00362399	0.00349116	0.00336531	0.00324598	0.00313275	0.00302522	0.00292304	0.00282585	0.00273337	0.00264529	0.00256135	0.00248131	0.00240493	0.002332	0.00226233	0.00219572	0.00213201	0.00207104	0.00201265	0.0019567	0.00190307	0.00185164	0.00180227	0.00175488	0.00170936	0.00166561	0.00162354	0.00158308	0.00154414	0.00150665	0.00147054	0.00143574	0.00140219	0.00136984	0.00133863	0.00130851	0.00127942	0.00125133	0.00122419	0.00119795	0.00117258	0.00114803	0.00112429	0.0011013
	3.01308	0.00427094	0.00410301	0.00394447	0.00379464	0.00365294	0.00351882	0.00339175	0.00327127	0.00315696	0.00304841	0.00294526	0.00284717	0.00275382	0.00266493	0.00258022	0.00249944	0.00242237	0.00234879	0.00227849	0.00221129	0.00214702	0.0020855	0.0020266	0.00197017	0.00191608	0.0018642	0.00181442	0.00176662	0.00172071	0.0016766	0.00163418	0.00159338	0.00155412	0.00151632	0.00147992	0.00144484	0.00141102	0.00137841	0.00134695	0.00131659	0.00128728	0.00125896	0.0012316	0.00120516	0.0011796	0.00115487	0.00113094	0.00110778
	3.03738	0.00430639	0.00413677	0.00397664	0.00382533	0.00368224	0.00354679	0.00341849	0.00329685	0.00318144	0.00307186	0.00296773	0.00286872	0.0027745	0.00268478	0.00259929	0.00251777	0.00244	0.00236575	0.00229482	0.00222702	0.00216217	0.00210012	0.0020407	0.00198378	0.00192922	0.00187689	0.00182668	0.00177848	0.00173218	0.00168769	0.00164492	0.00160378	0.0015642	0.00152609	0.00148939	0.00145402	0.00141993	0.00138706	0.00135535	0.00132474	0.0012952	0.00126666	0.00123909	0.00121244	0.00118668	0.00116176	0.00113765	0.00111431
	3.0617	0.00434227	0.00417094	0.0040092	0.00385638	0.00371187	0.0035751	0.00344554	0.00332272	0.0032062	0.00309557	0.00299045	0.0028905	0.0027954	0.00270485	0.00261856	0.0025363	0.00245782	0.00238289	0.00231132	0.00224291	0.00217749	0.00211489	0.00205495	0.00199752	0.00194249	0.00188971	0.00183907	0.00179045	0.00174376	0.0016989	0.00165577	0.00161429	0.00157437	0.00153595	0.00149894	0.00146329	0.00142892	0.00139579	0.00136382	0.00133297	0.00130319	0.00127443	0.00124664	0.00121979	0.00119382	0.00116871	0.00114441	0.0011209
	3.08605	0.00437858	0.00420551	0.00404214	0.0038878	0.00374185	0.00360373	0.0034729	0.00334889	0.00323124	0.00311955	0.00301343	0.00291253	0.00281653	0.00272513	0.00263805	0.00255503	0.00247582	0.00240021	0.002328	0.00225897	0.00219296	0.0021298	0.00206933	0.00201141	0.00195589	0.00190265	0.00185157	0.00180254	0.00175546	0.00171021	0.00166672	0.00162489	0.00158464	0.0015459	0.00150859	0.00147265	0.001438	0.0014046	0.00137237	0.00134128	0.00131126	0.00128227	0.00125426	0.0012272	0.00120103	0.00117572	0.00115124	0.00112754
	3.11042	0.00441533	0.0042405	0.00407548	0.00391958	0.00377218	0.00363269	0.00350058	0.00337535	0.00325657	0.0031438	0.00303666	0.00293481	0.0028379	0.00274564	0.00265775	0.00257395	0.00249402	0.00241772	0.00234485	0.0022752	0.0022086	0.00214487	0.00208387	0.00202543	0.00196943	0.00191573	0.00186421	0.00181476	0.00176726	0.00172164	0.00167778	0.00163559	0.00159501	0.00155595	0.00151833	0.00148209	0.00144716	0.00141348	0.001381	0.00134966	0.0013194	0.00129018	0.00126195	0.00123467	0.0012083	0.0011828	0.00115812	0.00113425
	3.13481	0.00445253	0.00427591	0.00410921	0.00395175	0.00380287	0.00366199	0.00352858	0.00340212	0.00328218	0.00316832	0.00306016	0.00295733	0.0028595	0.00276638	0.00267766	0.00259309	0.00251242	0.00243542	0.00236188	0.0022916	0.0022244	0.0021601	0.00209855	0.0020396	0.00198311	0.00192893	0.00187697	0.00182709	0.00177919	0.00173317	0.00168894	0.0016464	0.00160548	0.00156609	0.00152816	0.00149162	0.00145641	0.00142246	0.00138971	0.00135811	0.00132761	0.00129816	0.00126971	0.00124221	0.00121564	0.00118993	0.00116507	0.00114101
	3.15923	0.00449018	0.00431175	0.00414335	0.00398429	0.00383392	0.00369164	0.0035569	0.0034292	0.00330809	0.00319312	0.00308391	0.0029801	0.00288135	0.00278734	0.00269779	0.00261243	0.00253101	0.0024533	0.00237909	0.00230817	0.00224036	0.00217549	0.00211339	0.00205391	0.00199692	0.00194228	0.00188986	0.00183954	0.00179123	0.00174482	0.00170021	0.00165732	0.00161605	0.00157633	0.00153809	0.00150125	0.00146574	0.00143151	0.0013985	0.00136665	0.0013359	0.00130621	0.00127754	0.00124983	0.00122304	0.00119713	0.00117208	0.00114783
	3.18367	0.00452829	0.00434802	0.0041779	0.00401723	0.00386534	0.00372163	0.00358555	0.0034566	0.00333429	0.0032182	0.00310794	0.00300313	0.00290343	0.00280853	0.00271814	0.00263198	0.0025498	0.00247137	0.00239648	0.00232491	0.00225649	0.00219103	0.00212838	0.00206838	0.00201088	0.00195575	0.00190287	0.00185212	0.0018034	0.00175659	0.0017116	0.00166834	0.00162672	0.00158667	0.00154811	0.00151096	0.00147516	0.00144065	0.00140737	0.00137526	0.00134427	0.00131434	0.00128544	0.0012575	0.00123051	0.0012044	0.00117915	0.00115471
	3.20813	0.00456687	0.00438474	0.00421287	0.00405056	0.00389713	0.00375198	0.00361454	0.00348431	0.0033608	0.00324358	0.00313224	0.00302642	0.00292577	0.00282996	0.00273871	0.00265174	0.0025688	0.00248964	0.00241406	0.00234184	0.00227279	0.00220674	0.00214353	0.00208298	0.00202498	0.00196936	0.00191602	0.00186483	0.00181568	0.00176847	0.00172309	0.00167946	0.0016375	0.00159711	0.00155822	0.00152077	0.00148467	0.00144988	0.00141633	0.00138395	0.00135271	0.00132254	0.00129341	0.00126525	0.00123804	0.00121173	0.00118628	0.00116165
	3.23261	0.00460593	0.0044219	0.00424826	0.00408429	0.0039293	0.00378268	0.00364387	0.00351234	0.00338761	0.00326924	0.00315682	0.00304997	0.00294835	0.00285163	0.00275951	0.00267172	0.002588	0.00250811	0.00243183	0.00235894	0.00228926	0.00222262	0.00215883	0.00209775	0.00203922	0.00198311	0.0019293	0.00187766	0.00182809	0.00178047	0.0017347	0.0016907	0.00164838	0.00160765	0.00156843	0.00153067	0.00149427	0.00145919	0.00142536	0.00139273	0.00136123	0.00133082	0.00130145	0.00127307	0.00124564	0.00121912	0.00119347	0.00116866
	3.25712	0.00464546	0.00445952	0.00428408	0.00411842	0.00396186	0.00381375	0.00367354	0.0035407	0.00341473	0.00329519	0.00318167	0.00307379	0.00297118	0.00287354	0.00278054	0.00269192	0.00260741	0.00252678	0.00244978	0.00237623	0.00230591	0.00223866	0.00217429	0.00211266	0.00205361	0.00199701	0.00194272	0.00189063	0.00184062	0.00179258	0.00174642	0.00170205	0.00165936	0.00161829	0.00157874	0.00154066	0.00150397	0.00146859	0.00143449	0.00140158	0.00136983	0.00133917	0.00130957	0.00128096	0.00125332	0.00122659	0.00120073	0.00117572
	3.28165	0.00468549	0.00449759	0.00432034	0.00415297	0.0039948	0.00384519	0.00370357	0.00356939	0.00344217	0.00332145	0.00320681	0.00309787	0.00299428	0.00289569	0.00280181	0.00271234	0.00262704	0.00254564	0.00246793	0.0023937	0.00232274	0.00225487	0.00218992	0.00212773	0.00206815	0.00201104	0.00195627	0.00190372	0.00185327	0.00180482	0.00175826	0.0017135	0.00167045	0.00162903	0.00158915	0.00155075	0.00151375	0.00147808	0.0014437	0.00141052	0.00137851	0.0013476	0.00131776	0.00128892	0.00126106	0.00123411	0.00120806	0.00118285
	3.30621	0.00472601	0.00453614	0.00435704	0.00418794	0.00402814	0.00387701	0.00373394	0.00359842	0.00346992	0.00334801	0.00323224	0.00312224	0.00301763	0.00291809	0.00282331	0.00273299	0.00264688	0.00256472	0.00248628	0.00241136	0.00233974	0.00227125	0.0022057	0.00214295	0.00208284	0.00202522	0.00196996	0.00191695	0.00186606	0.00181718	0.00177022	0.00172507	0.00168166	0.00163988	0.00159966	0.00156094	0.00152363	0.00148766	0.00145299	0.00141954	0.00138727	0.00135611	0.00132602	0.00129696	0.00126887	0.00124171	0.00121545	0.00119004
	3.33079	0.00476703	0.00457517	0.00439419	0.00422333	0.00406188	0.0039092	0.00376468	0.00362779	0.003498	0.00337487	0.00325796	0.00314687	0.00304125	0.00294075	0.00284505	0.00275387	0.00266694	0.002584	0.00250483	0.0024292	0.00235692	0.0022878	0.00222166	0.00215834	0.00209768	0.00203954	0.0019838	0.00193031	0.00187897	0.00182967	0.0017823	0.00173676	0.00169297	0.00165083	0.00161028	0.00157122	0.0015336	0.00149734	0.00146237	0.00142865	0.00139611	0.0013647	0.00133437	0.00130507	0.00127675	0.00124938	0.0012229	0.0011973
	3.35539	0.00480857	0.00461467	0.00443179	0.00425915	0.00409603	0.00394178	0.00379579	0.0036575	0.00352641	0.00340205	0.00328398	0.0031718	0.00306514	0.00296365	0.00286703	0.00277498	0.00268722	0.00260349	0.00252358	0.00244724	0.00237429	0.00230453	0.00223778	0.00217388	0.00211267	0.00205402	0.00199777	0.00194381	0.00189202	0.00184228	0.00179449	0.00174856	0.00170439	0.00166189	0.00162099	0.00158161	0.00154366	0.0015071	0.00147184	0.00143784	0.00140503	0.00137337	0.00134279	0.00131325	0.0012847	0.00125711	0.00123043	0.00120462
	3.38002	0.00485063	0.00465467	0.00446986	0.00429541	0.0041306	0.00397475	0.00382726	0.00368757	0.00355516	0.00342954	0.00331029	0.003197	0.00308929	0.00298682	0.00288926	0.00279632	0.00270772	0.0026232	0.00254253	0.00246548	0.00239185	0.00232144	0.00225408	0.00218959	0.00212783	0.00206864	0.00201189	0.00195744	0.00190519	0.00185502	0.00180681	0.00176048	0.00171593	0.00167306	0.00163181	0.00159209	0.00155383	0.00151696	0.00148141	0.00144712	0.00141404	0.00138211	0.00135128	0.0013215	0.00129273	0.00126492	0.00123802	0.001212
	3.40466	0.00489321	0.00469516	0.0045084	0.00433212	0.00416558	0.00400812	0.00385911	0.00371799	0.00358424	0.00345736	0.00333692	0.0032225	0.00311373	0.00301025	0.00291174	0.0028179	0.00272845	0.00264312	0.00256169	0.00248391	0.00240959	0.00233853	0.00227054	0.00220547	0.00214314	0.00208341	0.00202615	0.00197122	0.0019185	0.00186788	0.00181925	0.00177252	0.00172758	0.00168434	0.00164274	0.00160268	0.00156409	0.00152691	0.00149106	0.00145649	0.00142313	0.00139094	0.00135986	0.00132984	0.00130083	0.00127279	0.00124568	0.00121946
	3.42934	0.00493634	0.00473617	0.00454742	0.00436927	0.00420099	0.00404189	0.00389135	0.00374878	0.00361366	0.0034855	0.00336385	0.00324829	0.00313844	0.00303395	0.00293448	0.00283972	0.00274941	0.00266327	0.00258105	0.00250254	0.00242753	0.0023558	0.00228718	0.00222151	0.00215861	0.00209834	0.00204056	0.00198514	0.00193195	0.00188088	0.00183182	0.00178467	0.00173934	0.00169574	0.00165377	0.00161337	0.00157445	0.00153695	0.0015008	0.00146594	0.00143231	0.00139985	0.00136852	0.00133825	0.00130901	0.00128074	0.00125341	0.00122698
	3.45403	0.00498	0.00477768	0.00458692	0.00440689	0.00423684	0.00407608	0.00392397	0.00377994	0.00364344	0.00351397	0.0033911	0.00327438	0.00316344	0.00305791	0.00295747	0.00286179	0.0027706	0.00268363	0.00260064	0.00252138	0.00244566	0.00237326	0.002304	0.00223772	0.00217424	0.00211342	0.00205512	0.0019992	0.00194553	0.00189401	0.00184452	0.00179695	0.00175123	0.00170724	0.00166491	0.00162416	0.00158491	0.0015471	0.00151064	0.00147549	0.00144158	0.00140885	0.00137725	0.00134674	0.00131726	0.00128876	0.00126121	0.00123457
	3.47875	0.00502422	0.00481972	0.00462691	0.00444496	0.00427312	0.00411068	0.00395699	0.00381146	0.00367356	0.00354278	0.00341866	0.00330078	0.00318873	0.00308216	0.00298072	0.00288411	0.00279203	0.00270423	0.00262043	0.00254042	0.00246398	0.0023909	0.002321	0.0022541	0.00219004	0.00212867	0.00206983	0.0020134	0.00195925	0.00190727	0.00185734	0.00180936	0.00176323	0.00171886	0.00167616	0.00163506	0.00159548	0.00155734	0.00152058	0.00148513	0.00145093	0.00141793	0.00138607	0.00135531	0.00132558	0.00129686	0.00126908	0.00124222
	3.50349	0.00506901	0.00486228	0.0046674	0.00448352	0.00430985	0.0041457	0.0039904	0.00384337	0.00370405	0.00357193	0.00344655	0.00332748	0.00321431	0.00310667	0.00300424	0.00290668	0.00281371	0.00272505	0.00264045	0.00255968	0.00248251	0.00240874	0.00233819	0.00227066	0.00220601	0.00214407	0.0020847	0.00202775	0.00197312	0.00192067	0.00187029	0.00182189	0.00177535	0.00173059	0.00168753	0.00164607	0.00160614	0.00156768	0.0015306	0.00149486	0.00146037	0.0014271	0.00139497	0.00136395	0.00133399	0.00130502	0.00127703	0.00124995
	3.52826	0.00511436	0.00490539	0.0047084	0.00452255	0.00434703	0.00418115	0.00402422	0.00387566	0.0037349	0.00360143	0.00347477	0.00335449	0.00324018	0.00313147	0.00302802	0.0029295	0.00283562	0.0027461	0.00266069	0.00257914	0.00250124	0.00242677	0.00235555	0.0022874	0.00222215	0.00215963	0.00209972	0.00204226	0.00198713	0.0019342	0.00188338	0.00183454	0.00178759	0.00174244	0.001699	0.00165718	0.00161692	0.00157812	0.00154073	0.00150468	0.0014699	0.00143635	0.00140396	0.00137268	0.00134247	0.00131327	0.00128504	0.00125775
	3.55305	0.00516029	0.00494904	0.00474992	0.00456206	0.00438468	0.00421703	0.00405846	0.00390834	0.00376612	0.00363127	0.00350332	0.00338182	0.00326636	0.00315656	0.00305208	0.00295259	0.00285778	0.00276739	0.00268115	0.00259882	0.00252017	0.002445	0.00237311	0.00230432	0.00223845	0.00217536	0.00211489	0.00205691	0.00200128	0.00194788	0.0018966	0.00184732	0.00179996	0.00175441	0.00171059	0.00166841	0.00162779	0.00158866	0.00155095	0.0015146	0.00147953	0.00144569	0.00141303	0.00138149	0.00135103	0.00132159	0.00129313	0.00126562
	3.57786	0.00520682	0.00499325	0.00479196	0.00460208	0.00442279	0.00425336	0.00409311	0.00394142	0.00379772	0.00366148	0.00353221	0.00340947	0.00329284	0.00318194	0.00307641	0.00297593	0.0028802	0.00278892	0.00270184	0.00261871	0.00253931	0.00246342	0.00239085	0.00232141	0.00225494	0.00219126	0.00213023	0.00207172	0.00201558	0.00196169	0.00190995	0.00186024	0.00181245	0.0017665	0.00172229	0.00167975	0.00163878	0.00159931	0.00156128	0.00152461	0.00148924	0.00145512	0.00142219	0.00139039	0.00135967	0.00132999	0.0013013	0.00127356
	3.60269	0.00525394	0.00503802	0.00483453	0.00464259	0.00446137	0.00429013	0.00412818	0.0039749	0.00382969	0.00369204	0.00356144	0.00343744	0.00331963	0.00320761	0.00310103	0.00299955	0.00290287	0.00281069	0.00272276	0.00263883	0.00255866	0.00248205	0.00240879	0.00233869	0.00227159	0.00220732	0.00214573	0.00208668	0.00203003	0.00197565	0.00192344	0.00187328	0.00182507	0.00177871	0.00173412	0.00169119	0.00164987	0.00161006	0.0015717	0.00153472	0.00149905	0.00146464	0.00143143	0.00139936	0.00136839	0.00133847	0.00130954	0.00128157
	3.62755	0.00530167	0.00508336	0.00487765	0.00468361	0.00450044	0.00432736	0.00416369	0.00400879	0.00386206	0.00372297	0.00359102	0.00346575	0.00334673	0.00323358	0.00312593	0.00302343	0.00292579	0.00283271	0.00274392	0.00265917	0.00257823	0.00250088	0.00242692	0.00235616	0.00228843	0.00222356	0.0021614	0.0021018	0.00204462	0.00198976	0.00193707	0.00188646	0.00183782	0.00179105	0.00174606	0.00170276	0.00166107	0.00162092	0.00158222	0.00154492	0.00150895	0.00147425	0.00144076	0.00140843	0.0013772	0.00134702	0.00131786	0.00128966
	3.65243	0.00535001	0.00512929	0.00492131	0.00472516	0.00453999	0.00436506	0.00419964	0.00404309	0.00389482	0.00375427	0.00362095	0.00349439	0.00337416	0.00325985	0.00315111	0.00304759	0.00294898	0.00285498	0.00276531	0.00267974	0.00259801	0.00251992	0.00244525	0.00237382	0.00230545	0.00223997	0.00217723	0.00211707	0.00205938	0.00200401	0.00195084	0.00189977	0.0018507	0.00180351	0.00175812	0.00171444	0.00167238	0.00163188	0.00159285	0.00155523	0.00151895	0.00148396	0.00145018	0.00141757	0.00138608	0.00135566	0.00132625	0.00129782
	3.67734	0.00539899	0.00517581	0.00496553	0.00476722	0.00458005	0.00440322	0.00423602	0.00407781	0.00392797	0.00378595	0.00365124	0.00352337	0.0034019	0.00328643	0.00317659	0.00307203	0.00297243	0.00287749	0.00278695	0.00270053	0.00261801	0.00253917	0.00246378	0.00239167	0.00232265	0.00225656	0.00219323	0.00213251	0.00207428	0.0020184	0.00196476	0.00191322	0.0018637	0.00181609	0.0017703	0.00172623	0.00168381	0.00164295	0.00160358	0.00156564	0.00152905	0.00149375	0.00145969	0.00142681	0.00139505	0.00136438	0.00133473	0.00130606
	3.70227	0.0054486	0.00522292	0.00501031	0.00480983	0.0046206	0.00444186	0.00427287	0.00411296	0.00396153	0.00381802	0.0036819	0.0035527	0.00342998	0.00331333	0.00320237	0.00309675	0.00299615	0.00290027	0.00280883	0.00272157	0.00263824	0.00255863	0.00248252	0.00240972	0.00234004	0.00227332	0.00220939	0.00214812	0.00208935	0.00203295	0.00197881	0.00192681	0.00187685	0.00182881	0.0017826	0.00173815	0.00169535	0.00165413	0.00161442	0.00157615	0.00153924	0.00150365	0.00146929	0.00143613	0.00140411	0.00137318	0.00134328	0.00131438
	3.72722	0.00549886	0.00527065	0.00505567	0.00485297	0.00466168	0.00448098	0.00431016	0.00414854	0.0039955	0.00385047	0.00371292	0.00358238	0.00345839	0.00334054	0.00322844	0.00312176	0.00302015	0.00292331	0.00283096	0.00274283	0.00265869	0.0025783	0.00250146	0.00242796	0.00235762	0.00229026	0.00222574	0.00216389	0.00210457	0.00204765	0.00199302	0.00194054	0.00189012	0.00184165	0.00179503	0.00175018	0.001707	0.00166542	0.00162537	0.00158676	0.00154954	0.00151363	0.00147899	0.00144555	0.00141325	0.00138206	0.00135191	0.00132277
	3.7522	0.00554978	0.005319	0.00510162	0.00489667	0.00470327	0.0045206	0.00434793	0.00418457	0.00402989	0.00388332	0.00374432	0.00361241	0.00348713	0.00336807	0.00325483	0.00314706	0.00304442	0.00294661	0.00285334	0.00276434	0.00267937	0.0025982	0.00252061	0.0024464	0.00237539	0.00230739	0.00224226	0.00217982	0.00211995	0.00206251	0.00200737	0.00195442	0.00190354	0.00185463	0.00180759	0.00176233	0.00171878	0.00167683	0.00163642	0.00159748	0.00155993	0.00152372	0.00148878	0.00145505	0.00142248	0.00139102	0.00136063	0.00133124
	3.77719	0.00560136	0.00536798	0.00514816	0.00494093	0.00474539	0.00456072	0.00438616	0.00422104	0.0040647	0.00391657	0.0037761	0.00364281	0.00351622	0.00339593	0.00328152	0.00317265	0.00306897	0.00297018	0.00287597	0.00278609	0.00270029	0.00261832	0.00253997	0.00246505	0.00239335	0.00232471	0.00225895	0.00219593	0.0021355	0.00207752	0.00202187	0.00196843	0.00191709	0.00186773	0.00182027	0.00177461	0.00173067	0.00168835	0.00164758	0.0016083	0.00157043	0.0015339	0.00149866	0.00146464	0.0014318	0.00140008	0.00136942	0.00133979
	3.80222	0.00565363	0.0054176	0.0051953	0.00498575	0.00478804	0.00460134	0.00442488	0.00425796	0.00409994	0.00395023	0.00380827	0.00367357	0.00354566	0.00342411	0.00330853	0.00319854	0.00309381	0.00299402	0.00289887	0.00280809	0.00272144	0.00263866	0.00255955	0.0024839	0.00241151	0.00234221	0.00227583	0.00221221	0.00215121	0.0020927	0.00203653	0.0019826	0.00193078	0.00188098	0.00183309	0.00178702	0.00174268	0.00169998	0.00165886	0.00161923	0.00158103	0.00154418	0.00150864	0.00147433	0.00144121	0.00140921	0.0013783	0.00134843
	3.82726	0.00570659	0.00546786	0.00524306	0.00503116	0.00483125	0.00464248	0.00446408	0.00429535	0.00413562	0.0039843	0.00384083	0.00370471	0.00357545	0.00345264	0.00333586	0.00322474	0.00311894	0.00301813	0.00292202	0.00283034	0.00274282	0.00265923	0.00257935	0.00250296	0.00242987	0.0023599	0.00229289	0.00222867	0.00216709	0.00210803	0.00205134	0.00199691	0.00194462	0.00189436	0.00184603	0.00179955	0.00175481	0.00171173	0.00167025	0.00163027	0.00159173	0.00155457	0.00151871	0.00148411	0.0014507	0.00141844	0.00138727	0.00135714
	3.85233	0.00576025	0.00551879	0.00529143	0.00507715	0.004875	0.00468414	0.00450378	0.0043332	0.00417174	0.00401879	0.00387379	0.00373622	0.0036056	0.0034815	0.00336351	0.00325124	0.00314436	0.00304253	0.00294545	0.00285284	0.00276445	0.00268004	0.00259936	0.00252223	0.00244843	0.00237779	0.00231013	0.0022453	0.00218315	0.00212352	0.00206631	0.00201137	0.00195859	0.00190788	0.00185911	0.0018122	0.00176706	0.0017236	0.00168175	0.00164142	0.00160254	0.00156505	0.00152889	0.00149399	0.00146029	0.00142775	0.00139632	0.00136594
	3.87743	0.00581463	0.0055704	0.00534045	0.00512374	0.00491932	0.00472634	0.00454398	0.00437153	0.00420831	0.00405371	0.00390715	0.00376811	0.00363612	0.00351071	0.00339149	0.00327806	0.00317008	0.0030672	0.00296914	0.00287561	0.00278633	0.00270107	0.00261961	0.00254171	0.0024672	0.00239587	0.00232757	0.00226211	0.00219937	0.00213919	0.00208143	0.00202598	0.00197272	0.00192154	0.00187232	0.00182499	0.00177944	0.00173559	0.00169336	0.00165268	0.00161346	0.00157564	0.00153916	0.00150396	0.00146998	0.00143716	0.00140545	0.00137481
	3.90254	0.00586973	0.00562268	0.0053901	0.00517093	0.00496422	0.00476907	0.0045847	0.00441034	0.00424534	0.00408906	0.00394092	0.0038004	0.003667	0.00354028	0.0034198	0.0033052	0.0031961	0.00309217	0.00299311	0.00289863	0.00280846	0.00272235	0.00264008	0.00256142	0.00248617	0.00241415	0.00234519	0.00227911	0.00221577	0.00215501	0.00209672	0.00204075	0.00198699	0.00193534	0.00188568	0.00183791	0.00179195	0.00174771	0.0017051	0.00166405	0.00162448	0.00158633	0.00154954	0.00151403	0.00147975	0.00144665	0.00141468	0.00138378
	3.92768	0.00592556	0.00567566	0.00544041	0.00521874	0.00500969	0.00481236	0.00462593	0.00444965	0.00428283	0.00412485	0.00397511	0.00383308	0.00369826	0.0035702	0.00344846	0.00333265	0.00322243	0.00311743	0.00301736	0.00292192	0.00283084	0.00274387	0.00266078	0.00258134	0.00250536	0.00243264	0.002363	0.00229629	0.00223234	0.00217101	0.00211217	0.00205567	0.00200142	0.00194928	0.00189916	0.00185096	0.00180458	0.00175994	0.00171695	0.00167553	0.00163562	0.00159713	0.00156001	0.0015242	0.00148962	0.00145624	0.00142399	0.00139283
	3.95285	0.00598215	0.00572935	0.00549138	0.00526718	0.00505575	0.0048562	0.00466768	0.00448945	0.0043208	0.00416109	0.00400972	0.00386616	0.0037299	0.00360048	0.00347745	0.00336044	0.00324906	0.00314299	0.00304189	0.00294548	0.00285348	0.00276563	0.00268171	0.00260149	0.00252476	0.00245133	0.00238102	0.00231366	0.0022491	0.00218718	0.00212778	0.00207076	0.00201599	0.00196337	0.00191279	0.00186415	0.00181735	0.0017723	0.00172892	0.00168714	0.00164687	0.00160804	0.00157059	0.00153446	0.00149959	0.00146592	0.00143339	0.00140196
	3.97804	0.0060395	0.00578375	0.00554303	0.00531626	0.00510242	0.00490061	0.00470998	0.00452976	0.00435924	0.00419778	0.00404477	0.00389965	0.00376193	0.00363112	0.0035068	0.00338856	0.00327602	0.00316884	0.0030667	0.00296931	0.00287637	0.00278764	0.00270288	0.00262186	0.00254437	0.00247022	0.00239923	0.00233122	0.00226604	0.00220353	0.00214356	0.002086	0.00203072	0.00197761	0.00192656	0.00187747	0.00183024	0.00178479	0.00174102	0.00169886	0.00165822	0.00161905	0.00158128	0.00154483	0.00150965	0.00147569	0.00144288	0.00141119
	4.00325	0.00609763	0.00583888	0.00559537	0.00536598	0.0051497	0.00494559	0.00475281	0.00457058	0.00439817	0.00423493	0.00408025	0.00393356	0.00379435	0.00366215	0.0035365	0.00341701	0.0033033	0.003195	0.00309181	0.00299342	0.00289953	0.00280991	0.0027243	0.00264247	0.00256421	0.00248933	0.00241764	0.00234897	0.00228316	0.00222005	0.00215951	0.00210141	0.00204561	0.001992	0.00194048	0.00189093	0.00184327	0.0017974	0.00175324	0.00171069	0.0016697	0.00163018	0.00159207	0.0015553	0.00151982	0.00148556	0.00145247	0.0014205
	4.02848	0.00615654	0.00589475	0.0056484	0.00541635	0.00519759	0.00499116	0.0047962	0.00461193	0.0044376	0.00427255	0.00411617	0.00396788	0.00382717	0.00369355	0.00356656	0.00344581	0.0033309	0.00322148	0.00311721	0.0030178	0.00292297	0.00283243	0.00274595	0.0026633	0.00258427	0.00250865	0.00243626	0.00236692	0.00230047	0.00223675	0.00217564	0.00211698	0.00206065	0.00200654	0.00195454	0.00190454	0.00185644	0.00181015	0.00176558	0.00172265	0.00168129	0.00164142	0.00160297	0.00156588	0.00153008	0.00149552	0.00146215	0.0014299
	4.05374	0.00621625	0.00595138	0.00570214	0.0054674	0.00524612	0.00503733	0.00484016	0.0046538	0.00447753	0.00431065	0.00415254	0.00400264	0.00386039	0.00372533	0.00359699	0.00347495	0.00335883	0.00324826	0.00314291	0.00304248	0.00294667	0.00285521	0.00276786	0.00268438	0.00260456	0.00252819	0.00245508	0.00238506	0.00231797	0.00225364	0.00219193	0.00213272	0.00207586	0.00202124	0.00196875	0.00191828	0.00186974	0.00182302	0.00177805	0.00173473	0.001693	0.00165277	0.00161398	0.00157655	0.00154044	0.00150558	0.00147192	0.00143939
	4.07902	0.00627678	0.00600877	0.0057566	0.00551913	0.00529528	0.00508409	0.00488468	0.00469622	0.00451796	0.00434923	0.00418937	0.00403782	0.00389403	0.00375751	0.00362779	0.00350445	0.0033871	0.00327537	0.00316892	0.00306744	0.00297065	0.00287825	0.00279002	0.00270569	0.00262507	0.00254794	0.00247411	0.00240341	0.00233566	0.00227071	0.00220841	0.00214862	0.00209123	0.00203609	0.00198311	0.00193217	0.00188318	0.00183603	0.00179064	0.00174693	0.00170482	0.00166423	0.00162509	0.00158734	0.00155091	0.00151574	0.00148179	0.00144898
	4.10433	0.00633814	0.00606694	0.0058118	0.00557154	0.0053451	0.00513148	0.00492978	0.00473918	0.00455892	0.00438829	0.00422667	0.00407345	0.00392808	0.00379008	0.00365896	0.0035343	0.0034157	0.00330279	0.00319523	0.0030927	0.0029949	0.00290156	0.00281243	0.00272725	0.00264582	0.00256792	0.00249336	0.00242196	0.00235355	0.00228796	0.00222506	0.0021647	0.00210676	0.0020511	0.00199762	0.00194621	0.00189676	0.00184917	0.00180337	0.00175926	0.00171677	0.00167581	0.00163632	0.00159823	0.00156148	0.00152601	0.00149175	0.00145866
	4.12965	0.00640034	0.0061259	0.00586774	0.00562466	0.00539557	0.00517948	0.00497547	0.0047827	0.0046004	0.00442786	0.00426443	0.00410952	0.00396256	0.00382305	0.00369052	0.00356452	0.00344466	0.00333055	0.00322186	0.00311826	0.00301945	0.00292515	0.0028351	0.00274906	0.0026668	0.00258812	0.00251282	0.00244071	0.00237163	0.00230541	0.0022419	0.00218096	0.00212246	0.00206627	0.00201229	0.00196039	0.00191048	0.00186245	0.00181623	0.00177172	0.00172884	0.00168751	0.00164767	0.00160924	0.00157216	0.00153637	0.00150181	0.00146843
	4.15501	0.00646339	0.00618566	0.00592443	0.00567849	0.00544672	0.00522812	0.00502176	0.00482678	0.00464241	0.00446793	0.00430268	0.00414605	0.00399747	0.00385643	0.00372246	0.0035951	0.00347396	0.00335864	0.00324881	0.00314412	0.00304428	0.002949	0.00285803	0.00277112	0.00268803	0.00260856	0.0025325	0.00245968	0.00238992	0.00232305	0.00225892	0.00219739	0.00213833	0.00208161	0.00202711	0.00197472	0.00192434	0.00187587	0.00182922	0.0017843	0.00174103	0.00169933	0.00165912	0.00162035	0.00158294	0.00154683	0.00151197	0.0014783
	4.18038	0.00652732	0.00624625	0.0059819	0.00573304	0.00549856	0.00527741	0.00506866	0.00487144	0.00468497	0.00450852	0.00434141	0.00418303	0.00403281	0.00389023	0.0037548	0.00362606	0.00350362	0.00338707	0.00327607	0.00317029	0.0030694	0.00297314	0.00288123	0.00279343	0.0027095	0.00262922	0.00255241	0.00247886	0.0024084	0.00234088	0.00227612	0.002214	0.00215437	0.00209711	0.00204209	0.00198921	0.00193835	0.00188943	0.00184235	0.00179701	0.00175334	0.00171126	0.0016707	0.00163157	0.00159383	0.0015574	0.00152223	0.00148827
	4.20578	0.00659213	0.00630767	0.00604015	0.00578834	0.00555108	0.00532735	0.00511617	0.00491669	0.00472809	0.00454963	0.00438064	0.00422049	0.0040686	0.00392445	0.00378754	0.00365741	0.00353364	0.00341585	0.00330367	0.00319676	0.00309483	0.00299756	0.0029047	0.002816	0.00273121	0.00265013	0.00257254	0.00249825	0.0024271	0.00235891	0.00229352	0.00223079	0.00217058	0.00211277	0.00205723	0.00200385	0.00195252	0.00190314	0.00185561	0.00180986	0.00176579	0.00172332	0.00168239	0.00164291	0.00160483	0.00156808	0.0015326	0.00149833
	4.23121	0.00665784	0.00636993	0.0060992	0.00584438	0.00560432	0.00537795	0.00516432	0.00496252	0.00477176	0.00459127	0.00442037	0.00425842	0.00410485	0.0039591	0.00382068	0.00368913	0.00356403	0.00344497	0.00333159	0.00322356	0.00312055	0.00302227	0.00292845	0.00283883	0.00275318	0.00267127	0.0025929	0.00251787	0.00244601	0.00237714	0.00231111	0.00224777	0.00218698	0.00212861	0.00207253	0.00201864	0.00196683	0.00191698	0.00186902	0.00182284	0.00177836	0.00173551	0.0016942	0.00165437	0.00161594	0.00157886	0.00154306	0.0015085
	4.25665	0.00672447	0.00643306	0.00615906	0.00590118	0.00565827	0.00542924	0.0052131	0.00500897	0.004816	0.00463345	0.00446061	0.00429684	0.00414155	0.00399418	0.00385424	0.00372125	0.00359479	0.00347445	0.00335986	0.00325068	0.00314658	0.00304727	0.00295247	0.00286193	0.00277539	0.00269265	0.00261348	0.0025377	0.00246512	0.00239557	0.00232889	0.00226493	0.00220355	0.00214461	0.002088	0.0020336	0.00198129	0.00193097	0.00188256	0.00183595	0.00179106	0.00174781	0.00170613	0.00166593	0.00162716	0.00158975	0.00155364	0.00151876
	4.28212	0.00679203	0.00649706	0.00621974	0.00595876	0.00571295	0.00548121	0.00526253	0.00505602	0.00486082	0.00467618	0.00450137	0.00433575	0.00417871	0.0040297	0.00388821	0.00375377	0.00362593	0.00350429	0.00338847	0.00327812	0.00317292	0.00307257	0.00297678	0.00288529	0.00279787	0.00271428	0.00263431	0.00255776	0.00248446	0.00241421	0.00234687	0.00228228	0.0022203	0.00216079	0.00210364	0.00204871	0.0019959	0.00194512	0.00189625	0.0018492	0.0018039	0.00176025	0.00171818	0.00167762	0.0016385	0.00160075	0.00156431	0.00152913
	4.30762	0.00686054	0.00656195	0.00628125	0.00601713	0.00576837	0.00553388	0.00531263	0.0051037	0.00490623	0.00471946	0.00454265	0.00437515	0.00421635	0.00406568	0.00392262	0.00378669	0.00365745	0.00353449	0.00341742	0.00330589	0.00319957	0.00309816	0.00300137	0.00290893	0.00282061	0.00273616	0.00265537	0.00257805	0.00250401	0.00243306	0.00236505	0.00229983	0.00223724	0.00217715	0.00211944	0.00206399	0.00201068	0.00195941	0.00191008	0.00186259	0.00181687	0.00177281	0.00173036	0.00168943	0.00164995	0.00161186	0.00157509	0.0015396
	4.33314	0.00693002	0.00662775	0.00634362	0.0060763	0.00582455	0.00558726	0.00536339	0.00515201	0.00495224	0.00476331	0.00458448	0.00441507	0.00425447	0.0041021	0.00395745	0.00382002	0.00368937	0.00356506	0.00344673	0.003334	0.00322655	0.00312406	0.00302625	0.00293285	0.00284361	0.00275829	0.00267668	0.00259857	0.00252378	0.00245212	0.00238344	0.00231757	0.00225436	0.00219369	0.00213542	0.00207943	0.00202561	0.00197385	0.00192405	0.00187612	0.00182997	0.00178551	0.00174266	0.00170136	0.00166152	0.00162308	0.00158599	0.00155017
	4.35868	0.00700047	0.00669447	0.00640686	0.00613628	0.0058815	0.00564136	0.00541484	0.00520096	0.00499886	0.00480774	0.00462684	0.0044555	0.00429307	0.004139	0.00399273	0.00385377	0.00372168	0.00359601	0.00347639	0.00336245	0.00325385	0.00315028	0.00305143	0.00295705	0.00286688	0.00278068	0.00269823	0.00261933	0.00254378	0.0024714	0.00240203	0.0023355	0.00227167	0.00221041	0.00215157	0.00209504	0.0020407	0.00198845	0.00193818	0.0018898	0.00184321	0.00179834	0.00175509	0.00171341	0.00167321	0.00163442	0.00159699	0.00156085
	4.38424	0.00707193	0.00676212	0.00647097	0.0061971	0.00593922	0.0056962	0.00546697	0.00525057	0.0050461	0.00485274	0.00466976	0.00449645	0.00433218	0.00417636	0.00402845	0.00388794	0.00375439	0.00362735	0.00350642	0.00339125	0.00328148	0.0031768	0.00307691	0.00298154	0.00289043	0.00280333	0.00272003	0.00264032	0.002564	0.0024909	0.00242083	0.00235364	0.00228918	0.00222731	0.0021679	0.00211082	0.00205596	0.0020032	0.00195246	0.00190361	0.00185659	0.0018113	0.00176765	0.00172558	0.00168501	0.00164587	0.0016081	0.00157164
	4.40983	0.0071444	0.00683073	0.00653599	0.00625875	0.00599774	0.00575179	0.00551982	0.00530084	0.00509396	0.00489835	0.00471324	0.00453793	0.00437178	0.0042142	0.00406462	0.00392255	0.00378751	0.00365907	0.00353682	0.0034204	0.00330945	0.00320365	0.0031027	0.00300632	0.00291425	0.00282625	0.00274209	0.00266156	0.00258446	0.00251061	0.00243984	0.00237198	0.00230688	0.0022444	0.00218441	0.00212677	0.00207138	0.00201812	0.00196688	0.00191758	0.00187011	0.00182439	0.00178034	0.00173788	0.00169694	0.00165744	0.00161933	0.00158253
	4.43545	0.0072179	0.00690031	0.00660191	0.00632126	0.00605707	0.00580814	0.00557338	0.00535179	0.00514247	0.00494456	0.00475729	0.00457996	0.0044119	0.00425252	0.00410125	0.00395759	0.00382105	0.00369119	0.0035676	0.0034499	0.00333775	0.00323082	0.00312879	0.00303139	0.00293835	0.00284943	0.0027644	0.00268304	0.00260515	0.00253055	0.00245907	0.00239053	0.00232478	0.00226168	0.00220109	0.0021429	0.00208697	0.00203319	0.00198147	0.00193169	0.00188378	0.00183763	0.00179317	0.00175031	0.00170899	0.00166913	0.00163067	0.00159354
	4.46108	0.00729245	0.00697088	0.00666876	0.00638465	0.00611722	0.00586526	0.00562767	0.00540343	0.00519162	0.00499138	0.00480192	0.00462253	0.00445254	0.00429134	0.00413836	0.00399307	0.003855	0.0037237	0.00359875	0.00347977	0.0033664	0.00325831	0.00315519	0.00305676	0.00296274	0.00287289	0.00278697	0.00270477	0.00262608	0.00255072	0.00247851	0.00240928	0.00234288	0.00227915	0.00221797	0.0021592	0.00210272	0.00204843	0.00199621	0.00194596	0.00189759	0.001851	0.00180612	0.00176287	0.00172116	0.00168094	0.00164212	0.00160466
	4.48674	0.00736808	0.00704245	0.00673655	0.00644892	0.0061782	0.00592317	0.0056827	0.00545577	0.00524143	0.00503882	0.00484714	0.00466566	0.00449371	0.00433066	0.00417593	0.00402901	0.00388939	0.00375663	0.0036303	0.00351001	0.00339541	0.00328615	0.00318192	0.00308243	0.00298742	0.00289662	0.00280981	0.00272675	0.00264726	0.00257112	0.00249818	0.00242825	0.00236118	0.00229682	0.00223503	0.00217568	0.00211865	0.00206383	0.00201111	0.00196037	0.00191154	0.00186452	0.00181922	0.00177556	0.00173346	0.00169287	0.0016537	0.00161589
	4.51243	0.00744479	0.00711504	0.00680531	0.00651409	0.00624003	0.00598187	0.00573848	0.00550882	0.00529191	0.0050869	0.00489296	0.00470936	0.00453541	0.00437048	0.00421399	0.0040654	0.00392421	0.00378996	0.00366223	0.00354062	0.00342476	0.00331432	0.00320897	0.00310842	0.00301239	0.00292063	0.00283291	0.00274899	0.00266867	0.00259176	0.00251807	0.00244743	0.00237968	0.00231468	0.00225228	0.00219234	0.00213476	0.0020794	0.00202617	0.00197495	0.00192565	0.00187818	0.00183245	0.00178838	0.00174589	0.00170492	0.00166539	0.00162724
	4.53813	0.00752261	0.00718868	0.00687504	0.00658018	0.00630272	0.00604139	0.00579503	0.00556259	0.00534308	0.00513562	0.00493939	0.00475364	0.00457766	0.00441083	0.00425254	0.00410226	0.00395947	0.00382372	0.00369457	0.00357161	0.00345448	0.00334283	0.00323634	0.00313471	0.00303766	0.00294493	0.00285629	0.00277149	0.00269034	0.00261263	0.00253819	0.00246683	0.0023984	0.00233274	0.00226972	0.00220919	0.00215104	0.00209514	0.00204139	0.00198968	0.0019399	0.00189198	0.00184582	0.00180133	0.00175845	0.0017171	0.0016772	0.0016387
	4.56386	0.00760156	0.00726337	0.00694576	0.00664721	0.0063663	0.00610174	0.00585236	0.00561709	0.00539494	0.005185	0.00498644	0.0047985	0.00462047	0.0044517	0.00429159	0.00413959	0.00399519	0.0038579	0.00372731	0.00360299	0.00348457	0.0033717	0.00326405	0.00316132	0.00306324	0.00296952	0.00287994	0.00279425	0.00271226	0.00263375	0.00255854	0.00248645	0.00241733	0.00235101	0.00228736	0.00222623	0.0021675	0.00211106	0.00205678	0.00200456	0.00195431	0.00190593	0.00185933	0.00181443	0.00177114	0.0017294	0.00168914	0.00165028
	4.58962	0.00768166	0.00733914	0.0070175	0.00671519	0.00643076	0.00616293	0.00591049	0.00567235	0.00544751	0.00523505	0.00503412	0.00484396	0.00466384	0.0044931	0.00433114	0.0041774	0.00403135	0.00389252	0.00376046	0.00363476	0.00351503	0.00340092	0.0032921	0.00318826	0.00308912	0.0029944	0.00290387	0.00281729	0.00273443	0.00265511	0.00257912	0.0025063	0.00243647	0.00236948	0.00230519	0.00224345	0.00218414	0.00212714	0.00207234	0.00201961	0.00196888	0.00192003	0.00187299	0.00182766	0.00178397	0.00174183	0.00170119	0.00166198
	4.6154	0.00776293	0.007416	0.00709027	0.00678413	0.00649614	0.00622497	0.00596942	0.00572836	0.00550079	0.00528577	0.00508244	0.00489002	0.00470778	0.00453505	0.00437121	0.0042157	0.00406798	0.00392758	0.00379403	0.00366692	0.00354586	0.0034305	0.00332049	0.00321552	0.00311531	0.00301958	0.00292809	0.00284059	0.00275687	0.00267672	0.00259994	0.00252637	0.00245583	0.00238817	0.00232322	0.00226087	0.00220097	0.00214341	0.00208806	0.00203483	0.0019836	0.00193428	0.00188679	0.00184103	0.00179692	0.0017544	0.00171338	0.0016738
	4.6412	0.00784539	0.00749398	0.00716408	0.00685405	0.00656244	0.00628789	0.00602916	0.00578515	0.0055548	0.00533718	0.00513141	0.0049367	0.00475231	0.00457755	0.00441181	0.0042545	0.00410509	0.00396308	0.00382803	0.00369949	0.00357709	0.00346044	0.00334923	0.00324312	0.00314182	0.00304507	0.00295259	0.00286417	0.00277956	0.00269858	0.00262101	0.00254668	0.00247542	0.00240706	0.00234146	0.00227848	0.00221799	0.00215985	0.00210396	0.00205021	0.00199848	0.00194869	0.00190074	0.00185454	0.00181002	0.00176709	0.00172569	0.00168574
	4.66703	0.00792905	0.0075731	0.00723895	0.00692498	0.00662968	0.00635169	0.00608975	0.00584272	0.00560956	0.00538929	0.00518105	0.00498401	0.00479742	0.00462061	0.00445293	0.0042938	0.00414267	0.00399904	0.00386245	0.00373247	0.0036087	0.00349076	0.00337832	0.00327105	0.00316866	0.00307086	0.00297739	0.00288803	0.00280253	0.00272069	0.00264232	0.00256722	0.00249522	0.00242617	0.00235991	0.00229629	0.00223519	0.00217648	0.00212004	0.00206575	0.00201352	0.00196325	0.00191484	0.0018682	0.00182325	0.00177992	0.00173813	0.00169781
	4.69288	0.00801395	0.00765337	0.00731492	0.00699693	0.00669788	0.00641639	0.00615118	0.00590109	0.00566506	0.00544212	0.00523135	0.00503195	0.00484314	0.00466424	0.0044946	0.00433361	0.00418073	0.00403546	0.00389732	0.00376587	0.00364071	0.00352146	0.00340777	0.00329933	0.00319582	0.00309696	0.00300249	0.00291217	0.00282577	0.00274307	0.00266387	0.002588	0.00251526	0.0024455	0.00237856	0.0023143	0.00225259	0.00219329	0.00213629	0.00208147	0.00202873	0.00197797	0.00192909	0.001882	0.00183663	0.00179288	0.0017507	0.00171
	4.71875	0.00810011	0.00773482	0.00739198	0.00706991	0.00676706	0.00648201	0.00621348	0.00596028	0.00572134	0.00549567	0.00528234	0.00508054	0.00488948	0.00470845	0.00453681	0.00437394	0.00421929	0.00407235	0.00393263	0.00379969	0.00367312	0.00355254	0.00343759	0.00332795	0.00322331	0.00312338	0.00302789	0.0029366	0.00284928	0.00276571	0.00268568	0.00260901	0.00253552	0.00246505	0.00239743	0.00233252	0.00227018	0.00221029	0.00215272	0.00209736	0.0020441	0.00199284	0.00194349	0.00189595	0.00185014	0.00180598	0.0017634	0.00172232
	4.74465	0.00818754	0.00781746	0.00747017	0.00714395	0.00683722	0.00654856	0.00627665	0.00602029	0.0057784	0.00554995	0.00533403	0.00512978	0.00493643	0.00475325	0.00457958	0.0044148	0.00425836	0.00410971	0.00396839	0.00383394	0.00370594	0.00358401	0.00346778	0.00335693	0.00325114	0.00315012	0.0030536	0.00296133	0.00287308	0.00278862	0.00270775	0.00263028	0.00255603	0.00248482	0.00241651	0.00235094	0.00228797	0.00222748	0.00216934	0.00211343	0.00205964	0.00200788	0.00195805	0.00191005	0.0018638	0.00181922	0.00177624	0.00173477
	4.77057	0.00827627	0.00790133	0.0075495	0.00721906	0.0069084	0.00661606	0.00634072	0.00608115	0.00583625	0.00560499	0.00538642	0.0051797	0.00498402	0.00479865	0.00462292	0.0044562	0.00429793	0.00414756	0.00400462	0.00386863	0.00373918	0.00361587	0.00349835	0.00338626	0.00327931	0.00317718	0.00307962	0.00298635	0.00289715	0.0028118	0.00273008	0.00265179	0.00257677	0.00250482	0.00243581	0.00236957	0.00230597	0.00224486	0.00218614	0.00212967	0.00207536	0.00202309	0.00197277	0.00192431	0.00187761	0.0018326	0.00178921	0.00174735
	4.79651	0.00836633	0.00798643	0.00763	0.00729526	0.0069806	0.00668453	0.00640569	0.00614286	0.00589491	0.00566078	0.00543954	0.00523029	0.00503225	0.00484466	0.00466683	0.00449815	0.00433802	0.00418591	0.00404131	0.00390376	0.00377284	0.00364814	0.0035293	0.00341596	0.00330782	0.00320458	0.00310595	0.00301168	0.00292152	0.00283525	0.00275266	0.00267356	0.00259775	0.00252506	0.00245533	0.00238841	0.00232416	0.00226244	0.00220313	0.0021461	0.00209124	0.00203846	0.00198765	0.00193871	0.00189157	0.00184613	0.00180232	0.00176006
	4.82248	0.00845774	0.0080728	0.00771168	0.00737258	0.00705385	0.00675398	0.00647159	0.00620545	0.00595439	0.00571735	0.00549338	0.00528158	0.00508113	0.00489128	0.00471134	0.00454065	0.00437864	0.00422475	0.00407847	0.00393934	0.00380692	0.00368081	0.00356063	0.00344604	0.0033367	0.00323231	0.00313261	0.00303731	0.00294618	0.00285899	0.00277552	0.00269558	0.00261897	0.00254553	0.00247508	0.00240747	0.00234256	0.00228022	0.0022203	0.00216271	0.00210731	0.002054	0.00200269	0.00195328	0.00190567	0.0018598	0.00181557	0.0017729
	4.84848	0.00855052	0.00816046	0.00779457	0.00745103	0.00712816	0.00682443	0.00653844	0.00626892	0.0060147	0.00577471	0.00554797	0.00533357	0.00513068	0.00493854	0.00475643	0.00458372	0.00441979	0.0042641	0.00411612	0.00397538	0.00384145	0.0037139	0.00359236	0.00347648	0.00336593	0.00326039	0.00315959	0.00306325	0.00297114	0.00288301	0.00279865	0.00271786	0.00264045	0.00256623	0.00249505	0.00242675	0.00236118	0.0022982	0.00223768	0.0021795	0.00212355	0.00206971	0.0020179	0.001968	0.00191993	0.00187361	0.00182896	0.00178589
	4.87449	0.0086447	0.00824943	0.00787869	0.00753063	0.00720355	0.00689589	0.00660624	0.00633329	0.00607587	0.00583288	0.00560332	0.00538628	0.00518091	0.00498643	0.00480214	0.00462736	0.00446149	0.00430396	0.00415426	0.00401189	0.00387642	0.00374741	0.0036245	0.00350731	0.00339552	0.00328881	0.0031869	0.00308951	0.0029964	0.00290732	0.00282206	0.00274041	0.00266218	0.00258718	0.00251526	0.00244625	0.00238	0.00231638	0.00225525	0.00219648	0.00213997	0.0020856	0.00203327	0.00198288	0.00193435	0.00188758	0.00184249	0.00179901
	4.90053	0.00874031	0.00833973	0.00796406	0.00761141	0.00728005	0.0069684	0.00667501	0.00639858	0.0061379	0.00589185	0.00565944	0.00543971	0.00523182	0.00503498	0.00484846	0.00467158	0.00450374	0.00434436	0.0041929	0.00404887	0.00391183	0.00378135	0.00365704	0.00353853	0.00342548	0.00331759	0.00321455	0.00311609	0.00302196	0.00293192	0.00284574	0.00276322	0.00268416	0.00260838	0.0025357	0.00246598	0.00239905	0.00233477	0.00227301	0.00221365	0.00215657	0.00210166	0.00204881	0.00199793	0.00194892	0.00190169	0.00185617	0.00181227
	4.9266	0.00883737	0.00843139	0.0080507	0.00769338	0.00735767	0.00704196	0.00674478	0.00646481	0.00620081	0.00595166	0.00571634	0.00549388	0.00528343	0.00508419	0.0048954	0.0047164	0.00454656	0.00438528	0.00423204	0.00408634	0.00394771	0.00381572	0.00368999	0.00357014	0.00345582	0.00334672	0.00324254	0.003143	0.00304784	0.00295682	0.00286971	0.0027863	0.0027064	0.00262982	0.00255638	0.00248593	0.00241831	0.00235337	0.00229098	0.00223102	0.00217336	0.0021179	0.00206453	0.00201314	0.00196365	0.00191596	0.00187	0.00182567
	4.95268	0.0089359	0.00852443	0.00813864	0.00777657	0.00743643	0.00711659	0.00681556	0.00653199	0.00626462	0.00601232	0.00577403	0.00554881	0.00533576	0.00513407	0.00494299	0.00476182	0.00458994	0.00442675	0.0042717	0.00412429	0.00398405	0.00385054	0.00372337	0.00360215	0.00348654	0.00337622	0.00327088	0.00317023	0.00307403	0.00298202	0.00289397	0.00280967	0.00272891	0.00265152	0.00257731	0.00250612	0.00243779	0.00237218	0.00230915	0.00224858	0.00219034	0.00213432	0.00208041	0.00202852	0.00197854	0.00193038	0.00188397	0.00183922
	4.97879	0.00903594	0.00861889	0.00822791	0.007861	0.00751636	0.00719232	0.00688737	0.00660013	0.00632934	0.00607383	0.00583254	0.0056045	0.00538881	0.00518463	0.00499122	0.00480786	0.00463391	0.00446877	0.00431188	0.00416274	0.00402086	0.00388581	0.00375717	0.00363457	0.00351765	0.00340608	0.00329957	0.00319781	0.00310054	0.00300752	0.00291852	0.00283331	0.00275169	0.00267347	0.00259848	0.00252654	0.0024575	0.00239121	0.00232754	0.00226634	0.00220751	0.00215093	0.00209648	0.00204407	0.00199359	0.00194497	0.0018981	0.00185292
	5.00493	0.00913752	0.00871478	0.00831851	0.00794669	0.00759746	0.00726915	0.00696022	0.00666926	0.00639498	0.00613621	0.00589188	0.00566097	0.00544259	0.00523589	0.00504011	0.00485452	0.00467847	0.00451135	0.00435259	0.00420169	0.00405815	0.00392153	0.0037914	0.0036674	0.00354915	0.00343633	0.00332861	0.00322572	0.00312738	0.00303334	0.00294337	0.00285723	0.00277474	0.00269568	0.00261989	0.0025472	0.00247744	0.00241046	0.00234613	0.00228431	0.00222488	0.00216772	0.00211273	0.00205979	0.00200881	0.00195971	0.00191238	0.00186676
	5.03109	0.00924066	0.00881213	0.00841049	0.00803366	0.00767978	0.00734712	0.00703414	0.00673939	0.00646157	0.00619949	0.00595205	0.00571823	0.00549712	0.00528786	0.00508967	0.00490181	0.00472362	0.00455449	0.00439385	0.00424116	0.00409593	0.00395771	0.00382608	0.00370065	0.00358105	0.00346695	0.00335802	0.00325398	0.00315455	0.00305948	0.00296852	0.00288145	0.00279806	0.00271816	0.00264157	0.0025681	0.00249761	0.00242993	0.00236493	0.00230248	0.00224244	0.0021847	0.00212915	0.00207569	0.0020242	0.00197461	0.00192682	0.00188075
	5.05727	0.00934539	0.00891098	0.00850386	0.00812195	0.00776332	0.00742625	0.00710914	0.00681054	0.00652912	0.00626367	0.00601308	0.0057763	0.00555242	0.00534055	0.00513991	0.00494975	0.0047694	0.00459822	0.00443565	0.00428114	0.0041342	0.00399437	0.00386121	0.00373433	0.00361336	0.00349796	0.0033878	0.0032826	0.00318206	0.00308593	0.00299397	0.00290595	0.00282167	0.00274091	0.00266349	0.00258925	0.00251801	0.00244963	0.00238396	0.00232086	0.0022602	0.00220188	0.00214576	0.00209176	0.00203976	0.00198968	0.00194141	0.00189489
	5.08348	0.00945174	0.00901134	0.00859866	0.00821156	0.00784812	0.00750655	0.00718524	0.00688273	0.00659765	0.00632878	0.00607497	0.00583519	0.00560849	0.00539397	0.00519084	0.00499834	0.00481579	0.00464254	0.00447802	0.00432166	0.00417298	0.0040315	0.00389679	0.00376844	0.00364608	0.00352936	0.00341796	0.00331157	0.00320991	0.00311271	0.00301974	0.00293076	0.00284556	0.00276393	0.00268568	0.00261065	0.00253866	0.00246956	0.0024032	0.00233945	0.00227817	0.00221925	0.00216256	0.00210801	0.00205549	0.00200491	0.00195617	0.00190919
	5.10971	0.00955975	0.00911325	0.0086949	0.00830254	0.00793418	0.00758804	0.00726247	0.00695598	0.00666718	0.00639482	0.00613775	0.00589492	0.00566534	0.00544814	0.00524248	0.0050476	0.00486281	0.00468746	0.00452095	0.00436272	0.00421227	0.00406912	0.00393283	0.00380299	0.00367922	0.00356116	0.00344849	0.0033409	0.0032381	0.00313982	0.00304583	0.00295587	0.00286973	0.00278722	0.00270814	0.0026323	0.00255955	0.00248972	0.00242267	0.00235825	0.00229634	0.00223681	0.00217955	0.00212445	0.0020714	0.00202031	0.00197109	0.00192365
	5.13596	0.00966944	0.00921673	0.00879262	0.00839489	0.00802155	0.00767076	0.00734085	0.0070303	0.00673771	0.00646181	0.00620143	0.00595549	0.005723	0.00550306	0.00529483	0.00509754	0.00491048	0.00473298	0.00456446	0.00440433	0.00425208	0.00410724	0.00396935	0.00383799	0.00371279	0.00359337	0.00347942	0.0033706	0.00326665	0.00316727	0.00307223	0.00298128	0.00289421	0.0028108	0.00273086	0.00265421	0.00258069	0.00251012	0.00244236	0.00237727	0.00231472	0.00225458	0.00219673	0.00214107	0.00208749	0.00203589	0.00198617	0.00193826
	5.16224	0.00978084	0.00932182	0.00889184	0.00848865	0.00811023	0.00775471	0.00742039	0.00710572	0.00680928	0.00652978	0.00626603	0.00601693	0.00578148	0.00555876	0.00534792	0.00514817	0.0049588	0.00477913	0.00460855	0.00444649	0.00429243	0.00414586	0.00400634	0.00387345	0.00374679	0.00362599	0.00351073	0.00340068	0.00329555	0.00319506	0.00309896	0.00300701	0.00291898	0.00283466	0.00275386	0.00267638	0.00260207	0.00253076	0.00246228	0.00239651	0.00233331	0.00227255	0.00221411	0.00215788	0.00210376	0.00205163	0.00200142	0.00195303
	5.18854	0.009894	0.00942854	0.00899259	0.00858385	0.00820026	0.00783992	0.00750111	0.00718225	0.0068819	0.00659874	0.00633156	0.00607925	0.00584079	0.00561524	0.00540174	0.0051995	0.00500778	0.0048259	0.00465325	0.00448922	0.0043333	0.00418499	0.00404382	0.00390936	0.00378122	0.00365903	0.00354245	0.00343114	0.00332482	0.0032232	0.00312603	0.00303305	0.00294405	0.00285881	0.00277713	0.00269882	0.00262371	0.00255164	0.00248244	0.00241598	0.00235212	0.00229073	0.00223169	0.00217488	0.00212021	0.00206756	0.00201684	0.00196797
	5.21487	0.0100089	0.00953693	0.0090949	0.00868051	0.00829166	0.00792643	0.00758305	0.00725992	0.00695559	0.0066687	0.00639804	0.00614246	0.00590094	0.00567252	0.00545632	0.00525155	0.00505744	0.00487332	0.00469855	0.00453253	0.00437473	0.00422464	0.00408179	0.00394575	0.00381611	0.0036925	0.00357457	0.00346199	0.00335445	0.00325169	0.00315343	0.00305942	0.00296943	0.00288325	0.00280068	0.00272153	0.00264561	0.00257276	0.00250284	0.00243567	0.00237114	0.00230911	0.00224946	0.00219208	0.00213684	0.00208366	0.00203243	0.00198307
	5.24121	0.0101257	0.00964703	0.0091988	0.00877866	0.00838446	0.00801424	0.00766621	0.00733875	0.00703036	0.00673969	0.00646548	0.00620658	0.00596195	0.00573061	0.00551167	0.00530432	0.00510779	0.00492139	0.00474446	0.00457642	0.00441671	0.00426482	0.00412027	0.00398261	0.00385145	0.0037264	0.0036071	0.00349323	0.00338447	0.00328054	0.00318117	0.00308611	0.00299512	0.002908	0.00282452	0.00274451	0.00266777	0.00259414	0.00252347	0.0024556	0.00239039	0.00232771	0.00226744	0.00220947	0.00215367	0.00209994	0.0020482	0.00199835
	5.26759	0.0102443	0.00975885	0.00930432	0.00887833	0.00847868	0.00810339	0.00775063	0.00741876	0.00710625	0.00681172	0.00653391	0.00627163	0.00602384	0.00578953	0.0055678	0.00535783	0.00515884	0.00497012	0.00479101	0.00462091	0.00445926	0.00430554	0.00415925	0.00401996	0.00388726	0.00376074	0.00364005	0.00352486	0.00341486	0.00330975	0.00320926	0.00311313	0.00302113	0.00293304	0.00284865	0.00276776	0.0026902	0.00261578	0.00254435	0.00247576	0.00240986	0.00234653	0.00228563	0.00222705	0.00217068	0.00211641	0.00206415	0.00201379
	5.29398	0.0103648	0.00987244	0.0094115	0.00897954	0.00857435	0.00819389	0.00783632	0.00749996	0.00718326	0.00688482	0.00660333	0.00633763	0.00608661	0.00584929	0.00562473	0.00541209	0.0052106	0.00501952	0.0048382	0.00466601	0.00450238	0.0043468	0.00419876	0.00405781	0.00392353	0.00379552	0.00367343	0.00355691	0.00344564	0.00333933	0.0032377	0.00314049	0.00304746	0.0029584	0.00287308	0.0027913	0.00271289	0.00263767	0.00256548	0.00249615	0.00242956	0.00236556	0.00230403	0.00224484	0.00218789	0.00213307	0.00208027	0.0020294
	5.32041	0.0104872	0.00998782	0.00952035	0.00908233	0.00867149	0.00828578	0.00792332	0.00758239	0.00726142	0.00695899	0.00667378	0.00640458	0.0061503	0.0059099	0.00568246	0.00546712	0.00526308	0.00506961	0.00488603	0.00471172	0.00454609	0.00438862	0.00423879	0.00409615	0.00396028	0.00383076	0.00370724	0.00358937	0.00347681	0.00336928	0.0032665	0.00316819	0.00307412	0.00298406	0.0028978	0.00281513	0.00273586	0.00265983	0.00258685	0.00251679	0.00244949	0.00238482	0.00232264	0.00226284	0.0022053	0.00214991	0.00209657	0.00204519
	5.34685	0.0106116	0.010105	0.00963092	0.00918672	0.00877014	0.00837908	0.00801164	0.00766606	0.00734076	0.00703427	0.00674527	0.00647252	0.0062149	0.00597139	0.00574102	0.00552293	0.0053163	0.0051204	0.00493453	0.00475806	0.0045904	0.004431	0.00427936	0.00413501	0.00399751	0.00386647	0.00374149	0.00362224	0.00350838	0.00339962	0.00329566	0.00319624	0.00310111	0.00301005	0.00292283	0.00283924	0.00275911	0.00268225	0.00260849	0.00253768	0.00246966	0.0024043	0.00234147	0.00228104	0.00222291	0.00216695	0.00211306	0.00206116
	5.37332	0.010738	0.0102241	0.00974324	0.00929275	0.00887032	0.00847382	0.00810131	0.007751	0.00742128	0.00711067	0.00681781	0.00654145	0.00628045	0.00603376	0.00580042	0.00557953	0.00537027	0.0051719	0.0049837	0.00480503	0.0046353	0.00447395	0.00432047	0.00417438	0.00403524	0.00390264	0.00377619	0.00365554	0.00354036	0.00343034	0.00332519	0.00322464	0.00312844	0.00303635	0.00294816	0.00286365	0.00278264	0.00270494	0.00263038	0.00255881	0.00249006	0.00242401	0.00236052	0.00229946	0.00224072	0.00218418	0.00212974	0.00207731
	5.39981	0.0108664	0.0103451	0.00985734	0.00940045	0.00897207	0.00857003	0.00819235	0.00783723	0.00750302	0.00718821	0.00689142	0.00661139	0.00634695	0.00609704	0.00586067	0.00563693	0.00542501	0.00522412	0.00503355	0.00485266	0.00468083	0.00451749	0.00436214	0.00421428	0.00407347	0.00393929	0.00381134	0.00368928	0.00357275	0.00346146	0.0033551	0.0032534	0.00315611	0.00306299	0.00297381	0.00288837	0.00280646	0.00272791	0.00265254	0.00258019	0.00251071	0.00244396	0.00237979	0.00231809	0.00225873	0.00220161	0.00214661	0.00209364
	5.42633	0.0109969	0.0104681	0.00997326	0.00950985	0.0090754	0.00866772	0.00828479	0.00792477	0.00758599	0.00726691	0.00696613	0.00668237	0.00641443	0.00616123	0.00592178	0.00569516	0.00548052	0.00527707	0.0050841	0.00490094	0.00472698	0.00456163	0.00440438	0.00425472	0.00411221	0.00397642	0.00384696	0.00372345	0.00360557	0.00349298	0.00338539	0.00328253	0.00318413	0.00308996	0.00299978	0.00291338	0.00283057	0.00275115	0.00267496	0.00260183	0.0025316	0.00246413	0.00239929	0.00233694	0.00227696	0.00221924	0.00216367	0.00211016
	5.45286	0.0111296	0.010593	0.010091	0.00962098	0.00918036	0.00876694	0.00837866	0.00801366	0.00767023	0.0073468	0.00704196	0.00675439	0.00648289	0.00622636	0.00598378	0.00575422	0.00553681	0.00533077	0.00513536	0.0049499	0.00477376	0.00460637	0.00444718	0.0042957	0.00415147	0.00401405	0.00388304	0.00375807	0.0036388	0.0035249	0.00341607	0.00331202	0.0032125	0.00311726	0.00302607	0.0029387	0.00285497	0.00277468	0.00269766	0.00262373	0.00255275	0.00248455	0.00241902	0.002356	0.00229539	0.00223707	0.00218093	0.00212686
	5.47943	0.0112644	0.0107199	0.0102107	0.00973387	0.00928698	0.00886771	0.00847399	0.00810391	0.00775574	0.0074279	0.00711893	0.00682749	0.00655237	0.00629244	0.00604668	0.00581413	0.00559392	0.00538523	0.00518734	0.00499953	0.00482119	0.00465172	0.00449057	0.00433724	0.00419125	0.00405218	0.0039196	0.00379315	0.00367247	0.00355724	0.00344714	0.0033419	0.00324124	0.00314491	0.00305268	0.00296434	0.00287968	0.0027985	0.00272063	0.0026459	0.00257414	0.00250521	0.00243898	0.00237529	0.00231405	0.00225511	0.00219838	0.00214376
	5.50602	0.0114014	0.0108489	0.0103323	0.00984857	0.00939527	0.00897006	0.00857079	0.00819555	0.00784257	0.00751023	0.00719705	0.00690168	0.00662287	0.0063595	0.00611049	0.0058749	0.00565184	0.00544047	0.00524005	0.00504987	0.00486928	0.0046977	0.00453456	0.00437934	0.00423157	0.00409081	0.00395665	0.00382869	0.00370658	0.00359	0.00347861	0.00337215	0.00327033	0.00317291	0.00307964	0.0029903	0.00290469	0.00282261	0.00274388	0.00266833	0.00259579	0.00252612	0.00245917	0.00239481	0.00233292	0.00227336	0.00221604	0.00216085
	5.53263	0.0115406	0.01098	0.0104558	0.0099651	0.00950529	0.00907401	0.00866911	0.00828861	0.00793072	0.0075938	0.00727634	0.00697697	0.00669442	0.00642753	0.00617524	0.00593656	0.00571059	0.00549649	0.0052935	0.0051009	0.00491804	0.00474431	0.00457914	0.00442201	0.00427244	0.00412997	0.00399419	0.0038647	0.00374114	0.00362318	0.00351049	0.00340279	0.0032998	0.00320126	0.00310693	0.00301658	0.00293001	0.00284702	0.00276742	0.00269104	0.00261771	0.00254728	0.00247961	0.00241456	0.00235201	0.00229183	0.0022339	0.00217813
	5.55926	0.0116821	0.0111133	0.0105813	0.0100835	0.00961706	0.00917961	0.00876896	0.00838312	0.00802024	0.00767866	0.00735684	0.0070534	0.00676704	0.00649658	0.00624094	0.00599911	0.00577019	0.00555332	0.00534772	0.00515266	0.00496749	0.00479157	0.00462434	0.00446527	0.00431386	0.00416966	0.00403223	0.00390119	0.00377616	0.0036568	0.00354279	0.00343383	0.00332964	0.00322997	0.00313456	0.00304319	0.00295565	0.00287173	0.00279124	0.00271402	0.00263989	0.00256869	0.00250029	0.00243455	0.00237133	0.00231051	0.00225197	0.00219562
	5.58592	0.011826	0.0112487	0.0107089	0.0102038	0.00973061	0.00928688	0.00887039	0.00847909	0.00811113	0.00776481	0.00743857	0.00713098	0.00684074	0.00656664	0.0063076	0.00606258	0.00583065	0.00561096	0.0054027	0.00520515	0.00501762	0.00483949	0.00467017	0.00450912	0.00435584	0.00420987	0.00407078	0.00393816	0.00381163	0.00369085	0.0035755	0.00346527	0.00335987	0.00325905	0.00316255	0.00307014	0.0029816	0.00289674	0.00281536	0.00273728	0.00266234	0.00259037	0.00252122	0.00245477	0.00239087	0.0023294	0.00227026	0.00221331
	5.6126	0.0119723	0.0113863	0.0108386	0.0103261	0.00984598	0.00939585	0.00897341	0.00857657	0.00820343	0.00785229	0.00752153	0.00720973	0.00691554	0.00663775	0.00637524	0.00612697	0.00589199	0.00566943	0.00545848	0.00525839	0.00506846	0.00488808	0.00471663	0.00455357	0.0043984	0.00425064	0.00410985	0.00397562	0.00384758	0.00372536	0.00360864	0.00349712	0.00339049	0.0032885	0.00319089	0.00309742	0.00300789	0.00292207	0.00283978	0.00276083	0.00268506	0.0026123	0.0025424	0.00247523	0.00241065	0.00234853	0.00228875	0.00223121
	5.63931	0.012121	0.0115263	0.0109704	0.0104503	0.00996321	0.00950657	0.00907806	0.00867557	0.00829717	0.00794111	0.00760577	0.00728967	0.00699147	0.00670992	0.00644389	0.00619231	0.00595423	0.00572875	0.00551505	0.00531238	0.00512002	0.00493734	0.00476374	0.00459864	0.00444154	0.00429196	0.00414945	0.00401359	0.003884	0.00376032	0.00364222	0.00352938	0.0034215	0.00331832	0.00321959	0.00312505	0.0030345	0.00294771	0.00286449	0.00278467	0.00270806	0.0026345	0.00256384	0.00249594	0.00243066	0.00236787	0.00230746	0.00224931
	5.66604	0.0122722	0.0116685	0.0111043	0.0105766	0.0100823	0.00961905	0.00918437	0.00877613	0.00839238	0.00803131	0.0076913	0.00737084	0.00706855	0.00678318	0.00651355	0.00625861	0.00601737	0.00578892	0.00557244	0.00536714	0.00517231	0.00498731	0.0048115	0.00464433	0.00448527	0.00433384	0.00418958	0.00405207	0.00392091	0.00379575	0.00367624	0.00356206	0.00345292	0.00334854	0.00324866	0.00315303	0.00306144	0.00297367	0.00288952	0.0028088	0.00273134	0.00265697	0.00258554	0.0025169	0.00245091	0.00238745	0.0023264	0.00226763
	5.69279	0.012426	0.0118131	0.0112405	0.0107049	0.0102034	0.00973335	0.00929237	0.00887828	0.00848907	0.00812291	0.00777815	0.00745324	0.0071468	0.00685753	0.00658425	0.00632589	0.00608144	0.00584998	0.00563065	0.00542269	0.00522535	0.00503797	0.00485993	0.00469066	0.00452961	0.0043763	0.00423026	0.00409106	0.00395832	0.00383164	0.0037107	0.00359517	0.00348474	0.00337914	0.0032781	0.00318137	0.00308873	0.00299996	0.00291486	0.00283323	0.00275491	0.00267972	0.0026075	0.00253811	0.00247141	0.00240726	0.00234555	0.00228616
	5.71957	0.0125823	0.0119601	0.0113789	0.0108353	0.0103264	0.00984948	0.00940211	0.00898205	0.00858728	0.00821594	0.00786633	0.00753691	0.00722623	0.006933	0.00665602	0.00639417	0.00614645	0.00591192	0.00568971	0.00547903	0.00527914	0.00508935	0.00490905	0.00473763	0.00457456	0.00441934	0.00427149	0.00413059	0.00399622	0.00386802	0.00374563	0.00362871	0.00351698	0.00341014	0.00330792	0.00321007	0.00311636	0.00302658	0.00294051	0.00285797	0.00277877	0.00270274	0.00262972	0.00255957	0.00249215	0.00242731	0.00236494	0.00230491
	5.74637	0.0127412	0.0121096	0.0115196	0.0109679	0.0104514	0.0099675	0.0095136	0.00908747	0.00868704	0.00831042	0.00795589	0.00762186	0.00730688	0.00700962	0.00672886	0.00646347	0.00621243	0.00597477	0.00574963	0.00553619	0.0053337	0.00514147	0.00495885	0.00478526	0.00462013	0.00446297	0.00431329	0.00417065	0.00403464	0.00390488	0.00378101	0.0036627	0.00354964	0.00344154	0.00333812	0.00323914	0.00314435	0.00305354	0.00296649	0.00288301	0.00280292	0.00272605	0.00265222	0.0025813	0.00251314	0.0024476	0.00238455	0.00232388
	5.77319	0.0129029	0.0122616	0.0116627	0.0111027	0.0105785	0.0100874	0.00962688	0.00919457	0.00878838	0.00840639	0.00804684	0.00770812	0.00738876	0.0070874	0.00680279	0.0065338	0.00627938	0.00603855	0.00581043	0.00559418	0.00538904	0.00519432	0.00500936	0.00483355	0.00466634	0.0045072	0.00435566	0.00421126	0.00407358	0.00394224	0.00381687	0.00369714	0.00358273	0.00347335	0.00336872	0.00326858	0.00317269	0.00308084	0.00299279	0.00290837	0.00282738	0.00274964	0.002675	0.00260329	0.00253438	0.00246813	0.0024044	0.00234308
	5.80004	0.0130673	0.0124162	0.0118081	0.0112397	0.0107077	0.0102093	0.009742	0.00930339	0.00889133	0.00850387	0.00813921	0.00779572	0.0074719	0.00716636	0.00687785	0.00660519	0.00634733	0.00610327	0.00587211	0.00565301	0.00544519	0.00524794	0.00506059	0.00488253	0.0047132	0.00455205	0.00439861	0.00425242	0.00411304	0.0039801	0.00385321	0.00373204	0.00361626	0.00350558	0.00339971	0.0032984	0.0032014	0.00310848	0.00301943	0.00293405	0.00285214	0.00277353	0.00269805	0.00262555	0.00255588	0.00248891	0.00242449	0.0023625
	5.82692	0.0132345	0.0125734	0.011956	0.0113789	0.010839	0.0103332	0.00985898	0.00941395	0.00899592	0.00860289	0.00823303	0.00788469	0.00755632	0.00724653	0.00695404	0.00667765	0.00641629	0.00616895	0.0059347	0.00571269	0.00550214	0.00530232	0.00511255	0.0049322	0.00476071	0.00459753	0.00444216	0.00429414	0.00415305	0.00401847	0.00389003	0.0037674	0.00365023	0.00353823	0.00343111	0.00332861	0.00323048	0.00313648	0.00304641	0.00296005	0.00287721	0.00279771	0.00272139	0.00264809	0.00257765	0.00250994	0.00244481	0.00238216
	5.85381	0.0134046	0.0127332	0.0121064	0.0115206	0.0109724	0.0104591	0.00997787	0.0095263	0.00910218	0.00870348	0.00832833	0.00797504	0.00764205	0.00732793	0.00703139	0.00675121	0.00648629	0.0062356	0.00599821	0.00577325	0.00555992	0.00535748	0.00516525	0.00498258	0.00480889	0.00464364	0.00448631	0.00433645	0.0041936	0.00405736	0.00392736	0.00380323	0.00368465	0.00357131	0.00346292	0.00335921	0.00325993	0.00316484	0.00307372	0.00298637	0.00290259	0.0028222	0.00274502	0.0026709	0.00259968	0.00253122	0.00246539	0.00240206
	5.88073	0.0135776	0.0128958	0.0122593	0.0116645	0.0111081	0.0105871	0.0100987	0.00964047	0.00921015	0.00880567	0.00842513	0.0080668	0.00772911	0.00741059	0.00710992	0.00682588	0.00655733	0.00630325	0.00606266	0.0058347	0.00561855	0.00541345	0.0052187	0.00503367	0.00485775	0.00469039	0.00453108	0.00437933	0.0042347	0.00409678	0.00396518	0.00383954	0.00371953	0.00360483	0.00349514	0.00339021	0.00328976	0.00319356	0.00310139	0.00301303	0.0029283	0.00284699	0.00276894	0.00269399	0.00262198	0.00255277	0.00248621	0.00242219
	5.90768	0.0137536	0.0130612	0.0124148	0.0118109	0.0112461	0.0107172	0.0102215	0.0097565	0.00931986	0.00890949	0.00852346	0.00816001	0.00781752	0.00749452	0.00718966	0.00690169	0.00662945	0.00637191	0.00612807	0.00589706	0.00567803	0.00547022	0.00527293	0.00508549	0.00490731	0.00473781	0.00457647	0.00442281	0.00427638	0.00413674	0.00400352	0.00387635	0.00375487	0.00363879	0.00352779	0.00342161	0.00331998	0.00322266	0.00312941	0.00304004	0.00295433	0.00287209	0.00279316	0.00271737	0.00264456	0.00257457	0.00250729	0.00244256
	5.93464	0.0139327	0.0132294	0.012573	0.0119598	0.0113863	0.0108494	0.0103463	0.00987441	0.00943134	0.00901498	0.00862336	0.00825468	0.00790732	0.00757976	0.00727063	0.00697865	0.00670267	0.0064416	0.00619446	0.00596033	0.00573838	0.00552782	0.00532794	0.00513806	0.00495757	0.00478589	0.0046225	0.0044669	0.00431862	0.00417725	0.00404238	0.00391365	0.00379069	0.00367321	0.00356088	0.00345343	0.00335059	0.00325213	0.00315779	0.00306738	0.00298069	0.00289751	0.00281769	0.00274104	0.00266741	0.00259665	0.00252862	0.00246319
	5.96163	0.0141149	0.0134005	0.0127339	0.0121112	0.0115289	0.0109839	0.0104732	0.00999426	0.00954464	0.00912216	0.00872485	0.00835086	0.00799853	0.00766632	0.00735284	0.00705679	0.00677699	0.00651234	0.00626183	0.00602455	0.00579962	0.00558626	0.00538374	0.00519138	0.00500854	0.00483466	0.00466918	0.0045116	0.00436146	0.00421832	0.00408177	0.00395145	0.003827	0.00370808	0.0035944	0.00348566	0.00338161	0.00328198	0.00318654	0.00309508	0.00300738	0.00292326	0.00284252	0.002765	0.00269055	0.002619	0.00255021	0.00248406
	5.98865	0.0143002	0.0135745	0.0128975	0.0122652	0.0116739	0.0111206	0.0106022	0.0101161	0.00965977	0.00923108	0.00882796	0.00844856	0.00809117	0.00775424	0.00743633	0.00713614	0.00685245	0.00658415	0.00633022	0.00608972	0.00586177	0.00564556	0.00544036	0.00524547	0.00506025	0.00488412	0.00471651	0.00455693	0.00440489	0.00425995	0.00412171	0.00398977	0.00386379	0.00374343	0.00362837	0.00351833	0.00341303	0.00331222	0.00321566	0.00312313	0.00303442	0.00294932	0.00286766	0.00278927	0.00271397	0.00264162	0.00257207	0.00250519
	6.01569	0.0144888	0.0137516	0.013064	0.0124218	0.0118214	0.0112596	0.0107333	0.0102399	0.00977679	0.00934176	0.00893273	0.00854782	0.00818528	0.00784353	0.00752112	0.0072167	0.00692906	0.00665705	0.00639964	0.00615586	0.00592484	0.00570573	0.0054978	0.00530034	0.0051127	0.00493428	0.00476452	0.00460289	0.00444892	0.00430216	0.00416219	0.00402861	0.00390108	0.00377924	0.00366279	0.00355142	0.00344487	0.00334286	0.00324516	0.00315155	0.0030618	0.00297572	0.00289313	0.00281384	0.00273769	0.00266452	0.0025942	0.00252657
	6.04275	0.0146807	0.0139318	0.0132333	0.012581	0.0119714	0.0114009	0.0108666	0.0103658	0.00989573	0.00945424	0.00903919	0.00864866	0.00828088	0.00793423	0.00760723	0.00729852	0.00700685	0.00673106	0.00647011	0.006223	0.00598884	0.00576679	0.00555609	0.00535602	0.00516591	0.00498516	0.0048132	0.0046495	0.00449357	0.00434495	0.00420323	0.00406799	0.00393888	0.00381555	0.00369767	0.00358496	0.00347712	0.0033739	0.00327504	0.00318033	0.00308953	0.00300246	0.00291891	0.00283872	0.0027617	0.00268771	0.0026166	0.00254822
	6.06984	0.014876	0.0141151	0.0134055	0.012743	0.0121239	0.0115446	0.0110022	0.0104937	0.0100166	0.00956856	0.00914738	0.00875113	0.008378	0.00802636	0.00769469	0.0073816	0.00708584	0.00680621	0.00654164	0.00629115	0.0060538	0.00582876	0.00561523	0.0054125	0.00521989	0.00503678	0.00486258	0.00469677	0.00453885	0.00438835	0.00424483	0.00410791	0.00397719	0.00385234	0.00373303	0.00361894	0.00350981	0.00340535	0.00330532	0.00320948	0.00311763	0.00302954	0.00294503	0.00286391	0.00278602	0.00271119	0.00263928	0.00257013
	6.09695	0.0150748	0.0143017	0.0135808	0.0129078	0.012279	0.0116908	0.01114	0.0106238	0.0101395	0.00968475	0.00925732	0.00885524	0.00847668	0.00811995	0.00778352	0.00746599	0.00716604	0.0068825	0.00661427	0.00636032	0.00611974	0.00589165	0.00567525	0.00546981	0.00527465	0.00508913	0.00491267	0.00474472	0.00458477	0.00443235	0.00428702	0.00414837	0.00401603	0.00388964	0.00376886	0.00365338	0.00354293	0.00343721	0.00333599	0.00323902	0.00314608	0.00305697	0.00297147	0.00288942	0.00281064	0.00273496	0.00266224	0.00259232
	6.12408	0.015277	0.0144915	0.0137591	0.0130755	0.0124368	0.0118394	0.0112802	0.0107561	0.0102644	0.00980284	0.00936906	0.00896104	0.00857693	0.00821503	0.00787376	0.00755169	0.0072475	0.00695998	0.006688	0.00643055	0.00618666	0.00595547	0.00573615	0.00552797	0.00533021	0.00514225	0.00496348	0.00479334	0.00463133	0.00447696	0.00432979	0.0041894	0.0040554	0.00392744	0.00380517	0.00368829	0.00357649	0.0034695	0.00336707	0.00326894	0.00317491	0.00308475	0.00299826	0.00291526	0.00283557	0.00275903	0.00268548	0.00261478
	6.15124	0.0154829	0.0146847	0.0139405	0.0132461	0.0125973	0.0119906	0.0114227	0.0108906	0.0103914	0.00992289	0.00948262	0.00906856	0.0086788	0.00831162	0.00796542	0.00763873	0.00733022	0.00703864	0.00676287	0.00650184	0.0062546	0.00602025	0.00579796	0.00558698	0.00538659	0.00519614	0.00501502	0.00484267	0.00467856	0.00452221	0.00437316	0.004231	0.00409532	0.00396576	0.00384198	0.00372366	0.0036105	0.00350222	0.00339855	0.00329926	0.00320411	0.00311289	0.00302539	0.00294143	0.00286082	0.00278341	0.00270902	0.00263752
	6.17842	0.0156925	0.0148813	0.0141252	0.0134196	0.0127606	0.0121444	0.0115677	0.0110273	0.0105206	0.0100449	0.00959805	0.00917782	0.00878232	0.00840976	0.00805854	0.00772715	0.00741424	0.00711853	0.00683888	0.00657422	0.00632357	0.006086	0.00586069	0.00564686	0.00544379	0.00525081	0.0050673	0.0048927	0.00472646	0.0045681	0.00441714	0.00427317	0.00413579	0.00400461	0.00387929	0.00375951	0.00364497	0.00353537	0.00343046	0.00332997	0.00323369	0.00314139	0.00305287	0.00296793	0.00288639	0.00280809	0.00273285	0.00266054
	6.20562	0.0159059	0.0150814	0.014313	0.0135962	0.0129267	0.0123008	0.0117151	0.0111664	0.0106519	0.010169	0.00971538	0.00928887	0.00888751	0.00850948	0.00815314	0.00781697	0.00749957	0.00719967	0.00691608	0.00664771	0.00639358	0.00615275	0.00592436	0.00570764	0.00550183	0.00530628	0.00512035	0.00494345	0.00477505	0.00461464	0.00446175	0.00431594	0.00417682	0.00404399	0.00391712	0.00379586	0.0036799	0.00356897	0.00346278	0.0033611	0.00326367	0.00317027	0.00308071	0.00299478	0.00291229	0.00283308	0.00275699	0.00268385
	6.23285	0.0161231	0.0152851	0.0145043	0.0137759	0.0130957	0.0124599	0.011865	0.0113078	0.0107854	0.0102951	0.00983465	0.00940175	0.00899442	0.00861081	0.00824926	0.00790821	0.00758625	0.00728206	0.00699446	0.00672233	0.00646466	0.0062205	0.00598899	0.00576932	0.00556074	0.00536257	0.00517416	0.00499494	0.00482433	0.00466184	0.00450698	0.00435931	0.00421842	0.00408392	0.00395546	0.00383269	0.00371531	0.00360302	0.00349554	0.00339263	0.00329403	0.00319953	0.00310891	0.00302197	0.00293852	0.0028584	0.00278143	0.00270746
	6.2601	0.0163442	0.0154924	0.0146989	0.0139587	0.0132677	0.0126218	0.0120175	0.0114516	0.0109211	0.0104234	0.0099559	0.00951648	0.00910307	0.00871379	0.00834692	0.00800091	0.0076743	0.00736576	0.00707407	0.00679811	0.00653683	0.00628929	0.00605459	0.00583192	0.00562052	0.00541968	0.00522877	0.00504717	0.00487432	0.00470971	0.00455285	0.00440329	0.0042606	0.0041244	0.00399433	0.00387003	0.0037512	0.00363753	0.00352874	0.00342458	0.0033248	0.00322917	0.00313747	0.00304951	0.00296509	0.00288403	0.00280618	0.00273136
	6.28738	0.0165694	0.0157035	0.014897	0.0141448	0.0134427	0.0127865	0.0121727	0.0115979	0.0110592	0.0105538	0.0100792	0.00963311	0.0092135	0.00881843	0.00844616	0.00809509	0.00776374	0.00745076	0.00715492	0.00687505	0.00661011	0.00635912	0.00612118	0.00589546	0.00568118	0.00547764	0.00528417	0.00510016	0.00492504	0.00475827	0.00459938	0.00444789	0.00430338	0.00416545	0.00403374	0.00390789	0.00378758	0.00367251	0.00356239	0.00345696	0.00335598	0.0032592	0.00316641	0.00307741	0.002992	0.00291	0.00283124	0.00275557
	6.31468	0.0167987	0.0159184	0.0150986	0.0143342	0.0136207	0.0129541	0.0123305	0.0117467	0.0111996	0.0106864	0.0102045	0.00975167	0.00932574	0.00892478	0.008547	0.00819078	0.00785461	0.00753711	0.00723703	0.00695319	0.00668452	0.00643002	0.00618878	0.00595996	0.00574276	0.00553646	0.00534039	0.00515393	0.00497649	0.00480754	0.00464657	0.00449312	0.00434676	0.00420707	0.00407369	0.00394626	0.00382445	0.00370796	0.00359649	0.00348978	0.00338757	0.00328963	0.00319573	0.00310567	0.00301926	0.0029363	0.00285663	0.00278008
	6.342	0.0170321	0.0161372	0.0153039	0.014527	0.0138019	0.0131246	0.0124911	0.0118981	0.0113424	0.0108212	0.0103319	0.00987221	0.00943984	0.00903287	0.00864948	0.00828801	0.00794693	0.00762483	0.00732044	0.00703255	0.00676008	0.00650201	0.00625742	0.00602543	0.00580526	0.00559616	0.00539745	0.00520849	0.00502869	0.00485751	0.00469444	0.004539	0.00439075	0.00424928	0.0041142	0.00398517	0.00386184	0.0037439	0.00363105	0.00352303	0.00341958	0.00332046	0.00322544	0.00313431	0.00304687	0.00296294	0.00288234	0.0028049
	6.36935	0.0172699	0.01636	0.0155129	0.0147232	0.0139864	0.0132981	0.0126545	0.012052	0.0114876	0.0109584	0.0104615	0.00999476	0.00955583	0.00914274	0.00875363	0.00838681	0.00804073	0.00771395	0.00740516	0.00711315	0.00683681	0.00657511	0.0063271	0.0060919	0.0058687	0.00565675	0.00545534	0.00526385	0.00508165	0.00490821	0.004743	0.00458553	0.00443536	0.00429208	0.00415528	0.00402462	0.00389974	0.00378032	0.00366608	0.00355674	0.00345203	0.0033517	0.00325554	0.00316332	0.00307485	0.00298993	0.00290838	0.00283005
	6.39672	0.017512	0.0165869	0.0157256	0.014923	0.0141741	0.0134746	0.0128207	0.0122087	0.0116354	0.0110978	0.0105933	0.0101194	0.00967375	0.00925442	0.00885949	0.00848722	0.00813604	0.00780448	0.00749122	0.00719502	0.00691474	0.00664934	0.00639785	0.00615938	0.0059331	0.00571824	0.0055141	0.00532002	0.00513539	0.00495965	0.00479226	0.00463273	0.00448061	0.00433548	0.00419694	0.00406461	0.00393816	0.00381725	0.00370159	0.0035909	0.0034849	0.00338336	0.00328604	0.00319271	0.00310319	0.00301726	0.00293476	0.00285551
	6.42412	0.0177586	0.0168179	0.0159423	0.0151263	0.0143651	0.0136543	0.0129898	0.0123681	0.0117857	0.0112397	0.0107273	0.0102461	0.00979364	0.00936795	0.00896708	0.00858926	0.00823289	0.00789647	0.00757865	0.00727818	0.00699389	0.00672473	0.0064697	0.00622789	0.00599847	0.00578066	0.00557374	0.00537703	0.00518992	0.00501183	0.00484223	0.00468061	0.00452651	0.0043795	0.00423918	0.00410517	0.00397711	0.00385469	0.00373759	0.00362553	0.00351823	0.00341545	0.00331694	0.0032225	0.0031319	0.00304496	0.00296148	0.00288131
	6.45153	0.0180099	0.0170532	0.0161629	0.0153333	0.0145596	0.0138372	0.013162	0.0125302	0.0119386	0.011384	0.0108636	0.0103749	0.00991554	0.00948337	0.00907644	0.00869297	0.0083313	0.00798994	0.00766748	0.00736266	0.00707428	0.00680128	0.00654265	0.00629745	0.00606485	0.00584403	0.00563427	0.00543489	0.00524526	0.00506479	0.00489293	0.00472918	0.00457307	0.00442415	0.00428202	0.00414629	0.00401661	0.00389265	0.00377408	0.00366062	0.003552	0.00344796	0.00334826	0.00325267	0.00316099	0.00307301	0.00298855	0.00290743
	6.47898	0.0182658	0.0172928	0.0163875	0.0155441	0.0147576	0.0140233	0.0133371	0.0126952	0.0120942	0.0115308	0.0110022	0.0105059	0.0100395	0.00960071	0.00918762	0.00879838	0.00843133	0.00808491	0.00775773	0.00744847	0.00715594	0.00687904	0.00661673	0.00636809	0.00613223	0.00590836	0.00569571	0.00549362	0.00530142	0.00511852	0.00494437	0.00477846	0.00462029	0.00446944	0.00432547	0.004188	0.00405667	0.00393113	0.00381107	0.0036962	0.00358624	0.00348092	0.00338	0.00328325	0.00319047	0.00310144	0.00301597	0.0029339
	6.50644	0.0185264	0.0175369	0.0166163	0.0157588	0.0149592	0.0142128	0.0135154	0.0128631	0.0122524	0.0116801	0.0111432	0.0106392	0.0101655	0.00972001	0.00930064	0.00890553	0.00853298	0.00818143	0.00784943	0.00753566	0.0072389	0.00695801	0.00669197	0.00643981	0.00620065	0.00597366	0.00575808	0.00555322	0.00535841	0.00517305	0.00499657	0.00482845	0.0046682	0.00451537	0.00436953	0.00423029	0.00409728	0.00397015	0.00384858	0.00373227	0.00362094	0.00351432	0.00341216	0.00331424	0.00322033	0.00313024	0.00304375	0.00296071
	6.53393	0.018792	0.0177856	0.0168493	0.0159773	0.0151644	0.0144057	0.0136969	0.013034	0.0124135	0.011832	0.0112867	0.0107747	0.0102937	0.00984132	0.00941554	0.00901444	0.0086363	0.00827951	0.00794261	0.00762424	0.00732316	0.00703823	0.00676839	0.00651265	0.00627012	0.00603996	0.0058214	0.00561372	0.00541625	0.00522838	0.00504953	0.00487917	0.0047168	0.00456197	0.00441423	0.00427319	0.00413846	0.00400971	0.00388661	0.00376884	0.00365612	0.00354818	0.00344477	0.00334565	0.0032506	0.00315942	0.0030719	0.00298787
	6.56144	0.0190627	0.0180388	0.0170866	0.0161999	0.0153734	0.0146021	0.0138816	0.0132079	0.0125774	0.0119866	0.0114326	0.0109126	0.010424	0.00996468	0.00953236	0.00912517	0.00874132	0.0083792	0.0080373	0.00771425	0.00740878	0.00711972	0.006846	0.00658662	0.00634067	0.00610728	0.00588568	0.00567513	0.00547496	0.00528454	0.00510328	0.00493064	0.00476611	0.00460924	0.00445956	0.00431669	0.00418023	0.00404984	0.00392516	0.00380591	0.00369178	0.00358249	0.00347781	0.00337747	0.00328127	0.00318899	0.00310042	0.00301539
	6.58898	0.0193384	0.0182969	0.0173283	0.0164266	0.0155862	0.014802	0.0140697	0.0133849	0.0127442	0.0121439	0.011581	0.0110528	0.0105566	0.0100901	0.00965115	0.00923774	0.00884808	0.00848052	0.00813352	0.0078057	0.00749576	0.0072025	0.00692484	0.00666175	0.0064123	0.00617564	0.00595094	0.00573748	0.00553455	0.00534153	0.00515782	0.00498286	0.00481614	0.00465719	0.00450555	0.00436082	0.00422259	0.00409052	0.00396426	0.0038435	0.00372793	0.00361728	0.0035113	0.00340973	0.00331235	0.00321895	0.00312932	0.00304326
	6.61654	0.0196194	0.0185598	0.0175746	0.0166575	0.0158028	0.0150056	0.0142611	0.0135651	0.0129139	0.0123039	0.0117321	0.0111955	0.0106915	0.0102177	0.00977194	0.00935219	0.0089566	0.0085835	0.00823132	0.00789864	0.00758413	0.0072866	0.00700492	0.00673805	0.00648506	0.00624505	0.0060172	0.00580077	0.00559504	0.00539938	0.00521317	0.00503585	0.00486691	0.00470584	0.00455221	0.00440558	0.00426556	0.00413178	0.00400391	0.00388161	0.00376458	0.00365255	0.00354525	0.00344243	0.00334385	0.00324931	0.0031586	0.00307151
	6.64412	0.0199057	0.0188277	0.0178254	0.0168926	0.0160235	0.0152129	0.014456	0.0137485	0.0130866	0.0124668	0.0118858	0.0113406	0.0108286	0.0103474	0.00989477	0.00946856	0.00906694	0.00868818	0.00833072	0.00799308	0.00767394	0.00737204	0.00708627	0.00681556	0.00655895	0.00631553	0.00608448	0.00586503	0.00565645	0.0054581	0.00526935	0.00508963	0.00491842	0.0047552	0.00459953	0.00445098	0.00430914	0.00417363	0.00404411	0.00392025	0.00380174	0.0036883	0.00357966	0.00347557	0.00337578	0.00328008	0.00318827	0.00310013
	6.67173	0.0201976	0.0191006	0.018081	0.0171322	0.0162483	0.015424	0.0146544	0.0139352	0.0132625	0.0126325	0.0120421	0.0114883	0.0109682	0.0104794	0.0100197	0.00958688	0.00917911	0.0087946	0.00843175	0.00808907	0.00776519	0.00745886	0.00716892	0.00689429	0.006634	0.00638711	0.0061528	0.00593027	0.0057188	0.00551771	0.00532637	0.00514421	0.00497069	0.00480529	0.00464755	0.00449704	0.00435334	0.00421607	0.00408488	0.00395944	0.00383943	0.00372455	0.00361455	0.00350916	0.00340814	0.00331127	0.00321833	0.00312913
	6.69936	0.020495	0.0193788	0.0183414	0.0173762	0.0164772	0.0156389	0.0148565	0.0141253	0.0134415	0.0128012	0.0122013	0.0116385	0.0111101	0.0106137	0.0101467	0.00970721	0.00929317	0.00890279	0.00853445	0.00818662	0.00785792	0.00754707	0.00725289	0.00697427	0.00671023	0.00645981	0.00622218	0.00599652	0.00578209	0.00557821	0.00538425	0.00519961	0.00502373	0.00485611	0.00469627	0.00454377	0.00439818	0.00425912	0.00412623	0.00399918	0.00387763	0.00376131	0.00364992	0.00354321	0.00344094	0.00334288	0.00324881	0.00315852
	6.72701	0.0207982	0.0196623	0.0186068	0.0176249	0.0167104	0.0158579	0.0150622	0.0143189	0.0136237	0.0129729	0.0123632	0.0117914	0.0112546	0.0107502	0.0102759	0.00982958	0.00940914	0.00901279	0.00863885	0.00828578	0.00795217	0.00763671	0.0073382	0.00705552	0.00678766	0.00653365	0.00629263	0.00606379	0.00584635	0.00563964	0.005443	0.00525583	0.00507757	0.00490769	0.00474571	0.00459117	0.00444367	0.00430279	0.00416817	0.00403948	0.00391638	0.00379857	0.00368578	0.00357774	0.00347419	0.00337492	0.00327969	0.00318831
	6.75469	0.0211073	0.0199512	0.0188772	0.0178782	0.016948	0.0160809	0.0152717	0.0145159	0.0138092	0.0131477	0.012528	0.0119469	0.0114015	0.0108891	0.0104074	0.00995404	0.00952707	0.00912462	0.00874498	0.00838657	0.00804796	0.00772781	0.00742489	0.00713808	0.00686632	0.00660866	0.00636419	0.0061321	0.00591161	0.00570201	0.00550265	0.0053129	0.0051322	0.00496002	0.00479587	0.00463927	0.00448981	0.00434709	0.00421072	0.00408035	0.00395567	0.00383636	0.00372214	0.00361274	0.0035079	0.00340739	0.00331099	0.00321849
	6.78239	0.0214224	0.0202457	0.0191528	0.0181363	0.01719	0.016308	0.0154851	0.0147166	0.0139981	0.0133256	0.0126958	0.0121052	0.011551	0.0110305	0.0105411	0.0100806	0.00964701	0.00923834	0.00885289	0.00848904	0.00814532	0.00782039	0.00751298	0.00722195	0.00694623	0.00668484	0.00643687	0.00620147	0.00597787	0.00576533	0.00556319	0.00537083	0.00518766	0.00501314	0.00484677	0.00468808	0.00453663	0.00439202	0.00425387	0.00412181	0.00399552	0.00387468	0.00375901	0.00364822	0.00354207	0.00344031	0.00334272	0.00324908
	6.81012	0.0217436	0.020546	0.0194336	0.0183994	0.0174366	0.0165394	0.0157025	0.0149209	0.0141904	0.0135068	0.0128665	0.0122664	0.0117032	0.0111743	0.0106771	0.0102094	0.00976898	0.00935398	0.0089626	0.0085932	0.00824429	0.00791448	0.0076025	0.00730718	0.00702742	0.00676224	0.00651069	0.00627193	0.00604515	0.00582963	0.00562467	0.00542964	0.00524395	0.00506705	0.00489843	0.0047376	0.00458414	0.00443761	0.00429764	0.00416386	0.00403593	0.00391354	0.00379639	0.0036842	0.00357671	0.00347368	0.00337488	0.00328009
	6.83787	0.0220712	0.020852	0.0197199	0.0186674	0.0176878	0.0167752	0.0159239	0.015129	0.0143862	0.0136912	0.0130404	0.0124303	0.011858	0.0113206	0.0108155	0.0103404	0.00989304	0.00947158	0.00907415	0.0086991	0.00834489	0.00801012	0.00769348	0.00739378	0.00710991	0.00684086	0.00658568	0.00634349	0.00611349	0.00589492	0.00568708	0.00548934	0.00530109	0.00512177	0.00495085	0.00478786	0.00463234	0.00448386	0.00434204	0.00420651	0.00407692	0.00395295	0.0038343	0.00372068	0.00361183	0.00350751	0.00340748	0.00331151
	6.86564	0.0224052	0.021164	0.0200117	0.0189406	0.0179439	0.0170153	0.0161494	0.015341	0.0145856	0.013879	0.0132173	0.0125973	0.0120156	0.0114695	0.0109563	0.0104736	0.0100192	0.00959118	0.00918759	0.00880678	0.00844717	0.00810733	0.00778594	0.00748178	0.00719373	0.00692074	0.00666185	0.00641618	0.00618288	0.00596122	0.00575046	0.00554996	0.0053591	0.00517731	0.00500406	0.00483886	0.00468125	0.00453079	0.00438709	0.00424978	0.0041185	0.00399292	0.00387274	0.00375767	0.00364745	0.00354181	0.00344052	0.00334337
	6.89344	0.0227458	0.0214822	0.0203092	0.0192191	0.0182048	0.01726	0.0163791	0.0155569	0.0147887	0.0140702	0.0133975	0.0127672	0.012176	0.011621	0.0110995	0.0106091	0.0101476	0.00971282	0.00930295	0.00891626	0.00855115	0.00820615	0.00787992	0.00757122	0.0072789	0.0070019	0.00673924	0.00649001	0.00625337	0.00602855	0.00581481	0.0056115	0.00541798	0.00523368	0.00505806	0.00489062	0.00473088	0.00457841	0.0044328	0.00429367	0.00416067	0.00403346	0.00391173	0.00379518	0.00368355	0.00357658	0.00347403	0.00337566
	6.92126	0.0230931	0.0218066	0.0206125	0.0195029	0.0184707	0.0175094	0.0166132	0.0157768	0.0149955	0.0142649	0.0135809	0.0129402	0.0123392	0.0117752	0.0112453	0.0107471	0.0102782	0.00983655	0.00942027	0.00902759	0.00865686	0.00830661	0.00797545	0.00766213	0.00736546	0.00708437	0.00681786	0.00656501	0.00632497	0.00609693	0.00588016	0.00567399	0.00547777	0.00529092	0.00511288	0.00494315	0.00478125	0.00462673	0.00447917	0.0043382	0.00420345	0.00407458	0.00395127	0.00383323	0.00372017	0.00361184	0.00350799	0.00340839
	6.9491	0.0234474	0.0221374	0.0209217	0.0197922	0.0187417	0.0177635	0.0168517	0.0160009	0.0152062	0.0144631	0.0137677	0.0131163	0.0125054	0.0119321	0.0113936	0.0108874	0.010411	0.0099624	0.0095396	0.0091408	0.00876436	0.00840875	0.00807256	0.00775452	0.00745342	0.00716817	0.00689775	0.00664121	0.00639769	0.00616638	0.00594653	0.00573744	0.00553847	0.00534902	0.00516853	0.00499647	0.00483236	0.00467576	0.00452623	0.00438338	0.00424685	0.00411629	0.00399138	0.00387181	0.0037573	0.00364759	0.00354243	0.00344158
	6.97697	0.0238088	0.0224747	0.021237	0.0200872	0.0190179	0.0180225	0.0170947	0.0162292	0.0154208	0.0146651	0.0139579	0.0132956	0.0126746	0.0120919	0.0115446	0.0110302	0.0105462	0.0100904	0.00966097	0.00925594	0.00887367	0.00851259	0.00817129	0.00784843	0.00754282	0.00725333	0.00697892	0.00671863	0.00647157	0.00623693	0.00601393	0.00580188	0.00560011	0.00540801	0.00522502	0.00505059	0.00488425	0.00472552	0.00457398	0.00442922	0.00429088	0.0041586	0.00403206	0.00391094	0.00379496	0.00368384	0.00357735	0.00347523
	7.00486	0.0241774	0.0228188	0.0215585	0.0203879	0.0192995	0.0182864	0.0173424	0.0164617	0.0156394	0.0148708	0.0141516	0.0134781	0.0128468	0.0122545	0.0116983	0.0111755	0.0106837	0.0102207	0.00978443	0.00937305	0.00898483	0.00861818	0.00827165	0.0079439	0.00763369	0.00733987	0.0070614	0.00679728	0.00654662	0.00630859	0.00608239	0.00586732	0.0056627	0.00546791	0.00528236	0.00510553	0.0049369	0.00477602	0.00462243	0.00447574	0.00433556	0.00420153	0.00407332	0.00395063	0.00383315	0.00372061	0.00361275	0.00350934
	7.03277	0.0245535	0.0231698	0.0218863	0.0206945	0.0195866	0.0185554	0.0175947	0.0166987	0.0158621	0.0150803	0.0143489	0.0136641	0.0130222	0.01242	0.0118547	0.0113234	0.0108236	0.0103532	0.00991002	0.00949216	0.00909787	0.00872555	0.0083737	0.00804095	0.00772605	0.00742783	0.00714521	0.0068772	0.00662288	0.00638138	0.00615193	0.00593378	0.00572626	0.00552873	0.00534059	0.0051613	0.00499036	0.00482727	0.0046716	0.00452294	0.00438088	0.00424508	0.00411519	0.00399089	0.00387188	0.00375789	0.00364866	0.00354393
	7.06071	0.0249371	0.0235277	0.0222207	0.0210072	0.0198793	0.0188297	0.0178519	0.0169402	0.016089	0.0152937	0.0145498	0.0138534	0.0132007	0.0125886	0.0120139	0.0114739	0.010966	0.010488	0.0100378	0.00961332	0.00921285	0.00883473	0.00847746	0.00813962	0.00781994	0.00751723	0.00723039	0.00695841	0.00670035	0.00645534	0.00622257	0.00600129	0.00579081	0.00559048	0.00539971	0.00521793	0.00504462	0.0048793	0.00472151	0.00457083	0.00442687	0.00428926	0.00415765	0.00403172	0.00391117	0.0037957	0.00368507	0.00357901
	7.08867	0.0253286	0.0238929	0.0225618	0.0213261	0.0201777	0.0191092	0.0181141	0.0171862	0.0163202	0.0155112	0.0147545	0.0140462	0.0133826	0.0127602	0.0121759	0.011627	0.0111109	0.0106252	0.0101678	0.00973657	0.00932979	0.00894577	0.00858296	0.00823994	0.00791539	0.00760811	0.00731697	0.00704094	0.00677907	0.00653047	0.00629432	0.00606985	0.00585636	0.00565319	0.00545973	0.00527541	0.0050997	0.0049321	0.00477216	0.00461944	0.00447355	0.00433409	0.00420074	0.00407315	0.00395102	0.00383406	0.00372199	0.00361457
	7.11665	0.0257281	0.0242655	0.0229097	0.0216513	0.020482	0.0193942	0.0183813	0.017437	0.0165558	0.0157327	0.014963	0.0142426	0.0135677	0.0129349	0.0123409	0.011783	0.0112584	0.0107648	0.0103	0.00986195	0.00944875	0.00905871	0.00869026	0.00834194	0.00801243	0.00770048	0.00740496	0.00712481	0.00685907	0.00660681	0.00636722	0.0061395	0.00592295	0.00571688	0.00552069	0.00533378	0.00515562	0.00498571	0.00482357	0.00466878	0.00452091	0.00437959	0.00424445	0.00411518	0.00399144	0.00387296	0.00375944	0.00365064
	7.14466	0.0261357	0.0246457	0.0232646	0.0219829	0.0207923	0.0196848	0.0186537	0.0176927	0.0167959	0.0159584	0.0151754	0.0144426	0.0137563	0.0131128	0.0125089	0.0119417	0.0114085	0.0109069	0.0104346	0.00998952	0.00956976	0.00917358	0.00879937	0.00844566	0.00811109	0.00779439	0.0074944	0.00721006	0.00694036	0.00668438	0.00644128	0.00621025	0.00599058	0.00578157	0.00558259	0.00539305	0.0052124	0.00504013	0.00487576	0.00471885	0.00456897	0.00442575	0.00428881	0.00415782	0.00403245	0.00391241	0.00379743	0.00368722
	7.17269	0.0265517	0.0250335	0.0236266	0.0223212	0.0211087	0.0199811	0.0189315	0.0179532	0.0170406	0.0161884	0.0153918	0.0146464	0.0139483	0.0132939	0.0126799	0.0121033	0.0115614	0.0110515	0.0105716	0.0101193	0.00969286	0.00929042	0.00891035	0.00855114	0.00821141	0.00788986	0.00758532	0.0072967	0.00702297	0.0067632	0.00651652	0.00628213	0.00605928	0.00584727	0.00564545	0.00545323	0.00527005	0.00509538	0.00492874	0.00476967	0.00461775	0.00447259	0.00433382	0.00420108	0.00407405	0.00395244	0.00383595	0.00372432
	7.20075	0.0269763	0.0254294	0.023996	0.0226663	0.0214315	0.0202833	0.0192146	0.0182188	0.01729	0.0164228	0.0156123	0.014854	0.014144	0.0134784	0.0128541	0.0122678	0.0117169	0.0111987	0.0107109	0.0102514	0.00981811	0.00940928	0.00902322	0.00865841	0.00831341	0.00798693	0.00767775	0.00738477	0.00710693	0.0068433	0.00659298	0.00635516	0.00612907	0.005914	0.0057093	0.00551435	0.00532859	0.00515147	0.00498252	0.00482126	0.00466727	0.00452013	0.00437949	0.00424497	0.00411626	0.00399305	0.00387503	0.00376195
	7.22882	0.0274098	0.0258333	0.0243729	0.0230184	0.0217607	0.0205914	0.0195033	0.0184896	0.0175443	0.0166617	0.015837	0.0150655	0.0143432	0.0136663	0.0130314	0.0124354	0.0118753	0.0113485	0.0108528	0.0103858	0.00994554	0.00953019	0.00913804	0.0087675	0.00841715	0.00808563	0.00777172	0.00747429	0.00719227	0.00692471	0.00667068	0.00642936	0.00619997	0.00598179	0.00577415	0.00557642	0.00538803	0.00520843	0.00503712	0.00487363	0.00471752	0.00456839	0.00442584	0.00428952	0.00415909	0.00403424	0.00391468	0.00380012
	7.25692	0.0278522	0.0262456	0.0247575	0.0233776	0.0220965	0.0209057	0.0197978	0.0187657	0.0178034	0.0169052	0.0160659	0.015281	0.0145462	0.0138577	0.0132121	0.0126059	0.0120365	0.0115011	0.0109972	0.0105226	0.0100752	0.00965322	0.00925484	0.00887847	0.00852264	0.00818599	0.00786726	0.0075653	0.00727902	0.00700744	0.00674963	0.00650475	0.006272	0.00605065	0.00584002	0.00563946	0.00544839	0.00526626	0.00509256	0.0049268	0.00476854	0.00461736	0.00447287	0.00433472	0.00420254	0.00407604	0.0039549	0.00383884
	7.28505	0.0283039	0.0266664	0.0251501	0.0237441	0.0224391	0.0212263	0.020098	0.0190472	0.0180676	0.0171533	0.0162992	0.0155006	0.0147531	0.0140527	0.013396	0.0127796	0.0122007	0.0116563	0.0111441	0.0106618	0.0102072	0.00977838	0.00937366	0.00899134	0.00862994	0.00828805	0.00796441	0.00765782	0.0073672	0.00709153	0.00682988	0.00658137	0.00634519	0.00612061	0.00590693	0.00570349	0.0055097	0.00532499	0.00514884	0.00498077	0.00482032	0.00466707	0.00452062	0.00438059	0.00424664	0.00411844	0.0039957	0.00387811
	7.3132	0.028765	0.027096	0.0255507	0.0241181	0.0227886	0.0215533	0.0204042	0.0193343	0.0183369	0.0174063	0.016537	0.0157243	0.0149638	0.0142513	0.0135834	0.0129565	0.0123678	0.0118144	0.0112937	0.0108034	0.0103414	0.00990575	0.00949454	0.00910616	0.00873907	0.00839185	0.00806319	0.0077519	0.00745685	0.00717701	0.00691143	0.00665922	0.00641956	0.00619169	0.0059749	0.00576853	0.00557196	0.00538463	0.005206	0.00503558	0.0048729	0.00471753	0.00456907	0.00442714	0.00429139	0.00416147	0.0040371	0.00391796
	7.34137	0.0292359	0.0275346	0.0259596	0.0244998	0.0231452	0.0218868	0.0207165	0.019627	0.0186115	0.0176642	0.0167794	0.0159524	0.0151785	0.0144537	0.0137742	0.0131367	0.012538	0.0119753	0.011446	0.0109476	0.0104781	0.0100354	0.00961754	0.00922297	0.00885007	0.00849741	0.00816364	0.00784755	0.00754798	0.0072639	0.00699432	0.00673835	0.00649513	0.00626391	0.00604395	0.00583459	0.0056352	0.0054452	0.00526404	0.00509122	0.00492628	0.00476876	0.00461826	0.00447439	0.0043368	0.00420514	0.0040791	0.00395838
	7.36957	0.0297168	0.0279823	0.0263769	0.0248893	0.0235091	0.0222271	0.0210351	0.0199255	0.0188916	0.0179271	0.0170265	0.0161848	0.0153973	0.0146599	0.0139687	0.0133202	0.0127114	0.0121392	0.011601	0.0110944	0.0106172	0.0101672	0.00974269	0.00934181	0.00896299	0.00860478	0.0082658	0.00794481	0.00764065	0.00735223	0.00707858	0.00681876	0.00657193	0.0063373	0.00611412	0.00590171	0.00569944	0.00550671	0.00532298	0.00514773	0.00498047	0.00482076	0.00466819	0.00452235	0.00438288	0.00424945	0.00412172	0.0039994
	7.39778	0.0302078	0.0284395	0.026803	0.0252868	0.0238804	0.0225744	0.0213601	0.02023	0.0191771	0.0181952	0.0172784	0.0164217	0.0156203	0.0148699	0.0141668	0.0135072	0.0128879	0.0123061	0.0117589	0.0112439	0.0107588	0.0103015	0.00987005	0.00946272	0.00907787	0.008714	0.00836971	0.00804372	0.00773487	0.00744204	0.00716423	0.0069005	0.00664998	0.00641187	0.0061854	0.00596989	0.00576469	0.0055692	0.00538284	0.00520511	0.0050355	0.00487356	0.00471887	0.00457103	0.00442966	0.00429442	0.00416497	0.00404101
	7.42603	0.0307094	0.0289063	0.027238	0.0256926	0.0242594	0.0229287	0.0216917	0.0205406	0.0194684	0.0184685	0.0175352	0.0166631	0.0158475	0.015084	0.0143686	0.0136976	0.0130678	0.012476	0.0119196	0.011396	0.0109029	0.0104381	0.00999965	0.00958576	0.00919475	0.0088251	0.00847539	0.00814432	0.00783068	0.00753335	0.00725131	0.00698359	0.00672931	0.00648765	0.00625784	0.00603917	0.00583099	0.00563267	0.00544364	0.00526338	0.00509138	0.00492717	0.00477033	0.00462045	0.00447714	0.00434006	0.00420886	0.00408324
	7.45429	0.0312217	0.029383	0.0276822	0.0261069	0.0246462	0.0232902	0.02203	0.0208575	0.0197654	0.0187473	0.017797	0.0169093	0.0160792	0.0153022	0.0145742	0.0138916	0.0132509	0.0126491	0.0120833	0.011551	0.0110496	0.0105772	0.0101316	0.00971095	0.00931367	0.00893812	0.00858289	0.00824662	0.00792811	0.00762619	0.00733983	0.00706805	0.00680994	0.00656467	0.00633145	0.00610956	0.00589834	0.00569714	0.0055054	0.00532256	0.00514812	0.00498161	0.00482257	0.00467061	0.00452533	0.00438638	0.0042534	0.00412609
	7.48258	0.0317449	0.0298699	0.0281357	0.0265299	0.025041	0.0236592	0.0223751	0.0211807	0.0200684	0.0190315	0.018064	0.0171603	0.0163153	0.0155245	0.0147838	0.0140893	0.0134375	0.0128254	0.01225	0.0117087	0.011199	0.0107187	0.0102658	0.00983837	0.00943467	0.00905312	0.00869224	0.00835069	0.00802719	0.0077206	0.00742984	0.00715391	0.0068919	0.00664294	0.00640625	0.00618109	0.00596676	0.00576264	0.00556813	0.00538267	0.00520575	0.00503688	0.00487562	0.00472154	0.00457426	0.0044334	0.00429861	0.00416958
	7.51089	0.0322795	0.0303672	0.0285989	0.0269617	0.0254441	0.0240358	0.0227274	0.0215105	0.0203775	0.0193215	0.0183363	0.0174161	0.016556	0.0157511	0.0149973	0.0142907	0.0136277	0.013005	0.0124198	0.0118693	0.0113511	0.0108628	0.0104025	0.00996804	0.0095578	0.00917012	0.00880349	0.00845653	0.00812797	0.00781661	0.00752136	0.00724121	0.00697522	0.00672251	0.00648228	0.00625377	0.00603629	0.00582919	0.00563185	0.00544372	0.00526428	0.00509301	0.00492948	0.00477326	0.00462393	0.00448112	0.0043445	0.00421372
	7.53923	0.0328257	0.0308752	0.0290719	0.0274026	0.0258556	0.0244202	0.0230869	0.021847	0.0206928	0.0196172	0.0186139	0.0176771	0.0168014	0.0159821	0.015215	0.0144959	0.0138213	0.013188	0.0125927	0.0120329	0.011506	0.0110096	0.0105416	0.0101	0.00968311	0.00928917	0.00891668	0.00856421	0.00823047	0.00791425	0.00761443	0.00732997	0.00705992	0.00680339	0.00655955	0.00632764	0.00610694	0.0058968	0.00569659	0.00550574	0.00532372	0.00515002	0.00498418	0.00482576	0.00467435	0.00452958	0.00439107	0.00425851
	7.56759	0.0333838	0.0313942	0.029555	0.0278529	0.0262757	0.0248126	0.0234537	0.0221904	0.0210145	0.0199189	0.0188971	0.0179431	0.0170516	0.0162176	0.0154368	0.0147051	0.0140187	0.0133743	0.0127689	0.0121995	0.0116637	0.011159	0.0106832	0.0102344	0.00981064	0.00941032	0.00903184	0.00867376	0.00833474	0.00801356	0.00770907	0.00742022	0.00714603	0.0068856	0.00663809	0.00640271	0.00617874	0.0059655	0.00576236	0.00556875	0.0053841	0.00520792	0.00503973	0.00487907	0.00472555	0.00457876	0.00443835	0.00430398
	7.59597	0.0339541	0.0319244	0.0300485	0.0283127	0.0267047	0.0252132	0.0238282	0.0225408	0.0213428	0.0202267	0.0191859	0.0182144	0.0173067	0.0164577	0.0156629	0.0149182	0.0142198	0.0135642	0.0129483	0.0123692	0.0118243	0.0113111	0.0108274	0.0103711	0.00994044	0.00953361	0.00914902	0.00878521	0.00844081	0.00811457	0.00780532	0.00751199	0.00723359	0.00696919	0.00671793	0.00647901	0.0062517	0.00603531	0.00582919	0.00563275	0.00544544	0.00526673	0.00509614	0.00493321	0.00477753	0.0046287	0.00448635	0.00435013
	7.62438	0.0345369	0.0324661	0.0305527	0.0287824	0.0271427	0.0256222	0.0242105	0.0228985	0.0216777	0.0205407	0.0194806	0.0184912	0.0175668	0.0167025	0.0158934	0.0151355	0.0144247	0.0137577	0.0131311	0.0125421	0.0119879	0.011466	0.0109742	0.0105103	0.0100726	0.00965908	0.00926826	0.0088986	0.00854871	0.00821731	0.00790322	0.00760532	0.00732262	0.00705417	0.00679909	0.00655657	0.00632586	0.00610625	0.00589709	0.00569778	0.00550775	0.00532646	0.00515343	0.0049882	0.00483032	0.00467941	0.00453508	0.00439698
	7.6528	0.0351325	0.0330197	0.0310677	0.0292622	0.0275901	0.0260398	0.0246007	0.0232635	0.0220195	0.0208611	0.0197812	0.0187734	0.0178321	0.0169521	0.0161284	0.0153569	0.0146336	0.0139549	0.0133174	0.0127182	0.0121545	0.0116237	0.0111236	0.0106521	0.0102071	0.0097868	0.00938962	0.00901399	0.0086585	0.00832184	0.00800279	0.00770024	0.00741316	0.00714057	0.0068816	0.00663541	0.00640123	0.00617835	0.00596609	0.00576386	0.00557105	0.00538714	0.00521163	0.00504403	0.00488393	0.00473089	0.00458455	0.00444454
	7.68126	0.0357413	0.0335854	0.0315939	0.0297522	0.028047	0.0264662	0.0249992	0.0236361	0.0223684	0.021188	0.0200878	0.0190614	0.0181027	0.0172066	0.016368	0.0155827	0.0148465	0.0141558	0.0135072	0.0128976	0.0123242	0.0117844	0.0112759	0.0107964	0.010344	0.0099168	0.00951313	0.00913141	0.0087702	0.00842817	0.00810408	0.00779678	0.00750523	0.00722844	0.00696549	0.00671555	0.00647784	0.00625162	0.00603622	0.00583099	0.00563537	0.00544879	0.00527074	0.00510075	0.00493837	0.00478317	0.00463478	0.00449282
	7.70973	0.0363637	0.0341635	0.0321316	0.0302529	0.0285137	0.0269017	0.025406	0.0240166	0.0227245	0.0215216	0.0204007	0.0193551	0.0183787	0.0174661	0.0166123	0.0158128	0.0150635	0.0143606	0.0137005	0.0130803	0.0124971	0.011948	0.0114309	0.0109433	0.0104834	0.0100491	0.00963884	0.00925091	0.00888387	0.00853636	0.00820712	0.00789498	0.00759887	0.00731778	0.00705079	0.00679704	0.00655572	0.0063261	0.00610748	0.00589922	0.00570072	0.00551141	0.00533079	0.00515836	0.00499366	0.00483627	0.00468579	0.00454185
	7.73823	0.037	0.0347545	0.0326812	0.0307645	0.0289904	0.0273465	0.0258214	0.0244049	0.0230879	0.0218621	0.02072	0.0196548	0.0186602	0.0177308	0.0168615	0.0160475	0.0152847	0.0145693	0.0138976	0.0132666	0.0126732	0.0121147	0.0115888	0.011093	0.0106253	0.0101839	0.0097668	0.00937253	0.00899954	0.00864644	0.00831195	0.00799487	0.00769411	0.00740864	0.00713753	0.00687988	0.00663489	0.0064018	0.00617991	0.00596855	0.00576712	0.00557504	0.00539179	0.00521687	0.00504981	0.00489018	0.00473758	0.00459162
	7.76675	0.0376505	0.0353585	0.0332428	0.0312872	0.0294775	0.0278008	0.0262456	0.0248015	0.023459	0.0222097	0.0210458	0.0199605	0.0189474	0.0180008	0.0171155	0.0162868	0.0155102	0.014782	0.0140985	0.0134563	0.0128526	0.0122845	0.0117496	0.0112454	0.0107699	0.010321	0.00989706	0.00949632	0.00911726	0.00875846	0.0084186	0.00809649	0.00779098	0.00750105	0.00722573	0.00696412	0.00671538	0.00647876	0.00625353	0.00603901	0.0058346	0.0056397	0.00545377	0.00527631	0.00510685	0.00494495	0.00479018	0.00464217
	7.7953	0.0383156	0.0359761	0.0338168	0.0318213	0.0299751	0.0282649	0.0266789	0.0252064	0.0238378	0.0225644	0.0213784	0.0202725	0.0192404	0.0182762	0.0173746	0.0165307	0.0157402	0.0149989	0.0143032	0.0136497	0.0130355	0.0124575	0.0119134	0.0114006	0.010917	0.0104607	0.0100297	0.00962232	0.00923706	0.00887244	0.00852713	0.00819987	0.00788953	0.00759504	0.00731543	0.00704977	0.00679722	0.006557	0.00632836	0.00611063	0.00590317	0.0057054	0.00551674	0.0053367	0.0051648	0.00500057	0.0048436	0.00469349
	7.82387	0.0389958	0.0366075	0.0344035	0.0323672	0.0304836	0.028739	0.0271215	0.0256199	0.0242246	0.0229266	0.0217178	0.0205909	0.0195394	0.0185572	0.0176389	0.0167795	0.0159746	0.01522	0.0145118	0.0138468	0.0132218	0.0126338	0.0120802	0.0115587	0.0110669	0.0106029	0.0101647	0.00975059	0.00935901	0.00898845	0.00863755	0.00830505	0.00798978	0.00769065	0.00740666	0.00713688	0.00688044	0.00663654	0.00640443	0.00618343	0.00597287	0.00577216	0.00558073	0.00539806	0.00522366	0.00505707	0.00489785	0.00474562
	7.85246	0.0396915	0.037253	0.0350033	0.0329252	0.0310032	0.0292234	0.0275735	0.0260423	0.0246196	0.0232963	0.0220642	0.0209159	0.0198444	0.0188438	0.0179085	0.0170333	0.0162137	0.0154454	0.0147246	0.0140477	0.0134116	0.0128134	0.0122502	0.0117197	0.0112196	0.0107477	0.0103021	0.00988118	0.00948314	0.00910652	0.00874993	0.00841208	0.00809177	0.0077879	0.00749945	0.00722546	0.00696506	0.00671741	0.00648177	0.00625742	0.00604371	0.00584001	0.00564575	0.0054604	0.00528346	0.00511446	0.00495296	0.00479856
	7.88108	0.040403	0.0379132	0.0356166	0.0334955	0.0315342	0.0297184	0.0280354	0.0264737	0.0250229	0.0236738	0.0224179	0.0212475	0.0201557	0.0191363	0.0181835	0.0172921	0.0164575	0.0156752	0.0149414	0.0142525	0.0136052	0.0129964	0.0124234	0.0118838	0.0113751	0.0108952	0.0104421	0.0100141	0.0096095	0.0092267	0.0088643	0.00852099	0.00819554	0.00788684	0.00759384	0.00731556	0.00705111	0.00679965	0.0065604	0.00633265	0.00611571	0.00590896	0.00571182	0.00552374	0.00534422	0.00517276	0.00500894	0.00485233
	7.90971	0.0411308	0.0385883	0.0362436	0.0340785	0.0320769	0.0302241	0.0285072	0.0269143	0.0254349	0.0240593	0.022779	0.021586	0.0204734	0.0194347	0.0184641	0.0175562	0.0167061	0.0159096	0.0151625	0.0144612	0.0138024	0.0131829	0.0125999	0.0120509	0.0115334	0.0110454	0.0105847	0.0101495	0.00973815	0.00934903	0.0089807	0.00863182	0.00830114	0.0079875	0.00768985	0.0074072	0.00713862	0.00688327	0.00664035	0.00640912	0.0061889	0.00597905	0.00577898	0.00558811	0.00540595	0.005232	0.0050658	0.00490694
	7.93838	0.0418753	0.0392789	0.0368848	0.0346746	0.0326317	0.030741	0.0289893	0.0273644	0.0258556	0.0244529	0.0231476	0.0219316	0.0207977	0.0197393	0.0187504	0.0178255	0.0169597	0.0161486	0.015388	0.0146741	0.0140034	0.013373	0.0127798	0.0122212	0.0116948	0.0111984	0.0107299	0.0102874	0.00986913	0.00947356	0.00909918	0.00874461	0.00840858	0.00808992	0.00778754	0.00750042	0.00722763	0.00696831	0.00672164	0.00648688	0.00626331	0.0060503	0.00584723	0.00565353	0.00546868	0.00529218	0.00512357	0.00496242
	7.96706	0.042637	0.0399852	0.0375405	0.0352841	0.0331988	0.0312693	0.0294819	0.0278243	0.0262854	0.024855	0.0235241	0.0222845	0.0211287	0.0200501	0.0190425	0.0181003	0.0172185	0.0163924	0.0156179	0.014891	0.0142084	0.0135667	0.012963	0.0123947	0.0118592	0.0113542	0.0108777	0.0104277	0.0100025	0.00960035	0.00921979	0.00885942	0.00851793	0.00819414	0.00788692	0.00759525	0.00731817	0.0070548	0.00680431	0.00656593	0.00633896	0.00612272	0.0059166	0.00572001	0.00553243	0.00535333	0.00518227	0.00501878
	7.99577	0.0434164	0.0407077	0.0382112	0.0359073	0.0337786	0.0318093	0.0299854	0.0282943	0.0267244	0.0252656	0.0239085	0.0226447	0.0214666	0.0203673	0.0193406	0.0183806	0.0174824	0.016641	0.0158523	0.0151123	0.0144173	0.0137642	0.0131498	0.0125715	0.0120267	0.011513	0.0110283	0.0105707	0.0101383	0.00972943	0.00934257	0.00897627	0.00862922	0.00830018	0.00798804	0.00769172	0.00741027	0.00714277	0.00688838	0.00664633	0.00641587	0.00619635	0.00598711	0.00578758	0.00559721	0.00541547	0.0052419	0.00507604
	8.0245	0.0442139	0.0414469	0.0388972	0.0365446	0.0343714	0.0323613	0.0305	0.0287744	0.027173	0.025685	0.0243011	0.0230125	0.0218116	0.0206911	0.0196448	0.0186667	0.0177516	0.0168947	0.0160914	0.0153379	0.0146304	0.0139655	0.0133402	0.0127517	0.0121973	0.0116747	0.0111817	0.0107163	0.0102766	0.00986087	0.00946757	0.00909523	0.00874249	0.00840811	0.00809093	0.00778988	0.00750396	0.00723225	0.00697389	0.00672808	0.00649408	0.0062712	0.0060588	0.00585627	0.00566305	0.00547862	0.0053025	0.00513421
	8.05326	0.0450301	0.0422033	0.0395989	0.0371964	0.0349775	0.0329256	0.0310259	0.0292652	0.0276313	0.0261135	0.0247021	0.0233882	0.0221638	0.0210217	0.0199553	0.0189587	0.0180263	0.0171534	0.0163353	0.0155679	0.0148476	0.0141707	0.0135343	0.0129353	0.0123712	0.0118396	0.011338	0.0108646	0.0104174	0.00999472	0.00959484	0.00921633	0.00885779	0.00851795	0.00819564	0.00788975	0.00759927	0.00732327	0.00706085	0.00681122	0.00657361	0.00634731	0.00613167	0.00592608	0.00572997	0.0055428	0.00536407	0.00519332
	8.08203	0.0458655	0.0429772	0.0403168	0.0378632	0.0355974	0.0335026	0.0315636	0.0297667	0.0280996	0.0265513	0.0251117	0.0237718	0.0225234	0.0213592	0.0202723	0.0192566	0.0183067	0.0174174	0.0165841	0.0158026	0.0150691	0.01438	0.0137321	0.0131225	0.0125485	0.0120075	0.0114973	0.0110157	0.0105609	0.010131	0.00972444	0.00933962	0.00897515	0.00862975	0.0083022	0.00799138	0.00769625	0.00741586	0.00714931	0.00689578	0.00665448	0.0064247	0.00620577	0.00599706	0.00579799	0.00560802	0.00542665	0.00525338
	8.11084	0.0467206	0.0437693	0.0410514	0.0385452	0.0362314	0.0340926	0.0321133	0.0302793	0.0285782	0.0269986	0.0255301	0.0241636	0.0228907	0.0217037	0.0205958	0.0195607	0.0185927	0.0176867	0.0168379	0.0160419	0.015295	0.0145934	0.0139338	0.0133133	0.0127291	0.0121786	0.0116595	0.0111696	0.010707	0.0102698	0.0098564	0.00946515	0.00909464	0.00874355	0.00841065	0.0080948	0.00779493	0.00751007	0.0072393	0.00698179	0.00673673	0.00650339	0.0062811	0.00606922	0.00586714	0.00567432	0.00549024	0.00531442
	8.13966	0.0475959	0.0445799	0.041803	0.039243	0.0368799	0.034696	0.0326753	0.0308034	0.0290674	0.0274556	0.0259576	0.0245639	0.0232658	0.0220556	0.0209261	0.0198711	0.0188847	0.0179615	0.0170968	0.0162861	0.0155254	0.0148109	0.0141395	0.0135078	0.0129132	0.012353	0.0118248	0.0113265	0.0108559	0.0104112	0.0099908	0.00959297	0.00921629	0.0088594	0.00852104	0.00820005	0.00789534	0.00760592	0.00733085	0.00706927	0.00682038	0.00658342	0.00635771	0.00614258	0.00593744	0.00574171	0.00555488	0.00537644
	8.16851	0.0484921	0.0454096	0.0425722	0.0399569	0.0375432	0.0353131	0.0332499	0.0313391	0.0295674	0.0279227	0.0263944	0.0249728	0.0236489	0.0224148	0.0212634	0.020188	0.0191827	0.018242	0.017361	0.0165351	0.0157604	0.0150328	0.0143492	0.0137061	0.0131009	0.0125308	0.0119933	0.0114862	0.0110075	0.0105553	0.0101277	0.00972314	0.00934015	0.00897734	0.00863341	0.00830717	0.00799753	0.00770345	0.00742399	0.00715827	0.00690547	0.00666482	0.00643561	0.00621718	0.0060089	0.00581022	0.00562058	0.00543948
	8.19738	0.0494096	0.046259	0.0433594	0.0406874	0.0382219	0.0359442	0.0338376	0.0318869	0.0300785	0.0284001	0.0268408	0.0253905	0.0240402	0.0227818	0.0216078	0.0205115	0.0194868	0.0185282	0.0176306	0.0167892	0.0160001	0.0152592	0.014563	0.0139083	0.0132922	0.012712	0.012165	0.0116491	0.011162	0.010702	0.0102671	0.0098557	0.00946628	0.00909742	0.0087478	0.00841621	0.00810153	0.0078027	0.00751876	0.00724882	0.00699202	0.0067476	0.00651483	0.00629303	0.00608157	0.00587987	0.00568736	0.00550356
	8.22627	0.0503492	0.0471287	0.0441652	0.0414349	0.0389162	0.0365899	0.0344386	0.032447	0.030601	0.028888	0.0272969	0.0258173	0.02444	0.0231566	0.0219595	0.0208418	0.0197974	0.0188204	0.0179057	0.0170485	0.0162446	0.01549	0.0147811	0.0141145	0.0134873	0.0128966	0.01234	0.011815	0.0113195	0.0108515	0.0104091	0.00999071	0.00959472	0.00921969	0.00886426	0.00852721	0.00820738	0.0079037	0.0076152	0.00734094	0.00708008	0.00683181	0.0065954	0.00637017	0.00615546	0.00595067	0.00575526	0.00556868
	8.25519	0.0513115	0.048019	0.0449901	0.0422	0.0396267	0.0372504	0.0350534	0.0330197	0.0311352	0.0293868	0.0277631	0.0262534	0.0248484	0.0235394	0.0223186	0.0211791	0.0201144	0.0191186	0.0181864	0.0173131	0.0164941	0.0157255	0.0150035	0.0143248	0.0136862	0.0130849	0.0125184	0.0119841	0.0114799	0.0110037	0.0105538	0.0101282	0.00972553	0.00934419	0.00898283	0.0086402	0.00831512	0.0080065	0.00771333	0.00743467	0.00716966	0.00691747	0.00667736	0.00644862	0.00623059	0.00602267	0.00582428	0.00563489
	8.28413	0.0522971	0.0489308	0.0458346	0.0429831	0.0403537	0.0379262	0.0356822	0.0336055	0.0316814	0.0298968	0.0282396	0.0266991	0.0252657	0.0239305	0.0226855	0.0215235	0.020438	0.019423	0.018473	0.0175831	0.0167487	0.0159657	0.0152304	0.0145392	0.013889	0.0132769	0.0127002	0.0121564	0.0116434	0.0111589	0.0107012	0.0102683	0.00985876	0.00947098	0.00910357	0.00875524	0.0084248	0.00811113	0.0078132	0.00753005	0.0072608	0.00700461	0.00676072	0.00652841	0.006307	0.00609588	0.00589446	0.0057022
	8.31309	0.0533066	0.0498645	0.0466992	0.0437847	0.0410978	0.0386176	0.0363255	0.0342047	0.03224	0.0304181	0.0287267	0.0271546	0.0256921	0.02433	0.0230602	0.0218753	0.0207685	0.0197338	0.0187655	0.0178586	0.0170085	0.0162108	0.0154618	0.0147579	0.0140958	0.0134726	0.0128855	0.0123321	0.01181	0.011317	0.0108513	0.010411	0.00999447	0.0096001	0.00922651	0.00887237	0.00853646	0.00821763	0.00791485	0.00762712	0.00735354	0.00709327	0.00684553	0.00660957	0.00638471	0.00617033	0.00596582	0.00577063
	8.34208	0.0543408	0.0508208	0.0475846	0.0446054	0.0418595	0.0393253	0.0369837	0.0348175	0.0328113	0.0309512	0.0292246	0.0276202	0.0261279	0.0247383	0.023443	0.0222346	0.0211061	0.0200511	0.0190641	0.0181399	0.0172736	0.0164609	0.0156979	0.0149809	0.0143067	0.0136722	0.0130745	0.0125112	0.0119798	0.0114782	0.0110043	0.0105564	0.0101327	0.00973162	0.00935172	0.00899164	0.00865014	0.00832605	0.00801831	0.0077259	0.00744792	0.00718348	0.0069318	0.00669212	0.00646375	0.00624604	0.00603838	0.0058402
	8.37109	0.0554004	0.0518004	0.0484913	0.0454457	0.0426391	0.0400495	0.0376572	0.0354445	0.0333957	0.0314964	0.0297337	0.0280962	0.0265732	0.0251554	0.0238341	0.0226016	0.0214508	0.0203752	0.019369	0.018427	0.0175441	0.0167161	0.0159388	0.0152085	0.0145219	0.0138757	0.0132672	0.0126938	0.0121529	0.0116424	0.0111603	0.0107046	0.0102735	0.00986559	0.00947924	0.0091131	0.00876589	0.00843643	0.00812362	0.00782645	0.00754396	0.00727528	0.00701958	0.00677611	0.00654415	0.00632304	0.00611217	0.00591095
	8.40012	0.0564861	0.0528038	0.0494199	0.0463061	0.0434373	0.0407907	0.0383464	0.036086	0.0339934	0.0320539	0.0302543	0.0285828	0.0270285	0.0255817	0.0242337	0.0229765	0.0218028	0.0207061	0.0196803	0.01872	0.0178203	0.0169765	0.0161846	0.0154407	0.0147413	0.0140833	0.0134637	0.0128799	0.0123294	0.0118098	0.0113192	0.0108555	0.010417	0.0100021	0.00960912	0.00923679	0.00888375	0.00854881	0.00823083	0.00792879	0.0076417	0.00736869	0.00710889	0.00686155	0.00662593	0.00640136	0.00618721	0.00598289
	8.42918	0.0575987	0.0538319	0.0503711	0.0471873	0.0442545	0.0415495	0.0390517	0.0367424	0.0346049	0.0326242	0.0307867	0.0290802	0.0274938	0.0260174	0.0246421	0.0233596	0.0221625	0.0210441	0.0199982	0.0190193	0.0181022	0.0172423	0.0164354	0.0156775	0.0149652	0.014295	0.0136641	0.0130697	0.0125093	0.0119805	0.0114812	0.0110093	0.0105632	0.0101411	0.00974142	0.00936276	0.00900378	0.00866323	0.00833998	0.00803296	0.00774119	0.00746375	0.00719978	0.00694849	0.00670913	0.00648103	0.00626354	0.00605605
	8.45826	0.058739	0.0548854	0.0513456	0.0480897	0.0450913	0.0423263	0.0397737	0.0374141	0.0352305	0.0332075	0.0313312	0.0295889	0.0279696	0.0264628	0.0250594	0.023751	0.0225299	0.0213893	0.0203228	0.0193248	0.01839	0.0175136	0.0166914	0.0159192	0.0151935	0.014511	0.0138685	0.0132633	0.0126927	0.0121544	0.0116462	0.0111661	0.0107122	0.0102827	0.0098762	0.00949108	0.00912602	0.00877975	0.00845112	0.00813902	0.00784246	0.0075605	0.00729226	0.00703694	0.00679378	0.00656208	0.00634117	0.00613045
	8.48736	0.0599077	0.0559649	0.0523439	0.0490141	0.0459482	0.0431217	0.0405127	0.0381015	0.0358707	0.0338043	0.031888	0.0301091	0.028456	0.0269181	0.0254859	0.0241509	0.0229053	0.0217419	0.0206543	0.0196368	0.0186838	0.0177906	0.0169526	0.0161659	0.0154266	0.0147313	0.014077	0.0134607	0.0128798	0.0123318	0.0118145	0.0113259	0.010864	0.0104271	0.0100135	0.00962179	0.00925052	0.00889841	0.00856428	0.008247	0.00794555	0.00765898	0.00738639	0.00712696	0.00687991	0.00664453	0.00642015	0.00620614
	8.51648	0.0611058	0.0570712	0.0533668	0.0499611	0.0468259	0.0439361	0.0412692	0.0388052	0.0365258	0.0344148	0.0324577	0.0306412	0.0289533	0.0273835	0.0259218	0.0245596	0.0232888	0.0221021	0.020993	0.0199554	0.0189838	0.0180733	0.0172193	0.0164176	0.0156643	0.0149561	0.0142896	0.013662	0.0130705	0.0125126	0.0119861	0.0114888	0.0110187	0.0105742	0.0101534	0.00975495	0.00937734	0.00901926	0.00867951	0.00835694	0.0080505	0.00775922	0.00748219	0.00721856	0.00696755	0.00672842	0.00650049	0.00628312
	8.54563	0.0623341	0.0582052	0.054415	0.0509312	0.0477249	0.0447701	0.0420439	0.0395254	0.0371962	0.0350396	0.0330405	0.0311853	0.029462	0.0278593	0.0263675	0.0249773	0.0236807	0.0224702	0.0213389	0.0202808	0.0192902	0.018362	0.0174915	0.0166745	0.015907	0.0151854	0.0145066	0.0138674	0.013265	0.012697	0.012161	0.0116548	0.0111764	0.010724	0.010296	0.00989061	0.00950652	0.00914236	0.00879686	0.00846889	0.00815736	0.00786127	0.00757971	0.00731179	0.00705673	0.00681378	0.00658223	0.00636143
	8.5748	0.0635934	0.0593676	0.0554893	0.0519253	0.0486458	0.0456243	0.042837	0.0402628	0.0378825	0.0356789	0.0336367	0.031742	0.0299821	0.0283459	0.0268231	0.0254043	0.0240813	0.0228462	0.0216923	0.0206131	0.019603	0.0186567	0.0177694	0.0169367	0.0161546	0.0154195	0.0147279	0.0140768	0.0134634	0.012885	0.0123393	0.011824	0.0113372	0.0108768	0.0104412	0.0100288	0.00963813	0.00926774	0.00891639	0.00858289	0.00826616	0.00796517	0.00767897	0.00740669	0.0071475	0.00690064	0.00666539	0.0064411
	8.60399	0.0648848	0.0605593	0.0565904	0.0529439	0.0495893	0.0464992	0.0436493	0.0410178	0.0385849	0.0363332	0.0342468	0.0323114	0.0305142	0.0288435	0.0272889	0.0258408	0.0244906	0.0232305	0.0220534	0.0209527	0.0199226	0.0189577	0.0180531	0.0172044	0.0164074	0.0156583	0.0149537	0.0142905	0.0136658	0.0130768	0.0125212	0.0119966	0.011501	0.0110325	0.0105893	0.0101697	0.00977222	0.00939547	0.00903813	0.008699	0.00837695	0.00807095	0.00778003	0.00750328	0.00723987	0.00698903	0.00675001	0.00652215
	8.63321	0.0662092	0.0617811	0.0577191	0.0539879	0.050556	0.0473955	0.0444812	0.0417908	0.0393041	0.0370029	0.0348711	0.0328941	0.0310585	0.0293525	0.0277653	0.0262871	0.0249091	0.0236233	0.0224223	0.0212995	0.020249	0.0192651	0.0183429	0.0174777	0.0166654	0.015902	0.0151842	0.0145086	0.0138722	0.0132724	0.0127066	0.0121726	0.0116681	0.0111912	0.0107402	0.0103132	0.00990885	0.00952559	0.00916214	0.00881725	0.00848978	0.00817866	0.00788291	0.00760161	0.0073339	0.00707899	0.00683612	0.00660462
	8.66245	0.0675676	0.0630341	0.0588763	0.0550579	0.0515466	0.0483137	0.0453334	0.0425825	0.0400404	0.0376885	0.0355101	0.0334902	0.0316153	0.029873	0.0282524	0.0267433	0.0253369	0.0240247	0.0227993	0.0216539	0.0205824	0.0195791	0.0186387	0.0177567	0.0169287	0.0161508	0.0154193	0.014731	0.0140828	0.0134719	0.0128958	0.012352	0.0118384	0.011353	0.010894	0.0104595	0.0100481	0.00965818	0.00928848	0.0089377	0.00860469	0.00828835	0.00798767	0.00770172	0.00742961	0.00717055	0.00692376	0.00668854
	8.69171	0.068961	0.064319	0.0600627	0.0561547	0.0525619	0.0492546	0.0462063	0.0433933	0.0407943	0.0383903	0.0361641	0.0341003	0.032185	0.0304055	0.0287506	0.0272099	0.0257742	0.024435	0.0231846	0.0220161	0.0209231	0.0198998	0.0189409	0.0180417	0.0171976	0.0164048	0.0156594	0.0149581	0.0142977	0.0136755	0.0130887	0.012535	0.0120121	0.011518	0.0110508	0.0106086	0.0101899	0.00979327	0.00941719	0.00906041	0.00872173	0.00840006	0.00809434	0.00780364	0.00752705	0.00726375	0.00701295	0.00677395
	8.721	0.0703905	0.0656369	0.0612793	0.0572792	0.0536025	0.0502187	0.0471006	0.0442238	0.0415664	0.0391089	0.0368336	0.0347247	0.0327679	0.0309503	0.0292602	0.027687	0.0262213	0.0248544	0.0235784	0.0223861	0.0212711	0.0202274	0.0192495	0.0183326	0.0174722	0.016664	0.0159043	0.0151897	0.014517	0.0138831	0.0132855	0.0127216	0.0121892	0.0116862	0.0112106	0.0107606	0.0103346	0.00993094	0.00954833	0.00918541	0.00884095	0.00851383	0.00820297	0.00790742	0.00762625	0.00735862	0.00710374	0.00686086
	8.75031	0.0718571	0.0669888	0.0625269	0.0584321	0.0546692	0.0512068	0.0480169	0.0450745	0.0423572	0.0398447	0.037519	0.0353638	0.0333644	0.0315076	0.0297814	0.028175	0.0266786	0.0252833	0.023981	0.0227643	0.0216267	0.0205621	0.0195648	0.0186298	0.0177525	0.0169287	0.0161544	0.0154262	0.0147407	0.014095	0.0134863	0.012912	0.0123699	0.0118577	0.0113735	0.0109155	0.0104819	0.0100712	0.00968196	0.00931277	0.0089624	0.00862971	0.00831361	0.0080131	0.00772726	0.00745521	0.00719615	0.00694932
	8.77964	0.0733621	0.0683756	0.0638066	0.0596143	0.0557627	0.0522195	0.0489559	0.0459462	0.0431672	0.0405982	0.0382208	0.0360181	0.033975	0.032078	0.0303147	0.0286742	0.0271462	0.0257217	0.0243925	0.0231509	0.0219902	0.020904	0.0198868	0.0189333	0.0180388	0.0171989	0.0164097	0.0156676	0.0149691	0.0143112	0.0136911	0.0131062	0.0125541	0.0120326	0.0115397	0.0110735	0.0106322	0.0102142	0.00981814	0.00944254	0.00908614	0.00874775	0.00842629	0.00812072	0.0078301	0.00755354	0.00729022	0.00703937
	8.809	0.0749067	0.0697986	0.0651192	0.0608267	0.0568839	0.0532576	0.0499182	0.0468392	0.0439969	0.04137	0.0389394	0.0366878	0.0345999	0.0326616	0.0308604	0.0291848	0.0276245	0.0261701	0.0248132	0.0235461	0.0223616	0.0212535	0.0202158	0.0192434	0.0183312	0.0174749	0.0166704	0.015914	0.0152021	0.0145318	0.0139001	0.0133043	0.0127421	0.012211	0.0117091	0.0112345	0.0107853	0.01036	0.00995693	0.00957477	0.0092122	0.00886801	0.00854107	0.00823034	0.00793484	0.00765367	0.007386	0.00713103
	8.83837	0.0764919	0.0712587	0.0664659	0.0620703	0.0580337	0.0543219	0.0509046	0.0477544	0.044847	0.0421605	0.0396753	0.0373736	0.0352396	0.033259	0.0314188	0.0297072	0.0281137	0.0266287	0.0252434	0.02395	0.0227413	0.0216106	0.020552	0.0195601	0.0186299	0.0177568	0.0169366	0.0161655	0.01544	0.014757	0.0141134	0.0135065	0.0129338	0.012393	0.0118819	0.0113987	0.0109415	0.0105086	0.0100984	0.00970953	0.00934066	0.00899053	0.00865799	0.00834198	0.0080415	0.00775563	0.00748351	0.00722434
	8.86777	0.0781192	0.0727572	0.0678475	0.0633458	0.0592127	0.0554131	0.0519157	0.0486924	0.0457181	0.0429704	0.040429	0.0380759	0.0358946	0.0338705	0.0319902	0.0302417	0.0286142	0.0270977	0.0256834	0.0243631	0.0231294	0.0219756	0.0208956	0.0198837	0.018935	0.0180446	0.0172084	0.0164223	0.0156829	0.0149868	0.014331	0.0137127	0.0131293	0.0125786	0.0120582	0.0115662	0.0111007	0.01066	0.0102426	0.00984688	0.00947157	0.00911537	0.00877711	0.00845571	0.00815014	0.00785947	0.00758281	0.00731934
	8.8972	0.0797898	0.0742952	0.0692653	0.0646544	0.0604221	0.0565321	0.0529523	0.0496537	0.0466107	0.0438	0.041201	0.038795	0.0365652	0.0344964	0.032575	0.0307886	0.0291262	0.0275774	0.0261333	0.0247854	0.0235262	0.0223487	0.0212467	0.0202144	0.0192467	0.0183386	0.017486	0.0166846	0.0159309	0.0152214	0.0145531	0.0139232	0.0133289	0.0127679	0.0122379	0.0117369	0.011263	0.0108145	0.0103896	0.00998687	0.00960497	0.00924257	0.00889847	0.00857156	0.0082608	0.00796521	0.00768392	0.00741608
	8.92664	0.0815051	0.0758739	0.0707203	0.0659971	0.0616626	0.0576797	0.0540151	0.0506392	0.0475255	0.0446502	0.0419919	0.0395316	0.0372519	0.0351372	0.0331736	0.0313484	0.0296501	0.0280682	0.0265935	0.0252173	0.0239318	0.0227301	0.0216055	0.0205523	0.0195651	0.018639	0.0177695	0.0169524	0.016184	0.0154609	0.0147799	0.014138	0.0135325	0.0129611	0.0124213	0.0119111	0.0114286	0.0109719	0.0105394	0.0101296	0.00974094	0.00937221	0.00902214	0.00868959	0.00837352	0.00807293	0.0077869	0.00751458
	8.95611	0.0832664	0.0774947	0.0722136	0.0673748	0.0629352	0.0588566	0.0551049	0.0516495	0.0484631	0.0455214	0.0428022	0.0402861	0.0379551	0.0357934	0.0337864	0.0319213	0.0301861	0.0285703	0.0270642	0.025659	0.0243466	0.02312	0.0219723	0.0208977	0.0198905	0.0189459	0.0180591	0.0172259	0.0164426	0.0157054	0.0150113	0.0143572	0.0137403	0.0131582	0.0126084	0.0120888	0.0115975	0.0111325	0.0106922	0.0102751	0.00987954	0.00950433	0.00914815	0.00880986	0.00848836	0.00818264	0.00789178	0.00761489
	8.98561	0.0850753	0.0791588	0.0737465	0.0687887	0.064241	0.060064	0.0562226	0.0526854	0.0494243	0.0464142	0.0436325	0.041059	0.0386754	0.0364653	0.0344138	0.0325077	0.0307348	0.0290841	0.0275458	0.0261108	0.0247709	0.0235186	0.0223473	0.0212507	0.0202231	0.0192594	0.0183549	0.0175053	0.0167066	0.0159551	0.0152476	0.014581	0.0139524	0.0133593	0.0127992	0.01227	0.0117697	0.0112962	0.010848	0.0104234	0.0100208	0.00963899	0.00927658	0.0089324	0.00860536	0.00829441	0.00799861	0.00771705
	9.01512	0.0869333	0.0808677	0.0753203	0.0702399	0.0655808	0.0613026	0.0573689	0.0537476	0.0504097	0.0473294	0.0444834	0.0418509	0.0394132	0.0371534	0.0350563	0.0331081	0.0312963	0.0296099	0.0280385	0.0265729	0.0252047	0.0239263	0.0227306	0.0216115	0.0205629	0.0195798	0.0186572	0.0177907	0.0169762	0.0162101	0.0154889	0.0148094	0.0141689	0.0135645	0.012994	0.012455	0.0119454	0.0114633	0.0110069	0.0105746	0.0101649	0.00977625	0.00940747	0.00905728	0.00872457	0.00840828	0.00810743	0.00782111
	9.04466	0.0888419	0.0826226	0.0769361	0.0717295	0.0669559	0.0625734	0.0585449	0.054837	0.0514201	0.0482675	0.0453554	0.0426624	0.0401691	0.0378582	0.0357141	0.0337227	0.0318712	0.030148	0.0285427	0.0270457	0.0256485	0.0243432	0.0231226	0.0219803	0.0209103	0.0199072	0.018966	0.0180822	0.0172516	0.0164705	0.0157352	0.0150426	0.0143898	0.013774	0.0131927	0.0126436	0.0121246	0.0116336	0.0111689	0.0107288	0.0103117	0.00991619	0.00954088	0.00918456	0.00884605	0.0085243	0.00821829	0.0079271
	9.07422	0.0908028	0.0844252	0.0785954	0.0732588	0.0683672	0.0638775	0.0597513	0.0559544	0.0524562	0.0492293	0.0462492	0.0434939	0.0409435	0.0385802	0.0363879	0.0343521	0.0324596	0.0306987	0.0290586	0.0275294	0.0261025	0.0247696	0.0235235	0.0223574	0.0212654	0.0202418	0.0192816	0.0183801	0.017533	0.0167364	0.0159868	0.0152808	0.0146154	0.0139878	0.0133956	0.0128361	0.0123074	0.0118074	0.0113342	0.0108861	0.0104615	0.0100589	0.00967688	0.00931428	0.00896986	0.00864252	0.00833124	0.00803507
	9.1038	0.0928176	0.0862769	0.0802994	0.074829	0.0698159	0.0652158	0.060989	0.0571005	0.0535188	0.0502155	0.0471655	0.0443462	0.0417371	0.0393198	0.037078	0.0349966	0.0330621	0.0312625	0.0295866	0.0280244	0.0265669	0.0252057	0.0239334	0.0227431	0.0216285	0.0205839	0.0196041	0.0186844	0.0178204	0.0170081	0.0162437	0.0155239	0.0148457	0.0142061	0.0136026	0.0130326	0.012494	0.0119847	0.0115028	0.0110465	0.0106142	0.0102043	0.00981553	0.00944651	0.00909604	0.00876299	0.00844633	0.00814508
	9.13341	0.0948881	0.0881793	0.0820497	0.0764415	0.0713033	0.0665894	0.0622592	0.0582764	0.0546086	0.0512268	0.0481049	0.0452198	0.0425503	0.0400777	0.0377849	0.0356567	0.0336791	0.0318397	0.0301271	0.028531	0.0270421	0.0256519	0.0243527	0.0231374	0.0219996	0.0209335	0.0199338	0.0189955	0.0181141	0.0172856	0.0165061	0.0157723	0.0150809	0.014429	0.0138139	0.0132331	0.0126844	0.0121656	0.0116748	0.0112101	0.0107699	0.0103526	0.00995689	0.0095813	0.00922465	0.00888577	0.00856361	0.00825716
	9.16304	0.097016	0.090134	0.0838477	0.0780974	0.0728304	0.0679995	0.0635628	0.0594829	0.0557266	0.052264	0.0490682	0.0461153	0.0433838	0.0408542	0.0385091	0.0363328	0.0343109	0.0324306	0.0306804	0.0290495	0.0275284	0.0261084	0.0247816	0.0235407	0.0223792	0.021291	0.0202708	0.0193133	0.0184142	0.0175691	0.0167742	0.0160259	0.015321	0.0146565	0.0140296	0.0134378	0.0128787	0.0123502	0.0118502	0.011377	0.0109287	0.0105039	0.010101	0.00971873	0.00935575	0.00901091	0.00868312	0.00837136
	9.19269	0.0992034	0.0921428	0.0856949	0.0797984	0.0743986	0.0694471	0.0649007	0.060721	0.0568736	0.0533278	0.050056	0.0470335	0.0442382	0.0416501	0.0392512	0.0370254	0.034958	0.0330358	0.0312468	0.0295801	0.028026	0.0265754	0.0252203	0.0239532	0.0227673	0.0216565	0.0206152	0.0196382	0.0187209	0.0178588	0.017048	0.0162849	0.0155662	0.0148888	0.0142498	0.0136467	0.013077	0.0125385	0.0120292	0.0115472	0.0110907	0.0106582	0.010248	0.00985885	0.0094894	0.00913847	0.00880493	0.00848774
	9.22237	0.101452	0.0942073	0.087593	0.0815456	0.0760091	0.0709335	0.0662742	0.0619917	0.0580505	0.0544191	0.051069	0.0479749	0.045114	0.0424657	0.0400116	0.037735	0.0356208	0.0336555	0.0318268	0.0301234	0.0285354	0.0270534	0.0256692	0.0243751	0.0231643	0.0220303	0.0209674	0.0199704	0.0190343	0.0181548	0.0173278	0.0165496	0.0158167	0.015126	0.0144747	0.0138599	0.0132794	0.0127307	0.0122119	0.0117209	0.011256	0.0108155	0.0103979	0.0100017	0.00962567	0.0092685	0.00892908	0.00860635
	9.25207	0.103764	0.0963295	0.0895435	0.0833408	0.0776634	0.0724598	0.0676843	0.0632959	0.0592582	0.0555387	0.0521082	0.0489404	0.046012	0.0433019	0.0407909	0.0384621	0.0362998	0.0342902	0.0324207	0.0306796	0.0290567	0.0275426	0.0261285	0.0248068	0.0235703	0.0224125	0.0213275	0.0203099	0.0193547	0.0184573	0.0176137	0.0168199	0.0160726	0.0153683	0.0147043	0.0140777	0.013486	0.0129269	0.0123983	0.0118982	0.0114246	0.010976	0.0105508	0.0101474	0.00976461	0.00940107	0.00905564	0.00872724
	9.28179	0.106141	0.0985111	0.0915482	0.0851854	0.0793628	0.0740275	0.0691321	0.0646347	0.0604977	0.0566875	0.0531741	0.0499306	0.0469328	0.044159	0.0415897	0.0392071	0.0369955	0.0349404	0.0330289	0.0312491	0.0295905	0.0280432	0.0265986	0.0252485	0.0239857	0.0228035	0.0216958	0.020657	0.0196822	0.0187665	0.0179058	0.0170962	0.0163339	0.0156158	0.0149388	0.0143	0.013697	0.0131272	0.0125886	0.012079	0.0115967	0.0111398	0.0107067	0.010296	0.0099063	0.00953624	0.00918467	0.00885046
	9.31153	0.108587	0.100754	0.0936089	0.0870809	0.0811088	0.0756376	0.0706189	0.0660093	0.0617699	0.0578664	0.0542678	0.0509463	0.0478771	0.0450379	0.0424085	0.0399707	0.0377083	0.0356065	0.0336519	0.0318324	0.030137	0.0285558	0.0270797	0.0257005	0.0244106	0.0232034	0.0220724	0.021012	0.020017	0.0190826	0.0182044	0.0173784	0.016601	0.0158686	0.0151783	0.0145271	0.0139124	0.0133317	0.0127828	0.0122636	0.0117722	0.0113068	0.0108658	0.0104476	0.0100508	0.00967407	0.00931621	0.00897608
	9.3413	0.111101	0.103061	0.0957274	0.0890292	0.0829028	0.0772918	0.0721459	0.0674206	0.063076	0.0590764	0.05539	0.0519883	0.0488457	0.0459391	0.0432479	0.0407534	0.0384388	0.0362889	0.03429	0.0324297	0.0306965	0.0290805	0.0275721	0.026163	0.0248455	0.0236125	0.0224576	0.021375	0.0203594	0.0194057	0.0185096	0.0176669	0.0168738	0.0161269	0.0154229	0.014759	0.0141323	0.0135404	0.012981	0.012452	0.0119514	0.0114773	0.0110281	0.0106022	0.0101982	0.00981462	0.00945034	0.00910414
	9.37109	0.113689	0.105433	0.0979056	0.0910319	0.0847465	0.0789913	0.0737145	0.06887	0.0644169	0.0603184	0.0565416	0.0530574	0.0498391	0.0468633	0.0441086	0.0415557	0.0391875	0.0369882	0.0349438	0.0330415	0.0312696	0.0296177	0.0280762	0.0266364	0.0252904	0.024031	0.0228516	0.0217463	0.0207094	0.0197361	0.0188216	0.0179617	0.0171526	0.0163908	0.0156728	0.0149958	0.0143569	0.0137536	0.0131834	0.0126443	0.0121342	0.0116513	0.0111937	0.0107599	0.0103485	0.00995797	0.00958711	0.00923472
	9.4009	0.11635	0.107873	0.100145	0.0930907	0.0866415	0.0807376	0.0753258	0.0703586	0.0657937	0.0615933	0.0577236	0.0541543	0.0508584	0.0478113	0.0449912	0.0423783	0.0399549	0.0377049	0.0356137	0.0336682	0.0318565	0.0301678	0.0285923	0.027121	0.0257458	0.0244593	0.0232548	0.022126	0.0210674	0.0200738	0.0191405	0.0182631	0.0174376	0.0166604	0.0159281	0.0152377	0.0145863	0.0139712	0.0133901	0.0128407	0.0123209	0.0118288	0.0113627	0.0109209	0.0105018	0.0101042	0.0097266	0.00936786
	9.43073	0.119089	0.110383	0.102449	0.0952077	0.0885894	0.0825322	0.0769813	0.0718877	0.0672077	0.0629024	0.0589369	0.0552801	0.0519041	0.0487837	0.0458963	0.0432217	0.0407416	0.0384394	0.0363001	0.0343103	0.0324577	0.0307312	0.0291207	0.027617	0.0262118	0.0248976	0.0236672	0.0225145	0.0214336	0.0204193	0.0194666	0.0185711	0.0177288	0.0169359	0.016189	0.0154849	0.0148206	0.0141935	0.0136011	0.0130411	0.0125114	0.01201	0.0115351	0.0110851	0.0106583	0.0102533	0.00986886	0.00950364
	9.46059	0.121908	0.112966	0.104819	0.0973846	0.0905919	0.0843768	0.0786825	0.0734586	0.0686599	0.0642465	0.0601825	0.0564356	0.0529771	0.0497813	0.0468247	0.0440867	0.0415482	0.0391923	0.0370036	0.0349682	0.0330735	0.0313082	0.0296618	0.0281249	0.0266889	0.0253461	0.0240893	0.022912	0.0218082	0.0207725	0.0198	0.0188861	0.0180265	0.0172176	0.0164556	0.0157374	0.0150599	0.0144205	0.0138166	0.0132458	0.0127059	0.0121949	0.0117111	0.0112526	0.0108179	0.0104055	0.010014	0.00964212
	9.49047	0.124809	0.115624	0.107256	0.0996235	0.092651	0.086273	0.0804309	0.0750726	0.0701517	0.065627	0.0614613	0.0576217	0.0540784	0.0508048	0.0477771	0.0449737	0.0423752	0.0399641	0.0377246	0.0356424	0.0337045	0.0318993	0.030216	0.0286449	0.0271774	0.0258052	0.0245212	0.0233186	0.0221914	0.0211339	0.020141	0.0192081	0.0183309	0.0175054	0.016728	0.0159954	0.0153045	0.0146524	0.0140367	0.0134547	0.0129045	0.0123837	0.0118907	0.0114236	0.0109808	0.0105607	0.010162	0.00978336
	9.52037	0.127796	0.118359	0.109764	0.101926	0.0947685	0.0882225	0.0822279	0.0767311	0.0716843	0.0670448	0.0627745	0.0588393	0.0552087	0.0518552	0.0487542	0.0458836	0.0432234	0.0407555	0.0384637	0.0363333	0.0343511	0.0325048	0.0307836	0.0291775	0.0276775	0.0262752	0.0249633	0.0237347	0.0225834	0.0215035	0.0204898	0.0195374	0.0186421	0.0177997	0.0170065	0.0162591	0.0155543	0.0148893	0.0142614	0.0136682	0.0131072	0.0125765	0.0120741	0.0115981	0.011147	0.0107191	0.010313	0.00992744
	9.5503	0.130871	0.121174	0.112345	0.104296	0.0969463	0.0902269	0.0840752	0.0784356	0.073259	0.0685013	0.0641232	0.0600896	0.056369	0.0529332	0.0497568	0.046817	0.0440932	0.041567	0.0392215	0.0370416	0.0350136	0.0331252	0.0313651	0.029723	0.0281895	0.0267564	0.0254158	0.0241606	0.0229845	0.0218816	0.0208465	0.0198742	0.0189602	0.0181005	0.0172911	0.0165285	0.0158096	0.0151314	0.0144911	0.0138862	0.0133143	0.0127733	0.0122613	0.0117763	0.0113166	0.0108807	0.0104671	0.0100744
	9.58025	0.134037	0.124072	0.115001	0.106733	0.0991865	0.0922883	0.0859744	0.0801877	0.0748772	0.0699976	0.0655085	0.0613735	0.0575603	0.0540397	0.0507857	0.0477747	0.0449855	0.0423992	0.0399984	0.0377676	0.0356927	0.033761	0.0319608	0.0302817	0.028714	0.0272491	0.025879	0.0245965	0.0233951	0.0222685	0.0212114	0.0202187	0.0192856	0.0184081	0.017582	0.016804	0.0160705	0.0153787	0.0147257	0.0141088	0.0135258	0.0129743	0.0124524	0.0119581	0.0114898	0.0110457	0.0106243	0.0102244
	9.61022	0.137298	0.127055	0.117735	0.109242	0.101491	0.0944084	0.0879273	0.0819887	0.0765403	0.0715351	0.0669315	0.0626921	0.0587835	0.0551756	0.0518416	0.0487573	0.0459009	0.0432528	0.0407951	0.038512	0.0363888	0.0344125	0.0325712	0.030854	0.0292511	0.0277536	0.0263533	0.0250428	0.0238152	0.0226644	0.0215848	0.020571	0.0196184	0.0187226	0.0178795	0.0170855	0.0163372	0.0156314	0.0149654	0.0143363	0.0137418	0.0131796	0.0126476	0.0121438	0.0116665	0.011214	0.0107848	0.0103774
	9.64021	0.140657	0.130128	0.120549	0.111823	0.103862	0.0965893	0.0899357	0.0838405	0.0782498	0.0731151	0.0683935	0.0640465	0.0600396	0.0563418	0.0529255	0.0497658	0.0468401	0.0441284	0.0416122	0.0392752	0.0371024	0.0350803	0.0331967	0.0314404	0.0298013	0.0282703	0.0268389	0.0254996	0.0242453	0.0230696	0.0219668	0.0209315	0.0199588	0.0190442	0.0181837	0.0173734	0.0166098	0.0158897	0.0152103	0.0145687	0.0139624	0.0133892	0.0128469	0.0123334	0.011847	0.0113859	0.0109486	0.0105335
	9.67023	0.144117	0.133292	0.123447	0.114481	0.106303	0.098833	0.0920013	0.0857447	0.0800072	0.074739	0.0698958	0.0654379	0.0613297	0.0575393	0.0540383	0.0508008	0.0478039	0.0450267	0.0424503	0.0400579	0.037834	0.0357649	0.0338377	0.0320413	0.030365	0.0287996	0.0273363	0.0259673	0.0246855	0.0234843	0.0223577	0.0213003	0.020307	0.0193732	0.0184947	0.0176677	0.0168884	0.0161538	0.0154606	0.0148062	0.0141879	0.0136034	0.0130504	0.012527	0.0120312	0.0115613	0.0111157	0.0106929
	9.70027	0.147682	0.136551	0.126431	0.117216	0.108814	0.101142	0.0941262	0.0877029	0.0818141	0.0764083	0.0714397	0.0668674	0.0626548	0.0587691	0.0551807	0.0518633	0.048793	0.0459484	0.0433101	0.0408606	0.0385843	0.0364666	0.0344948	0.032657	0.0309426	0.0293417	0.0278456	0.0264463	0.0251362	0.0239088	0.0227578	0.0216777	0.0206632	0.0197097	0.0188129	0.0179686	0.0171733	0.0164236	0.0157164	0.0150488	0.0144182	0.0138221	0.0132583	0.0127247	0.0122193	0.0117404	0.0112864	0.0108555
	9.73033	0.151355	0.139909	0.129504	0.120033	0.111399	0.103517	0.0963124	0.0897171	0.0836721	0.0781243	0.0730265	0.0683364	0.0640162	0.0600322	0.0563539	0.0529541	0.0498082	0.0468942	0.0441922	0.041684	0.0393536	0.0371862	0.0351684	0.0332881	0.0315344	0.0298972	0.0283674	0.0269368	0.0255977	0.0243434	0.0231674	0.0220639	0.0210277	0.020054	0.0191383	0.0182764	0.0174646	0.0166995	0.0159779	0.0152968	0.0146536	0.0140456	0.0134707	0.0129266	0.0124114	0.0119233	0.0114606	0.0110216
	9.76041	0.155141	0.143368	0.13267	0.122934	0.114061	0.105963	0.0985619	0.0917892	0.0855831	0.0798888	0.0746577	0.0698461	0.065415	0.0613297	0.0575587	0.054074	0.0508504	0.0478649	0.0450973	0.0425288	0.0401428	0.0379241	0.035859	0.033935	0.0321409	0.0304663	0.0289019	0.0274392	0.0260704	0.0247883	0.0235866	0.0224592	0.0214008	0.0204062	0.0194711	0.0185912	0.0177625	0.0169816	0.0162452	0.0155503	0.0148941	0.014274	0.0136877	0.0131329	0.0126077	0.0121101	0.0116384	0.011191
	9.79052	0.159043	0.146933	0.135931	0.125921	0.116801	0.10848	0.100877	0.093921	0.0875486	0.0817033	0.0763347	0.0713978	0.0668525	0.0626627	0.0587962	0.0552241	0.0519203	0.0488613	0.0460261	0.0433955	0.0409522	0.0386808	0.0365671	0.0345982	0.0327625	0.0310495	0.0294496	0.0279538	0.0265544	0.0252439	0.0240158	0.0228638	0.0217825	0.0207667	0.0198117	0.0189131	0.0180672	0.0172701	0.0165185	0.0158094	0.0151399	0.0145074	0.0139094	0.0133436	0.0128081	0.0123008	0.01182	0.0113641
	9.82065	0.163066	0.150607	0.139291	0.128998	0.119623	0.111071	0.10326	0.0961146	0.0895707	0.0835695	0.078059	0.0729929	0.0683298	0.0640324	0.0600675	0.0564053	0.053019	0.0498842	0.0469794	0.0442848	0.0417827	0.039457	0.0372932	0.0352781	0.0333998	0.0316473	0.0300107	0.0284811	0.0270502	0.0257105	0.0244552	0.023278	0.0221732	0.0211355	0.0201601	0.0192425	0.0183788	0.0175651	0.016798	0.0160743	0.0153912	0.0147459	0.0141359	0.0135589	0.0130128	0.0124956	0.0120055	0.0115408
	9.8508	0.167214	0.154394	0.142753	0.132168	0.122529	0.113739	0.105712	0.0983722	0.0916512	0.0854891	0.0798323	0.074633	0.0698483	0.0654399	0.0613736	0.0576186	0.0541472	0.0509345	0.047958	0.0451975	0.0426348	0.0402533	0.038038	0.0359754	0.0340531	0.03226	0.0305858	0.0290213	0.0275581	0.0261884	0.0249053	0.0237022	0.0225732	0.021513	0.0205167	0.0195796	0.0186975	0.0178668	0.0170838	0.0163452	0.0156481	0.0149897	0.0143674	0.0137789	0.013222	0.0126946	0.0121949	0.0117212
	9.88098	0.171492	0.158298	0.146322	0.135435	0.125523	0.116487	0.108238	0.100696	0.0937921	0.087464	0.0816562	0.0763194	0.0714093	0.0668866	0.0627157	0.0588651	0.055306	0.0520129	0.0489626	0.0461344	0.0435092	0.0410702	0.038802	0.0366904	0.034723	0.032888	0.0311752	0.0295749	0.0280785	0.026678	0.0253662	0.0241364	0.0229827	0.0218994	0.0208816	0.0199244	0.0190237	0.0181754	0.017376	0.0166221	0.0159107	0.0152389	0.014604	0.0140037	0.0134357	0.0128979	0.0123884	0.0119055
	9.91118	0.175904	0.162324	0.15	0.138801	0.128608	0.119318	0.110838	0.103088	0.0959954	0.0894959	0.0835324	0.0780537	0.0730144	0.0683736	0.064095	0.0601457	0.0564963	0.0531204	0.0499941	0.047096	0.0444067	0.0419085	0.0395857	0.0374238	0.0354099	0.033532	0.0317794	0.0301423	0.0286117	0.0271795	0.0258383	0.0245812	0.023402	0.022295	0.0212551	0.0202773	0.0193573	0.0184911	0.017675	0.0169054	0.0161792	0.0154936	0.0148459	0.0142334	0.013654	0.0131056	0.0125861	0.0120937
	9.9414	0.180455	0.166475	0.153793	0.14227	0.131786	0.122233	0.113516	0.105551	0.0982634	0.091587	0.0854626	0.0798375	0.0746648	0.0699024	0.0655126	0.0614617	0.0577192	0.054258	0.0510534	0.0480834	0.0453278	0.0427688	0.0403898	0.0381762	0.0361144	0.0341923	0.0323988	0.0307238	0.0291581	0.0276934	0.0263219	0.0250367	0.0238313	0.0227	0.0216374	0.0206385	0.0196988	0.0188142	0.0179808	0.0171951	0.0164539	0.0157541	0.0150931	0.0144683	0.0138772	0.0133178	0.012788	0.0122859
	9.97164	0.18515	0.170757	0.157704	0.145847	0.135062	0.125237	0.116274	0.108087	0.100598	0.0937391	0.0874487	0.0816726	0.0763623	0.0714744	0.0669699	0.0628142	0.0589758	0.0554266	0.0521413	0.0490972	0.0462735	0.0436517	0.041215	0.038948	0.0368371	0.0348695	0.0330339	0.03132	0.0297182	0.0282199	0.0268173	0.0255033	0.0242711	0.0231148	0.0220288	0.0210082	0.0200483	0.0191447	0.0182936	0.0174914	0.0167347	0.0160205	0.0153459	0.0147083	0.0141053	0.0135347	0.0129943	0.0124824
	10.0019	0.189995	0.175174	0.161737	0.149534	0.138438	0.128332	0.119116	0.110699	0.103002	0.0959545	0.0894927	0.0835606	0.0781083	0.0730909	0.0684682	0.0642044	0.060267	0.0566272	0.0532588	0.0501383	0.0472444	0.0445581	0.0420618	0.03974	0.0375784	0.035564	0.0336852	0.0319312	0.0302922	0.0287596	0.027325	0.0259813	0.0247215	0.0235395	0.0224296	0.0213867	0.0204059	0.019483	0.0186137	0.0177945	0.017022	0.0162929	0.0156044	0.0149537	0.0143385	0.0137563	0.0132052	0.012683
	10.0322	0.194995	0.179732	0.165896	0.153337	0.141918	0.131522	0.122044	0.11339	0.105478	0.0982353	0.0915964	0.0855034	0.0799046	0.0747535	0.0700088	0.0656335	0.0615942	0.0578609	0.0544068	0.0512076	0.0482415	0.0454886	0.0429311	0.0405528	0.038339	0.0362765	0.0343531	0.0325579	0.0308808	0.0293127	0.0278453	0.026471	0.0251829	0.0239745	0.02284	0.0217742	0.0207721	0.0198292	0.0189413	0.0181047	0.0173159	0.0165715	0.0158687	0.0152047	0.0145768	0.0139829	0.0134207	0.0128881
	10.0625	0.200157	0.184434	0.170188	0.157258	0.145507	0.13481	0.125061	0.116162	0.108028	0.100584	0.0937621	0.0875029	0.0817527	0.0764637	0.0715932	0.0671029	0.0629584	0.0591288	0.0555863	0.0523061	0.0492654	0.046444	0.0438234	0.0413869	0.0391195	0.0370074	0.0350382	0.0332006	0.0314842	0.0298797	0.0283786	0.0269729	0.0256556	0.02442	0.0232604	0.022171	0.0211469	0.0201835	0.0192766	0.0184221	0.0176165	0.0168565	0.016139	0.0154612	0.0148205	0.0142145	0.0136409	0.0130976
	10.0928	0.205485	0.189288	0.174615	0.161303	0.149207	0.1382	0.12817	0.119017	0.110654	0.103002	0.0959917	0.0895609	0.0836545	0.0782232	0.0732229	0.0686139	0.0643608	0.0604319	0.0567984	0.0534346	0.0503172	0.0474251	0.0447395	0.0422431	0.0399205	0.0377574	0.035741	0.0338597	0.032103	0.030461	0.0289251	0.0274872	0.0261399	0.0248765	0.0236909	0.0225774	0.0215308	0.0205463	0.0196197	0.0187469	0.0179241	0.0171481	0.0164156	0.0157237	0.0150697	0.0144513	0.013866	0.0133118
	10.1232	0.210987	0.194298	0.179184	0.165476	0.153023	0.141695	0.131375	0.121961	0.11336	0.105493	0.0982877	0.0916796	0.0856119	0.0800337	0.0748993	0.0701679	0.0658029	0.0617715	0.0580441	0.0545942	0.0513976	0.0484328	0.0456802	0.0431222	0.0407426	0.038527	0.0364621	0.0345359	0.0327376	0.0310571	0.0294855	0.0280144	0.0266363	0.0253442	0.0241319	0.0229936	0.0219238	0.0209178	0.019971	0.0190793	0.0182389	0.0174464	0.0166984	0.0159921	0.0153246	0.0146934	0.0140962	0.0135307
	10.1536	0.216668	0.199471	0.1839	0.169782	0.15696	0.145299	0.13468	0.124994	0.116148	0.108059	0.100652	0.093861	0.0876268	0.0818968	0.076624	0.0717663	0.0672859	0.0631488	0.0593246	0.0557858	0.0525077	0.0494679	0.0466464	0.0440247	0.0415866	0.0393168	0.0372019	0.0352296	0.0333885	0.0316684	0.03006	0.0285548	0.027145	0.0258235	0.0245838	0.0234199	0.0223263	0.0212981	0.0203306	0.0194196	0.0185611	0.0177516	0.0169878	0.0162666	0.0155852	0.014941	0.0143315	0.0137545
	10.184	0.222537	0.204811	0.188768	0.174225	0.161021	0.149017	0.138087	0.128121	0.119022	0.110703	0.103088	0.0961074	0.0897011	0.0838145	0.0783988	0.0734108	0.0688112	0.064565	0.060641	0.0570106	0.0536484	0.0505313	0.0476387	0.0449516	0.042453	0.0401276	0.0379613	0.0359413	0.0340562	0.0322953	0.0306491	0.0291089	0.0276665	0.0263147	0.0250468	0.0238566	0.0227386	0.0216876	0.0206988	0.0197679	0.0188909	0.018064	0.017284	0.0165475	0.0158518	0.0151942	0.0145721	0.0139834
	10.2144	0.228599	0.210327	0.193794	0.178811	0.165212	0.152852	0.141601	0.131345	0.121984	0.113428	0.105597	0.098421	0.0918369	0.0857885	0.0802254	0.0751027	0.0703801	0.0660215	0.0619944	0.0582696	0.0548207	0.051624	0.048658	0.0459035	0.0433427	0.0409599	0.0387406	0.0366717	0.0347413	0.0329384	0.0312533	0.029677	0.0282011	0.0268181	0.0255213	0.0243041	0.023161	0.0220866	0.0210759	0.0201246	0.0192285	0.0183838	0.017587	0.0168349	0.0161246	0.0154532	0.0148182	0.0142173
	10.2448	0.234863	0.216025	0.198984	0.183545	0.169537	0.156808	0.145225	0.134669	0.125037	0.116235	0.108182	0.100804	0.0940365	0.0878209	0.0821055	0.0768438	0.0719943	0.0675196	0.0633862	0.0595639	0.0560256	0.0527468	0.0497053	0.0468812	0.0442564	0.0418145	0.0395407	0.0374213	0.0354442	0.0335982	0.0318731	0.0302596	0.0287492	0.0273342	0.0260075	0.0247627	0.0235938	0.0224952	0.0214621	0.0204898	0.0195741	0.0187111	0.0178972	0.017129	0.0164036	0.0157181	0.0150699	0.0144566
	10.2753	0.241336	0.221911	0.204344	0.188434	0.174002	0.160891	0.148964	0.138098	0.128185	0.11913	0.110846	0.103259	0.096302	0.0899137	0.084041	0.0786359	0.0736553	0.0690608	0.0648177	0.0608949	0.0572643	0.0539008	0.0507815	0.0478857	0.0451949	0.0426921	0.040362	0.0381908	0.0361656	0.0342751	0.0325088	0.0308571	0.0293112	0.0278633	0.026506	0.0252327	0.0240372	0.0229139	0.0218577	0.0208639	0.019928	0.0190462	0.0182146	0.01743	0.0166892	0.0159892	0.0153274	0.0147013
	10.3058	0.248026	0.227992	0.209881	0.193481	0.17861	0.165105	0.152822	0.141635	0.131431	0.122113	0.113592	0.105789	0.0986358	0.0920691	0.0860339	0.0804805	0.0753646	0.0706464	0.0662901	0.0622636	0.0585379	0.0550871	0.0518874	0.0489178	0.046159	0.0435934	0.0412054	0.0389807	0.0369061	0.0349698	0.0331611	0.03147	0.0298877	0.0284059	0.027017	0.0257144	0.0244916	0.0233429	0.0222629	0.021247	0.0202904	0.0193893	0.0185396	0.0177381	0.0169814	0.0162665	0.0155908	0.0149516
	10.3363	0.254942	0.234277	0.215601	0.198695	0.183369	0.169454	0.156803	0.145283	0.13478	0.12519	0.116422	0.108397	0.10104	0.0942892	0.088086	0.0823796	0.077124	0.0722781	0.0678049	0.0636714	0.0598476	0.0563066	0.0530242	0.0499784	0.0471494	0.0445192	0.0420716	0.0397917	0.0376661	0.0356827	0.0338303	0.0320988	0.0304789	0.0289622	0.027541	0.0262082	0.0249573	0.0237824	0.0226781	0.0216394	0.0206616	0.0197406	0.0188724	0.0180534	0.0172804	0.0165503	0.0158603	0.0152077
	10.3669	0.262093	0.240774	0.221511	0.204081	0.188283	0.173945	0.160912	0.149048	0.138234	0.128363	0.119341	0.111084	0.103518	0.0965763	0.0901997	0.0843351	0.0789351	0.0739573	0.0693636	0.0651196	0.0611945	0.0575606	0.0541928	0.0510685	0.0481671	0.0454703	0.0429612	0.0406245	0.0384465	0.0364145	0.0345172	0.032744	0.0310855	0.0295329	0.0280783	0.0267145	0.0254347	0.024233	0.0231036	0.0220415	0.0210418	0.0201004	0.0192131	0.0183763	0.0175866	0.0168408	0.016136	0.0154696
	10.3974	0.269488	0.24749	0.22762	0.209645	0.193359	0.178582	0.165153	0.152933	0.141797	0.131635	0.12235	0.113854	0.106072	0.0989329	0.0923769	0.0863489	0.0807999	0.0756859	0.0709676	0.0666096	0.06258	0.0588502	0.0553943	0.0521889	0.049213	0.0464475	0.043875	0.0414799	0.0392478	0.0371658	0.0352222	0.0334061	0.0317078	0.0301182	0.0286294	0.0272336	0.0259242	0.0246948	0.0235396	0.0224534	0.0214313	0.0204689	0.019562	0.0187069	0.0179	0.0171381	0.0164182	0.0157377
	10.428	0.277136	0.254434	0.233934	0.215395	0.198603	0.18337	0.169532	0.156943	0.145474	0.135011	0.125453	0.116711	0.108704	0.101361	0.0946201	0.0884232	0.0827201	0.0774655	0.0726185	0.0681428	0.0640053	0.0601765	0.0566297	0.0533408	0.0502881	0.0474517	0.0448139	0.0423584	0.0400707	0.0379372	0.0359459	0.0340856	0.0323463	0.0307188	0.0291946	0.027766	0.026426	0.0251681	0.0239865	0.0228756	0.0218304	0.0208464	0.0199194	0.0190454	0.0182209	0.0174424	0.0167071	0.016012
	10.4586	0.285048	0.261615	0.240462	0.221338	0.204021	0.188317	0.174055	0.161083	0.149269	0.138495	0.128655	0.119656	0.111418	0.103864	0.0969315	0.09056	0.0846978	0.0792978	0.074318	0.0697207	0.0654719	0.0615409	0.0579004	0.0545253	0.0513932	0.0484838	0.0457786	0.043261	0.0409159	0.0387293	0.0366889	0.0347831	0.0330016	0.031335	0.0297744	0.0283121	0.0269406	0.0256535	0.0244446	0.0233082	0.0222394	0.0212332	0.0202855	0.0193921	0.0185494	0.017754	0.0170028	0.0162928
	10.4892	0.293235	0.269043	0.247212	0.227481	0.20962	0.193427	0.178725	0.165358	0.153187	0.142089	0.131957	0.122695	0.114216	0.106445	0.0993136	0.0927617	0.0867349	0.0811848	0.0760678	0.0713449	0.0669811	0.0629447	0.0592073	0.0557433	0.0525294	0.0495447	0.0467701	0.0441884	0.0417841	0.0395428	0.0374518	0.0354992	0.0336743	0.0319673	0.0303693	0.0288722	0.0274684	0.0261512	0.0249142	0.0237518	0.0226585	0.0216296	0.0206605	0.0197473	0.018886	0.0180731	0.0173055	0.0165802
	10.5199	0.301706	0.276727	0.254193	0.233832	0.215407	0.198707	0.18355	0.169772	0.157231	0.145799	0.135365	0.125829	0.117102	0.109105	0.101769	0.0950305	0.0888336	0.0831283	0.0778695	0.073017	0.0685344	0.0643891	0.0605519	0.0569961	0.0536978	0.0506353	0.0477891	0.0451414	0.0426761	0.0403785	0.0382353	0.0362344	0.0343647	0.0326163	0.0309798	0.0294469	0.0280098	0.0266616	0.0253958	0.0242064	0.0230881	0.0220357	0.0210448	0.0201111	0.0192306	0.0183999	0.0176155	0.0168744
	10.5505	0.310475	0.284678	0.261414	0.2404	0.221389	0.204165	0.188535	0.174332	0.161407	0.149629	0.138882	0.129062	0.120078	0.111848	0.1043	0.0973688	0.0909962	0.0851304	0.0797251	0.0747386	0.0701334	0.0658757	0.0619353	0.0582848	0.0548994	0.0517567	0.0488367	0.0461209	0.0435927	0.041237	0.03904	0.0369894	0.0350737	0.0332825	0.0316063	0.0300365	0.0285652	0.0271851	0.0258896	0.0246726	0.0235284	0.022452	0.0214386	0.0204838	0.0195837	0.0187345	0.0179329	0.0171756
	10.5812	0.319552	0.292907	0.268885	0.247193	0.227575	0.209805	0.193686	0.179042	0.16572	0.153583	0.142512	0.132399	0.123149	0.114678	0.10691	0.0997793	0.0932248	0.0871933	0.0816365	0.0765116	0.0717796	0.0674059	0.063359	0.0596106	0.0561353	0.05291	0.0499137	0.0471277	0.0445346	0.042119	0.0398667	0.0377648	0.0358016	0.0339664	0.0322494	0.0306417	0.0291351	0.0277222	0.0263961	0.0251506	0.0239799	0.0228787	0.0218422	0.0208658	0.0199455	0.0190773	0.018258	0.0174841
	10.612	0.328951	0.301425	0.276616	0.25422	0.233972	0.215637	0.199009	0.183909	0.170175	0.157667	0.14626	0.135843	0.126317	0.117596	0.109602	0.102264	0.095522	0.089319	0.0836057	0.0783377	0.0734748	0.0689811	0.0648242	0.0609749	0.0574068	0.0540961	0.0510213	0.0481627	0.0455028	0.0430255	0.0407161	0.0385613	0.0365492	0.0346686	0.0329095	0.0312627	0.0297199	0.0282732	0.0269157	0.0256409	0.0244429	0.0233162	0.0222559	0.0212573	0.0203161	0.0194285	0.0185909	0.0178
	10.6427	0.338684	0.310243	0.284617	0.261491	0.240589	0.221667	0.204513	0.188938	0.174777	0.161884	0.150129	0.139397	0.129587	0.120608	0.112378	0.104827	0.0978901	0.0915098	0.0856347	0.0802188	0.0752206	0.0706031	0.0663326	0.062379	0.0587151	0.0553163	0.0521603	0.049227	0.0464981	0.0439571	0.0415888	0.0393796	0.0373171	0.0353898	0.0335873	0.0319003	0.03032	0.0288386	0.0274487	0.0261438	0.0249177	0.0237648	0.02268	0.0216585	0.020696	0.0197884	0.0189321	0.0181236
	10.6735	0.348766	0.319374	0.292899	0.269015	0.247434	0.227903	0.210203	0.194137	0.179533	0.166241	0.154125	0.143068	0.132962	0.123715	0.115242	0.10747	0.100332	0.0937681	0.0877257	0.0821569	0.0770189	0.0722734	0.0678855	0.0638243	0.0600615	0.0565717	0.053332	0.0503215	0.0475215	0.0449147	0.0424858	0.0402205	0.0381059	0.0361304	0.0342833	0.0325549	0.0309361	0.0294188	0.0279956	0.0266597	0.0254046	0.0242248	0.0231148	0.0220698	0.0210853	0.0201571	0.0192816	0.018455
	10.7042	0.359211	0.32883	0.301474	0.276802	0.254516	0.234354	0.216087	0.199511	0.184448	0.170742	0.158253	0.146857	0.136446	0.126921	0.118197	0.110196	0.10285	0.0960964	0.089881	0.0841541	0.0788716	0.0739937	0.0694846	0.0653121	0.0614472	0.0578635	0.0545373	0.0514473	0.0485738	0.0458993	0.0434077	0.0410845	0.0389164	0.0368913	0.0349982	0.033227	0.0315685	0.0300144	0.0285569	0.027189	0.0259042	0.0246966	0.0235607	0.0224915	0.0214844	0.0205351	0.0196397	0.0187946
	10.735	0.370034	0.338626	0.310354	0.284864	0.261846	0.241028	0.222172	0.205067	0.189529	0.175394	0.162517	0.150772	0.140043	0.130231	0.121247	0.113009	0.105447	0.0984973	0.0921028	0.0862125	0.0807805	0.0757659	0.0711315	0.0668441	0.0628736	0.0591929	0.0557775	0.0526053	0.0496561	0.0469117	0.0443555	0.0419726	0.0397492	0.037673	0.0357324	0.0339172	0.0322179	0.0306257	0.0291329	0.0277321	0.0264167	0.0251805	0.024018	0.0229239	0.0218935	0.0209225	0.0200067	0.0191426
	10.7659	0.381252	0.348775	0.319551	0.293211	0.269433	0.247934	0.228467	0.210814	0.194782	0.180202	0.166924	0.154815	0.143758	0.133649	0.124394	0.115911	0.108126	0.100973	0.0943937	0.0883343	0.0827478	0.0775918	0.0728279	0.0684217	0.0643422	0.0605614	0.0570539	0.0537968	0.0507694	0.0479528	0.04533	0.0428855	0.0406052	0.0384761	0.0364867	0.0346261	0.0328847	0.0312534	0.0297242	0.0282896	0.0269426	0.025677	0.024487	0.0233673	0.022313	0.0213196	0.0203829	0.0194992
	10.7967	0.392879	0.359292	0.329079	0.301855	0.277288	0.255082	0.234981	0.216758	0.200213	0.185172	0.171477	0.158992	0.147595	0.137178	0.127643	0.118906	0.110891	0.103527	0.0967561	0.0905218	0.0847755	0.0794733	0.0745755	0.0700466	0.0658545	0.0619702	0.0583675	0.0550228	0.0519147	0.0490237	0.0463322	0.0438241	0.041485	0.0393016	0.0372617	0.0353544	0.0335695	0.031898	0.0303313	0.0288617	0.0274823	0.0261864	0.0249682	0.0238221	0.0227432	0.0217268	0.0207686	0.0198647
	10.8276	0.404935	0.370193	0.338951	0.310809	0.285421	0.262481	0.241722	0.222907	0.205831	0.19031	0.176184	0.163309	0.151559	0.140822	0.130998	0.121998	0.113743	0.106162	0.0991928	0.0927775	0.0868659	0.0814125	0.0763763	0.0717205	0.067412	0.0634208	0.0597198	0.0562847	0.0530932	0.0501253	0.0473628	0.0447893	0.0423895	0.04015	0.0380581	0.0361026	0.034273	0.0325599	0.0309546	0.0294491	0.0280362	0.0267092	0.0254619	0.0242887	0.0231844	0.0221443	0.021164	0.0202393
	10.8585	0.417437	0.381493	0.349181	0.320086	0.293845	0.270142	0.248698	0.22927	0.211642	0.195625	0.18105	0.167771	0.155655	0.144587	0.134463	0.12519	0.116688	0.108881	0.101706	0.0951038	0.0890212	0.0834114	0.0782321	0.0734452	0.0690164	0.0649147	0.0611121	0.0575835	0.054306	0.0512588	0.0484231	0.0457819	0.0433196	0.0410222	0.0388767	0.0368715	0.0349958	0.0332399	0.0315947	0.0300522	0.0286049	0.0272457	0.0259685	0.0247674	0.023637	0.0225725	0.0215694	0.0206234
	10.8894	0.430404	0.393211	0.359786	0.329698	0.302571	0.278075	0.255921	0.235855	0.217654	0.201121	0.186082	0.172383	0.159888	0.148476	0.138041	0.128486	0.119727	0.111688	0.1043	0.0975035	0.0912439	0.0854723	0.0801449	0.0752224	0.0706692	0.0664533	0.0625459	0.0589207	0.0555543	0.0524251	0.0495139	0.0468028	0.044276	0.0419189	0.0397181	0.0376617	0.0357384	0.0339384	0.0322522	0.0306716	0.0291887	0.0277965	0.0264884	0.0252585	0.0241013	0.0230118	0.0219852	0.0210173
	10.9203	0.443856	0.405362	0.37078	0.339661	0.311612	0.286292	0.2634	0.242672	0.223876	0.206807	0.191286	0.177151	0.164263	0.152496	0.141738	0.13189	0.122865	0.114584	0.106976	0.0999792	0.0935364	0.0875974	0.0821169	0.0770541	0.0723723	0.0680384	0.0640225	0.0602977	0.0568394	0.0536256	0.0506363	0.0478532	0.0452598	0.042841	0.0405832	0.0384739	0.0365016	0.034656	0.0329276	0.0313077	0.0297882	0.0283619	0.0270221	0.0257626	0.0245778	0.0234624	0.0224117	0.0214212
	10.9513	0.457815	0.417967	0.382181	0.349988	0.320981	0.294805	0.271146	0.24973	0.230315	0.212691	0.196668	0.182082	0.168786	0.156649	0.145557	0.135407	0.126106	0.117575	0.109739	0.102534	0.0959014	0.0897892	0.0841502	0.0789424	0.0741276	0.0696716	0.0655436	0.0617157	0.0581625	0.0548614	0.0517914	0.0489339	0.0462717	0.0437894	0.0414727	0.0393089	0.037286	0.0353935	0.0336215	0.0319611	0.0304039	0.0289425	0.02757	0.02628	0.0250667	0.0239247	0.0228492	0.0218354
	10.9823	0.472302	0.431045	0.394005	0.360695	0.330692	0.303625	0.279169	0.257038	0.236982	0.21878	0.202238	0.187183	0.173463	0.160943	0.149504	0.139039	0.129454	0.120662	0.11259	0.10517	0.0983416	0.09205	0.0862471	0.0808891	0.0759368	0.0713546	0.0671108	0.0631763	0.0595251	0.0561336	0.0529804	0.050046	0.0473129	0.0447649	0.0423875	0.0401674	0.0380924	0.0361515	0.0343346	0.0326323	0.0310363	0.0295387	0.0281325	0.0268111	0.0255685	0.0243992	0.023298	0.0222604
	11.0133	0.487341	0.444616	0.406271	0.371799	0.34076	0.312766	0.287481	0.264607	0.243884	0.225083	0.208001	0.192459	0.1783	0.165383	0.153584	0.142793	0.132912	0.123851	0.115535	0.107892	0.10086	0.0943826	0.0884099	0.0828966	0.077802	0.0730893	0.0687256	0.064681	0.0609285	0.0574437	0.0542045	0.0511907	0.0483843	0.0457686	0.0433285	0.0410503	0.0389215	0.0369307	0.0350674	0.0333221	0.031686	0.0301512	0.0287102	0.0273564	0.0260836	0.0248861	0.0237586	0.0226963
	11.0443	0.502955	0.458702	0.418998	0.383317	0.351199	0.322242	0.296095	0.272449	0.251033	0.231608	0.213966	0.197919	0.183303	0.169974	0.157802	0.146673	0.136485	0.127146	0.118576	0.110702	0.103459	0.0967895	0.0906411	0.0849671	0.0797252	0.0748775	0.0703899	0.0662314	0.0623742	0.058793	0.0554649	0.0523691	0.049487	0.0468013	0.0442965	0.0419584	0.0397741	0.0377317	0.0358206	0.0340309	0.0323535	0.0307803	0.0293035	0.0279164	0.0266125	0.0253859	0.0242313	0.0231437
	11.0754	0.51917	0.473325	0.432207	0.395266	0.362026	0.332067	0.305023	0.280574	0.258437	0.238366	0.22014	0.203569	0.18848	0.174723	0.162164	0.150684	0.140177	0.130549	0.121716	0.113603	0.106142	0.0992736	0.0929434	0.0871029	0.0817086	0.0767213	0.0721055	0.0678292	0.0638637	0.0601828	0.0567628	0.0535824	0.0506221	0.0478641	0.0452925	0.0428925	0.0406509	0.0385554	0.036595	0.0347595	0.0330395	0.0314266	0.029913	0.0284915	0.0271555	0.025899	0.0247165	0.0236028
	11.1064	0.536013	0.488509	0.445917	0.407666	0.373257	0.342255	0.314278	0.288994	0.266108	0.245364	0.226534	0.209417	0.193836	0.179635	0.166674	0.15483	0.143994	0.134066	0.124961	0.116599	0.108913	0.101838	0.0953192	0.0893065	0.0837545	0.0786226	0.0738741	0.0694761	0.0653986	0.0616146	0.0580998	0.0548318	0.0517907	0.0489581	0.0463175	0.0438536	0.0415528	0.0394025	0.0373912	0.0355084	0.0337445	0.0320908	0.0305392	0.0290822	0.0277132	0.0264259	0.0252146	0.024074
	11.1375	0.553512	0.504279	0.460152	0.420535	0.38491	0.352822	0.323875	0.297722	0.274058	0.252614	0.233155	0.215472	0.19938	0.184718	0.17134	0.159119	0.14794	0.137701	0.128313	0.119695	0.111774	0.104485	0.0977716	0.0915804	0.0858651	0.0805836	0.0756979	0.0711739	0.0669806	0.06309	0.059477	0.0561186	0.052994	0.0500843	0.0473724	0.0448426	0.0424808	0.0402739	0.03821	0.0362785	0.0344693	0.0327734	0.0311826	0.0296891	0.028286	0.026967	0.025726	0.0245577
	11.1687	0.571696	0.520661	0.474934	0.433895	0.397002	0.363784	0.333828	0.306771	0.282297	0.260126	0.240013	0.221742	0.20512	0.189978	0.176167	0.163554	0.15202	0.141459	0.131778	0.122893	0.114729	0.107219	0.100303	0.0939274	0.088043	0.0826066	0.0775789	0.0729245	0.0686113	0.0646106	0.0608961	0.0574442	0.0542333	0.051244	0.0484584	0.0458605	0.0434356	0.0411702	0.0390522	0.0370703	0.0352144	0.0334751	0.0318438	0.0303127	0.0288745	0.0275227	0.0262512	0.0250543
	11.1998	0.590597	0.537682	0.490288	0.447767	0.409555	0.37516	0.344152	0.316155	0.290838	0.267911	0.247119	0.228235	0.211062	0.195423	0.181163	0.168142	0.156239	0.145344	0.135359	0.126198	0.117782	0.110043	0.102917	0.0963501	0.0902906	0.0846939	0.0795191	0.0747298	0.0702927	0.066178	0.0623585	0.0588099	0.0555099	0.0524382	0.0495766	0.0469083	0.0444183	0.0420926	0.0399186	0.0378848	0.0359806	0.0341964	0.0325234	0.0309535	0.0294791	0.0280936	0.0267905	0.0255643
	11.231	0.610246	0.555372	0.506239	0.462173	0.422587	0.386966	0.354864	0.325888	0.299695	0.275981	0.254482	0.234963	0.217216	0.201061	0.186333	0.17289	0.160604	0.149362	0.139062	0.129614	0.120937	0.11296	0.105617	0.0988516	0.0926107	0.0868479	0.0815209	0.0765919	0.0720265	0.0677939	0.0638659	0.0602173	0.056825	0.0536682	0.050728	0.0479871	0.0454297	0.0430417	0.04081	0.0387226	0.0367686	0.0349382	0.0332221	0.0316121	0.0301004	0.0286801	0.0273446	0.026088
	11.2621	0.630678	0.57376	0.522815	0.477139	0.43612	0.399222	0.365981	0.335986	0.308879	0.284347	0.262113	0.241933	0.223591	0.206898	0.191686	0.177804	0.16512	0.153518	0.14289	0.133145	0.124197	0.115974	0.108406	0.101435	0.095006	0.0890711	0.0835865	0.0785129	0.0738148	0.0694601	0.0654198	0.0616678	0.0581802	0.0549354	0.0519139	0.0490979	0.0464711	0.0440187	0.0417273	0.0395845	0.0375792	0.035701	0.0339405	0.0322892	0.030739	0.0292828	0.0279138	0.026626
	11.2933	0.651929	0.592878	0.540042	0.492688	0.450176	0.411948	0.377519	0.346463	0.318407	0.293023	0.270024	0.249156	0.230196	0.212944	0.197228	0.18289	0.169794	0.157817	0.14685	0.136796	0.127568	0.119088	0.111287	0.104103	0.0974794	0.0913663	0.0857184	0.0804951	0.0756595	0.0711785	0.067022	0.063163	0.0595768	0.0562411	0.0531356	0.0502419	0.0475433	0.0450244	0.0426713	0.0404714	0.0384131	0.0364856	0.0346793	0.0329853	0.0313954	0.0299022	0.0284987	0.0271787
	11.3246	0.674037	0.61276	0.557952	0.508847	0.464778	0.425164	0.389498	0.357337	0.328292	0.302022	0.278228	0.256644	0.23704	0.219208	0.202967	0.188156	0.174631	0.162266	0.150946	0.140572	0.131052	0.122307	0.114264	0.106859	0.100034	0.0937361	0.0879192	0.0825407	0.0775628	0.0729511	0.0686744	0.0647047	0.0610164	0.0575866	0.0543943	0.0514204	0.0486475	0.0460599	0.0436432	0.0413843	0.0392711	0.0372927	0.0354391	0.0337012	0.0320703	0.0305389	0.0290998	0.0277466
	11.3558	0.697041	0.633441	0.576575	0.525644	0.479952	0.438893	0.401938	0.368626	0.33855	0.311358	0.286735	0.264408	0.244133	0.225698	0.208913	0.193609	0.179639	0.16687	0.155185	0.144478	0.134656	0.125635	0.117341	0.109707	0.102673	0.0961836	0.0901913	0.0846523	0.079527	0.0747799	0.0703787	0.0662944	0.0625007	0.0589735	0.0556914	0.0526345	0.0497848	0.0471262	0.0446438	0.0423239	0.0401541	0.0381232	0.0362208	0.0344374	0.0327643	0.0311935	0.0297177	0.0283302
	11.3871	0.720984	0.654958	0.595944	0.543108	0.495723	0.453157	0.414858	0.380346	0.349199	0.321045	0.29556	0.272458	0.251487	0.232424	0.215072	0.199257	0.184824	0.171636	0.159571	0.148518	0.138383	0.129077	0.120522	0.112651	0.105399	0.0987116	0.0925378	0.0868323	0.0815543	0.076667	0.0721369	0.0679341	0.0640311	0.0604033	0.0570282	0.0538855	0.0509566	0.0482246	0.0456741	0.0432912	0.041063	0.0389779	0.037025	0.0351947	0.033478	0.0318666	0.0303529	0.0289301
	11.4184	0.745908	0.67735	0.616094	0.561269	0.512118	0.46798	0.428281	0.392519	0.360253	0.331099	0.304716	0.280809	0.259112	0.239396	0.221456	0.205109	0.190195	0.176571	0.16411	0.1527	0.142238	0.132636	0.123811	0.115693	0.108217	0.101323	0.0949613	0.0890833	0.0836472	0.0786146	0.0739512	0.0696255	0.0656095	0.0618776	0.0584064	0.0551749	0.0521639	0.049356	0.0467353	0.0442873	0.0419987	0.0398575	0.0378526	0.0359739	0.0342121	0.0325588	0.031006	0.0295467
	11.4497	0.771862	0.700657	0.63706	0.58016	0.529165	0.483388	0.442229	0.405164	0.371733	0.341536	0.314219	0.289472	0.267021	0.246625	0.228072	0.211172	0.195758	0.181682	0.168811	0.157028	0.146228	0.136317	0.127213	0.118839	0.111129	0.104022	0.097465	0.0914082	0.0858082	0.0806252	0.0758235	0.0713708	0.0672377	0.0633979	0.0598273	0.056504	0.0534082	0.0505218	0.0478285	0.0453132	0.0429622	0.0407631	0.0387044	0.0367757	0.0349674	0.0332707	0.0316776	0.0301807
	11.481	0.798893	0.724924	0.658881	0.599814	0.546896	0.499409	0.456726	0.418302	0.383657	0.352373	0.324082	0.298461	0.275225	0.254122	0.234931	0.217456	0.201522	0.186975	0.173678	0.161508	0.150356	0.140126	0.130731	0.122092	0.114139	0.106812	0.100052	0.0938099	0.0880399	0.0827011	0.0777562	0.0731718	0.0689176	0.0649662	0.0612926	0.0578743	0.0546907	0.0517232	0.0489548	0.0463699	0.0439544	0.0416955	0.0395812	0.0376009	0.0357446	0.0340032	0.0323685	0.0308327
	11.5124	0.827052	0.750194	0.681597	0.620267	0.565341	0.516069	0.471797	0.431955	0.396044	0.363628	0.334323	0.307791	0.283737	0.261898	0.242044	0.22397	0.207495	0.192459	0.178719	0.166147	0.15463	0.144068	0.13437	0.125456	0.117252	0.109695	0.102725	0.0962912	0.0903452	0.0848447	0.0797515	0.0750307	0.0706511	0.0665841	0.0628039	0.0592873	0.0560129	0.0529615	0.0501154	0.0474586	0.0449765	0.0426557	0.040484	0.0384503	0.0365444	0.0347569	0.0330791	0.0315033
	11.5438	0.856395	0.776517	0.705251	0.641557	0.584533	0.533398	0.487468	0.446148	0.408917	0.37532	0.344957	0.317477	0.292571	0.269966	0.249421	0.230725	0.213687	0.198142	0.183941	0.170951	0.159055	0.148148	0.138137	0.128936	0.120472	0.112676	0.105489	0.0988555	0.0927268	0.0870589	0.0818119	0.0769499	0.0724402	0.0682535	0.0643631	0.0607447	0.0573763	0.054238	0.0513116	0.0485804	0.0460293	0.0436446	0.0414136	0.0393248	0.0373677	0.0355325	0.0338103	0.0321932
	11.5752	0.886978	0.803943	0.729886	0.663722	0.604509	0.551428	0.503767	0.460904	0.422296	0.387468	0.356003	0.327535	0.301741	0.278337	0.257074	0.237729	0.220107	0.204032	0.189352	0.175928	0.163638	0.152372	0.142035	0.132537	0.123802	0.115759	0.108346	0.101506	0.0951879	0.0893464	0.08394	0.0789315	0.0742872	0.0699765	0.0659718	0.0622481	0.0587825	0.0555543	0.0525447	0.0497366	0.0471143	0.0446634	0.0423711	0.0402254	0.0382152	0.0363308	0.0345628	0.0329029
	11.6066	0.918861	0.832524	0.75555	0.686805	0.625304	0.570191	0.520722	0.47625	0.436205	0.400093	0.367479	0.33798	0.311262	0.287027	0.265015	0.244995	0.226764	0.210139	0.19496	0.181084	0.168384	0.156746	0.14607	0.136264	0.127248	0.118949	0.111301	0.104246	0.0977316	0.0917099	0.0861383	0.0809781	0.0761942	0.0717551	0.0676321	0.0637992	0.0602329	0.0569117	0.0538161	0.0509284	0.0482323	0.0457132	0.0433574	0.0411528	0.039088	0.0371526	0.0353373	0.0336333
	11.638	0.952108	0.862317	0.782293	0.710849	0.646957	0.589722	0.538366	0.492212	0.450669	0.413217	0.379404	0.348832	0.321149	0.296048	0.273257	0.252534	0.233668	0.21647	0.200773	0.186427	0.173301	0.161277	0.150248	0.140122	0.130814	0.122248	0.114357	0.107079	0.100361	0.0941527	0.0884097	0.0830921	0.0781636	0.0735914	0.0693458	0.0654	0.0617294	0.0583119	0.0551273	0.0521572	0.0493848	0.046795	0.0443737	0.0421082	0.0399868	0.0379988	0.0361346	0.034385
	11.6695	0.986786	0.89338	0.810166	0.735901	0.669509	0.610056	0.556729	0.508821	0.465712	0.426863	0.3918	0.360107	0.33142	0.305416	0.281812	0.260358	0.240832	0.223037	0.2068	0.191966	0.178397	0.16597	0.154576	0.144116	0.134505	0.125662	0.117518	0.11001	0.10308	0.0966778	0.0907571	0.0852763	0.0801979	0.0754877	0.0711151	0.0670522	0.0632736	0.0597564	0.0564796	0.0534243	0.050573	0.0479101	0.0454209	0.0430925	0.0409126	0.0388703	0.0369555	0.0351588
	11.701	1.02297	0.925777	0.839224	0.762009	0.693004	0.631233	0.575847	0.526105	0.481363	0.441055	0.404687	0.371826	0.342091	0.315146	0.290696	0.268479	0.248265	0.22985	0.213051	0.197708	0.183678	0.170833	0.159058	0.148253	0.138326	0.129196	0.120789	0.113041	0.105892	0.0992885	0.0931834	0.0875334	0.0822995	0.0774464	0.0729421	0.0687579	0.0648675	0.061247	0.0578748	0.0547312	0.0517983	0.0490596	0.0465003	0.0441068	0.0418664	0.039768	0.0378008	0.0359555
	11.7325	1.06072	0.959572	0.869526	0.789224	0.717486	0.653292	0.595754	0.544097	0.497648	0.455817	0.418088	0.384009	0.35318	0.325254	0.299922	0.276911	0.255981	0.236918	0.219535	0.203663	0.189153	0.175872	0.163702	0.152537	0.142283	0.132854	0.124175	0.116177	0.1088	0.101988	0.0956919	0.0898664	0.0844712	0.0794698	0.0748291	0.0705192	0.0665128	0.0627854	0.0593143	0.0560794	0.0530619	0.0502449	0.0476131	0.0451522	0.0428493	0.0406927	0.0386716	0.036776
	11.764	1.10013	0.994835	0.901132	0.8176	0.743004	0.676276	0.616488	0.562831	0.514599	0.471178	0.432028	0.396676	0.364708	0.335758	0.309506	0.285667	0.26399	0.244254	0.226262	0.209839	0.19483	0.181097	0.168515	0.156976	0.146381	0.136642	0.127679	0.119423	0.111809	0.104781	0.0982859	0.0922782	0.0867157	0.0815606	0.0767784	0.0723382	0.0682117	0.0643734	0.0608	0.0574704	0.0543654	0.0514674	0.0487604	0.0462298	0.0438623	0.0416456	0.0395686	0.037621
	11.7956	1.14128	1.03164	0.934108	0.847194	0.769608	0.70023	0.63809	0.582341	0.532247	0.487164	0.44653	0.409851	0.376693	0.346676	0.319464	0.294762	0.272308	0.25187	0.233244	0.216247	0.200718	0.186513	0.173504	0.161576	0.150627	0.140565	0.131308	0.122783	0.114923	0.10767	0.100969	0.094772	0.089036	0.0837214	0.0787925	0.0742172	0.0699662	0.066013	0.0623336	0.058906	0.0557103	0.0527284	0.0499436	0.0473409	0.0449065	0.0426277	0.0404929	0.0384915
	11.8272	1.18425	1.07006	0.96852	0.878067	0.797351	0.725201	0.6606	0.602665	0.550625	0.503806	0.461622	0.423556	0.389157	0.358026	0.329814	0.304212	0.280946	0.259777	0.24049	0.222896	0.206826	0.192131	0.178677	0.166344	0.155026	0.144629	0.135066	0.126261	0.118147	0.110659	0.103744	0.0973513	0.0914352	0.085955	0.080874	0.0761585	0.0717785	0.0677063	0.0639169	0.0603878	0.0570982	0.0540294	0.0511641	0.0484868	0.0459831	0.04364	0.0414454	0.0393884
	11.8588	1.22914	1.11018	1.00444	0.910283	0.82629	0.751238	0.684064	0.623842	0.569767	0.521135	0.477332	0.437818	0.402122	0.369829	0.340573	0.314032	0.289921	0.26799	0.248014	0.229798	0.213164	0.197958	0.18404	0.171286	0.159586	0.148839	0.138959	0.129864	0.121483	0.113753	0.106616	0.100019	0.0939163	0.0882645	0.0830255	0.0781648	0.0736508	0.0694552	0.065552	0.0619176	0.0585308	0.0553719	0.0524233	0.0496687	0.0470933	0.0446836	0.0424272	0.0403128
	11.8904	1.27605	1.15209	1.04195	0.943907	0.856483	0.778394	0.708527	0.645914	0.589711	0.539183	0.493688	0.452662	0.415613	0.382106	0.35176	0.324239	0.299247	0.276521	0.255828	0.236963	0.219742	0.204005	0.189604	0.176412	0.164313	0.153203	0.142992	0.133595	0.124939	0.116957	0.109588	0.10278	0.0964829	0.0906527	0.0852499	0.0802385	0.0755857	0.0712621	0.0672407	0.0634973	0.0600097	0.0567576	0.0537226	0.050888	0.0482384	0.0457598	0.0434395	0.0412655
	11.922	1.32508	1.19588	1.08112	0.979011	0.887994	0.806725	0.73404	0.668924	0.610495	0.557985	0.510721	0.468116	0.429652	0.394878	0.363395	0.334852	0.30894	0.285385	0.263944	0.244403	0.226571	0.210279	0.195376	0.181728	0.169214	0.157727	0.147171	0.13746	0.128518	0.120273	0.112665	0.105637	0.0991383	0.0931231	0.0875502	0.0823823	0.0775855	0.0731291	0.0689854	0.0651289	0.0615368	0.0581881	0.0550636	0.0521462	0.0494197	0.0468698	0.0444832	0.0422478
	11.9537	1.37634	1.24164	1.12204	1.01567	0.920888	0.836289	0.760653	0.692918	0.632161	0.577578	0.528465	0.484208	0.444267	0.40817	0.375499	0.34589	0.319018	0.294597	0.272376	0.252131	0.233662	0.216793	0.201366	0.187243	0.174297	0.162417	0.151503	0.141466	0.132225	0.123708	0.115851	0.108594	0.101886	0.0956789	0.0899295	0.0845992	0.0796529	0.0750588	0.0707881	0.0668144	0.063114	0.0596651	0.056448	0.0534447	0.0506387	0.0480149	0.0455598	0.0432606
	11.9853	1.42994	1.28947	1.16481	1.05396	0.955236	0.867148	0.788422	0.717945	0.654752	0.598	0.546953	0.50097	0.459485	0.422005	0.388094	0.357371	0.329497	0.304175	0.28114	0.260159	0.241026	0.223555	0.207584	0.192965	0.17957	0.167281	0.155995	0.145618	0.136067	0.127267	0.11915	0.111656	0.104731	0.0983236	0.0923909	0.086892	0.0817906	0.0770537	0.0726512	0.0685559	0.0647432	0.0611905	0.0578774	0.0547851	0.0518966	0.0491964	0.0466703	0.0443051
	12.017	1.48601	1.33949	1.2095	1.09397	0.99111	0.899367	0.817404	0.744056	0.678313	0.619291	0.566222	0.518433	0.475335	0.436409	0.401203	0.369317	0.340397	0.314133	0.290249	0.268503	0.248676	0.230579	0.214039	0.198905	0.185041	0.172326	0.160652	0.149922	0.140048	0.130954	0.122568	0.114827	0.107675	0.101061	0.0949379	0.089264	0.0840016	0.0791163	0.0745771	0.0703557	0.0664265	0.0627662	0.0593535	0.056169	0.0531952	0.0504157	0.0478161	0.0453826
	12.0488	1.54468	1.39181	1.25624	1.13579	1.02859	0.933015	0.84766	0.771306	0.702892	0.641495	0.58631	0.536633	0.491846	0.451411	0.414851	0.381749	0.351738	0.324491	0.299721	0.277174	0.256626	0.237874	0.220742	0.205071	0.190719	0.177561	0.165483	0.154385	0.144176	0.134775	0.126109	0.118112	0.110725	0.103895	0.097574	0.0917183	0.0862887	0.0812495	0.0765684	0.0722162	0.0681662	0.0643942	0.0608783	0.0575982	0.0545358	0.0516744	0.0489985	0.0464943
	12.0805	1.60609	1.44655	1.30511	1.17951	1.06776	0.968166	0.879256	0.799751	0.728541	0.664657	0.607257	0.555604	0.509053	0.467038	0.429063	0.394692	0.363539	0.335266	0.309571	0.286191	0.264888	0.245455	0.227705	0.211474	0.196614	0.182994	0.170496	0.159015	0.148456	0.138736	0.129778	0.121515	0.113883	0.10683	0.100303	0.0942585	0.0886552	0.0834561	0.0786277	0.0741397	0.0699644	0.0660766	0.0624536	0.0590745	0.0559203	0.0529738	0.050219	0.0476416
	12.1123	1.67038	1.50383	1.35624	1.22522	1.1087	1.0049	0.912259	0.829453	0.755312	0.688824	0.629105	0.575385	0.526987	0.483321	0.443867	0.408169	0.375824	0.346479	0.319818	0.295567	0.273478	0.253333	0.23494	0.218125	0.202735	0.188633	0.175697	0.163817	0.152895	0.142843	0.133582	0.125041	0.117156	0.109869	0.103129	0.096888	0.0911043	0.0857392	0.0807579	0.0761289	0.0718235	0.0678156	0.0640815	0.0605997	0.0573503	0.0543156	0.0514791	0.0488257
	12.1441	1.73771	1.56379	1.40974	1.27304	1.15151	1.04329	0.946742	0.860475	0.783264	0.714047	0.6519	0.596015	0.545685	0.500292	0.459291	0.422206	0.388615	0.35815	0.330481	0.30532	0.28241	0.261523	0.242458	0.225034	0.209092	0.194489	0.181097	0.168801	0.1575	0.147103	0.137526	0.128696	0.120547	0.113018	0.106055	0.0996107	0.0936395	0.0881019	0.0829618	0.0781865	0.073746	0.0696134	0.0657641	0.0621757	0.0588277	0.0557016	0.0527803	0.0500482
	12.1759	1.80823	1.62658	1.46574	1.32307	1.19629	1.08342	0.98278	0.892884	0.812455	0.74038	0.67569	0.617538	0.565186	0.517984	0.475365	0.436829	0.401937	0.370301	0.341578	0.315467	0.2917	0.270039	0.250273	0.232215	0.215697	0.20057	0.186702	0.173974	0.162279	0.151521	0.141616	0.132486	0.124061	0.116281	0.109087	0.10243	0.0962644	0.0905476	0.0852426	0.0803152	0.0757345	0.0714725	0.0675036	0.0638046	0.0603543	0.0571334	0.0541242	0.0513106
	12.2077	1.88213	1.69235	1.52437	1.37543	1.24313	1.1254	1.02046	0.926753	0.842949	0.767878	0.700523	0.639998	0.585527	0.536434	0.492122	0.452068	0.415815	0.382955	0.353131	0.326029	0.301366	0.278896	0.258399	0.239678	0.222559	0.206887	0.192524	0.179344	0.167238	0.156106	0.145859	0.136416	0.127705	0.119662	0.112229	0.105351	0.0989828	0.0930798	0.0876034	0.0825181	0.0777918	0.0733954	0.0693024	0.0654886	0.0619321	0.0586128	0.0555125	0.0526144
	12.2395	1.95959	1.76125	1.58578	1.43025	1.29215	1.16931	1.05985	0.962156	0.874814	0.796601	0.726453	0.663441	0.606753	0.555678	0.509594	0.467953	0.430276	0.396136	0.365162	0.337023	0.311425	0.288111	0.26685	0.247438	0.229692	0.213452	0.198571	0.184921	0.172387	0.160864	0.150261	0.140492	0.131484	0.123168	0.115485	0.108378	0.101799	0.0957021	0.0900475	0.0847982	0.0799206	0.0753847	0.0711628	0.0672299	0.0635632	0.0601419	0.0569471	0.0539613
	12.2714	2.0408	1.83347	1.65011	1.48766	1.34347	1.21526	1.10106	0.999175	0.90812	0.826613	0.753537	0.687919	0.628907	0.575757	0.527818	0.484516	0.445348	0.409871	0.377694	0.348471	0.321896	0.2977	0.275641	0.255507	0.237108	0.220274	0.204854	0.190714	0.177734	0.165804	0.154829	0.144721	0.135403	0.126803	0.11886	0.111515	0.104716	0.0984184	0.0925786	0.0871587	0.0821241	0.0774432	0.0730874	0.0690309	0.0652498	0.0617226	0.0584297	0.055353
	12.3033	2.12597	1.90918	1.71753	1.5478	1.3972	1.26335	1.14418	1.03789	0.942942	0.857979	0.781833	0.713482	0.652036	0.596713	0.546831	0.50179	0.461063	0.424186	0.39075	0.360394	0.332799	0.307681	0.284789	0.263902	0.24482	0.227366	0.211384	0.196733	0.183287	0.170933	0.159571	0.14911	0.139469	0.130574	0.12236	0.114766	0.10774	0.101233	0.0952003	0.0896032	0.0844052	0.0795737	0.0750789	0.0708939	0.0669941	0.0633571	0.0599623	0.0567913
	12.3352	2.21533	1.98857	1.78819	1.61081	1.45349	1.31371	1.18931	1.0784	0.97936	0.890771	0.811404	0.740189	0.67619	0.61859	0.566672	0.51981	0.477451	0.439109	0.404357	0.372817	0.344154	0.318073	0.294311	0.272636	0.252841	0.234741	0.218173	0.202988	0.189057	0.176261	0.164496	0.153666	0.143689	0.134486	0.125989	0.118138	0.110874	0.104149	0.0979165	0.0921351	0.0867673	0.0817793	0.0771401	0.0728217	0.0687986	0.0650474	0.061547	0.058278
	12.3671	2.3091	2.07185	1.86229	1.67685	1.51245	1.36645	1.23655	1.12079	1.01746	0.925063	0.842317	0.768097	0.701421	0.641434	0.587385	0.538615	0.494547	0.454672	0.418542	0.385762	0.355983	0.328895	0.304224	0.281727	0.261187	0.242413	0.225231	0.20949	0.195052	0.181795	0.16961	0.158397	0.148068	0.138545	0.129755	0.121634	0.114124	0.107172	0.100731	0.0947582	0.0892139	0.0840632	0.0792739	0.0748169	0.0706656	0.066796	0.0631859	0.0598153
	12.399	2.40753	2.15924	1.94001	1.7461	1.57426	1.4217	1.28603	1.16517	1.05733	0.960934	0.874641	0.797268	0.727786	0.665296	0.609012	0.558243	0.512385	0.470905	0.433333	0.399257	0.36831	0.340169	0.314547	0.291191	0.269873	0.250394	0.232573	0.216251	0.201285	0.187547	0.174923	0.16331	0.152616	0.142758	0.133663	0.125262	0.117494	0.110307	0.103649	0.0974765	0.0917486	0.0864287	0.0814833	0.0768823	0.0725979	0.0686052	0.0648812	0.0614051
	12.431	2.51089	2.25096	2.02156	1.81873	1.63905	1.4796	1.33786	1.21164	1.09906	0.998468	0.908452	0.82777	0.755343	0.690228	0.631601	0.578737	0.531004	0.487842	0.448761	0.413328	0.381159	0.351917	0.325301	0.301046	0.278916	0.2587	0.240211	0.223282	0.207764	0.193525	0.180443	0.168413	0.157339	0.147133	0.137718	0.129025	0.120991	0.113557	0.106674	0.100294	0.0943751	0.0888793	0.0837717	0.0790209	0.0745982	0.0704776	0.0666353	0.0630497
	12.463	2.61946	2.34727	2.10715	1.89492	1.707	1.5403	1.39217	1.26032	1.14275	1.03775	0.943827	0.859672	0.784154	0.716286	0.655201	0.600142	0.550443	0.50552	0.464857	0.428003	0.394556	0.364161	0.336506	0.311311	0.288331	0.267346	0.248159	0.230597	0.214504	0.19974	0.186182	0.173716	0.162244	0.151676	0.141929	0.132932	0.124619	0.116929	0.109811	0.103215	0.0970975	0.0914186	0.0861423	0.0812359	0.0766694	0.0724159	0.0684507	0.0647512
	12.495	2.73354	2.44842	2.197	1.97488	1.77827	1.60395	1.4491	1.31132	1.18852	1.07889	0.980851	0.893048	0.814286	0.743528	0.679865	0.622503	0.570744	0.523974	0.481656	0.443314	0.408527	0.376927	0.348184	0.322007	0.298138	0.276349	0.256433	0.238209	0.221514	0.206204	0.192147	0.179228	0.167342	0.156395	0.146302	0.136988	0.128384	0.120428	0.113065	0.106244	0.09992	0.0940506	0.0885988	0.0835304	0.0788145	0.0744229	0.0703299	0.0665121
	12.527	2.85344	2.55469	2.29136	2.05881	1.85307	1.67071	1.50879	1.36478	1.23647	1.12197	1.01961	0.927977	0.845808	0.772017	0.705649	0.645871	0.591951	0.543247	0.499193	0.459291	0.423103	0.39024	0.360358	0.333154	0.308356	0.285725	0.265047	0.246132	0.22881	0.212928	0.198351	0.184958	0.17264	0.161298	0.150844	0.141199	0.132293	0.12406	0.116442	0.109387	0.102847	0.0967793	0.0911449	0.085908	0.0810366	0.0765014	0.0722756	0.068335
	12.559	2.97951	2.66638	2.39049	2.14696	1.93158	1.74076	1.5714	1.42083	1.28672	1.1671	1.0602	0.964542	0.878795	0.801818	0.732611	0.670298	0.614112	0.563378	0.517505	0.47597	0.438313	0.404128	0.373055	0.344775	0.319005	0.295494	0.27402	0.254382	0.236403	0.219925	0.204805	0.190917	0.178147	0.166393	0.155563	0.145574	0.136352	0.127829	0.119946	0.112647	0.105883	0.099609	0.0937844	0.0883723	0.0833392	0.0786545	0.0742907	0.0702223
	12.5911	3.1121	2.7838	2.49467	2.23955	2.01402	1.81429	1.63709	1.47961	1.33941	1.21439	1.10273	1.00283	0.913325	0.833002	0.760814	0.69584	0.637276	0.584414	0.536633	0.493386	0.45419	0.41862	0.386299	0.356893	0.330105	0.305675	0.283367	0.262973	0.244308	0.227207	0.21152	0.197116	0.183875	0.171691	0.160467	0.150119	0.140568	0.131744	0.123584	0.116031	0.109033	0.102544	0.0965216	0.090927	0.0857256	0.0808856	0.0763781	0.0721769
	12.6232	3.2516	2.90729	2.60418	2.33684	2.10061	1.89148	1.70603	1.54127	1.39466	1.26397	1.14729	1.04294	0.949481	0.865643	0.790324	0.722556	0.661496	0.606401	0.556619	0.511577	0.470768	0.433747	0.400118	0.369533	0.341681	0.316287	0.293107	0.271923	0.252541	0.234788	0.218509	0.203565	0.189832	0.177199	0.165566	0.154843	0.144948	0.135809	0.127361	0.119543	0.112302	0.105589	0.0993607	0.0935762	0.0881996	0.0831979	0.078541	0.0742017
	12.6552	3.39841	3.03719	2.71934	2.43911	2.19159	1.97256	1.7784	1.60598	1.45261	1.31596	1.19399	1.08497	0.987352	0.89982	0.82121	0.750509	0.686828	0.629389	0.577508	0.530582	0.488082	0.44954	0.414542	0.382721	0.353754	0.327353	0.30326	0.28125	0.261118	0.242684	0.225785	0.210277	0.196031	0.182929	0.170868	0.159753	0.1495	0.140033	0.131284	0.12319	0.115696	0.10875	0.102306	0.096324	0.0907651	0.085595	0.0807827	0.0762997
	12.6873	3.55299	3.1739	2.84047	2.54664	2.28721	2.05774	1.85441	1.67392	1.51343	1.37049	1.24297	1.12902	1.02703	0.935615	0.853547	0.779764	0.713331	0.653431	0.599346	0.550445	0.506172	0.466035	0.429601	0.396486	0.366351	0.338894	0.313847	0.290972	0.270055	0.250908	0.233362	0.217265	0.202482	0.18889	0.176382	0.164859	0.154232	0.144423	0.13536	0.126978	0.119219	0.11203	0.105363	0.0991749	0.093426	0.0880808	0.0831066	0.078474
	12.7195	3.71577	3.31782	2.96794	2.65974	2.38775	2.14726	1.93426	1.74526	1.57727	1.42771	1.29434	1.1752	1.06862	0.973118	0.887415	0.810392	0.741067	0.678583	0.622185	0.571211	0.525077	0.483267	0.445328	0.410857	0.379498	0.350936	0.324889	0.301108	0.27937	0.259478	0.241255	0.224542	0.209197	0.195094	0.182119	0.170169	0.159152	0.148986	0.139596	0.130914	0.122879	0.115436	0.108536	0.102133	0.0961867	0.090659	0.0855164	0.0807281
	12.7516	3.88728	3.46938	3.10212	2.77875	2.49349	2.24138	2.01817	1.8202	1.64431	1.48778	1.34824	1.22364	1.11222	1.01242	0.922896	0.842467	0.770104	0.704905	0.646078	0.592927	0.54484	0.501276	0.461758	0.425865	0.393224	0.363503	0.336409	0.311679	0.289083	0.268411	0.249479	0.232122	0.21619	0.201553	0.18809	0.175694	0.16427	0.153731	0.143999	0.135003	0.126681	0.118974	0.111831	0.105204	0.0990516	0.0933339	0.0880158	0.0830655
	12.7838	4.06803	3.62904	3.24341	2.90402	2.60474	2.34036	2.10639	1.89895	1.71473	1.55084	1.40481	1.27447	1.15795	1.05363	0.96008	0.876069	0.800512	0.73246	0.671081	0.615644	0.565506	0.520101	0.478927	0.441543	0.407557	0.376622	0.348431	0.322708	0.299212	0.277724	0.258051	0.240019	0.223475	0.208278	0.194305	0.181444	0.169594	0.158666	0.148577	0.139255	0.130632	0.12265	0.115253	0.108393	0.102026	0.0961097	0.090609	0.0854899
	12.8159	4.25858	3.79728	3.39224	3.03591	2.72183	2.4445	2.19915	1.98173	1.78872	1.61708	1.4642	1.32781	1.20593	1.09684	0.999061	0.911282	0.832365	0.761314	0.697253	0.639415	0.587125	0.539786	0.496875	0.457926	0.42253	0.390322	0.360981	0.334218	0.309779	0.287437	0.266987	0.248251	0.231064	0.215283	0.200777	0.187429	0.175135	0.1638	0.153339	0.143675	0.134739	0.126469	0.118808	0.111705	0.105113	0.0989912	0.0933	0.0880051
	12.8481	4.45955	3.97465	3.54907	3.17483	2.84511	2.55409	2.29674	2.06878	1.86649	1.68668	1.52659	1.38381	1.25627	1.14217	1.03994	0.948195	0.865744	0.791539	0.724659	0.664298	0.609746	0.560377	0.515641	0.475051	0.438176	0.404633	0.374086	0.346233	0.320807	0.297569	0.276307	0.256833	0.238975	0.222582	0.207518	0.193662	0.180903	0.169143	0.158292	0.148272	0.139009	0.130439	0.122502	0.115146	0.10832	0.101983	0.0960934	0.0906153
	12.8803	4.67158	4.16169	3.71438	3.3212	2.97495	2.66946	2.39944	2.16035	1.94827	1.75984	1.59213	1.44262	1.30913	1.18975	1.08282	0.986902	0.900733	0.82321	0.753366	0.690353	0.633424	0.581923	0.535271	0.492957	0.454529	0.419587	0.387775	0.358779	0.332318	0.308142	0.28603	0.265782	0.247221	0.230189	0.214542	0.200154	0.186909	0.174704	0.163447	0.153055	0.143451	0.134567	0.126342	0.118721	0.111652	0.10509	0.0989938	0.0933248
	12.9125	4.89536	4.35902	3.8887	3.47549	3.11175	2.79096	2.50755	2.2567	2.03429	1.83675	1.66101	1.50441	1.36464	1.23969	1.12782	1.02751	0.937422	0.856408	0.783445	0.717643	0.658216	0.604474	0.55581	0.511686	0.471629	0.435217	0.402079	0.371884	0.344338	0.31918	0.296176	0.275118	0.255822	0.238119	0.221862	0.206917	0.193164	0.180495	0.168814	0.158032	0.148071	0.13886	0.130335	0.122437	0.115114	0.108318	0.102006	0.0961381
	12.9447	5.13163	4.56726	4.07259	3.63816	3.25592	2.91897	2.62139	2.35812	2.12479	1.91765	1.73343	1.56935	1.42295	1.29213	1.17506	1.07011	0.975906	0.891217	0.814973	0.746237	0.684183	0.628086	0.577307	0.531283	0.489514	0.45156	0.41703	0.385577	0.356893	0.330705	0.306766	0.284861	0.264793	0.246389	0.229494	0.213966	0.199682	0.186527	0.174401	0.163213	0.152879	0.143327	0.134488	0.126302	0.118713	0.111673	0.105136	0.09906
	12.9769	5.38117	4.7871	4.26663	3.80976	3.40794	3.05388	2.74133	2.46492	2.22006	2.00276	1.8096	1.63762	1.48424	1.34723	1.22466	1.11483	1.01629	0.927728	0.848031	0.776207	0.71139	0.652816	0.599815	0.551792	0.508226	0.468652	0.432661	0.399889	0.370012	0.342742	0.317825	0.29503	0.274155	0.255017	0.237452	0.221315	0.206474	0.192812	0.180221	0.168608	0.157885	0.147975	0.138808	0.130321	0.122455	0.11516	0.108388	0.102096
	13.0092	5.64483	5.01928	4.47148	3.99082	3.56827	3.19611	2.86772	2.57743	2.32037	2.09235	1.88974	1.70942	1.54866	1.40512	1.27676	1.1618	1.05867	0.966038	0.882704	0.80763	0.739905	0.678727	0.623388	0.573266	0.527811	0.486536	0.44901	0.414853	0.383723	0.35532	0.329375	0.305649	0.283927	0.264019	0.245754	0.228979	0.213555	0.199361	0.186285	0.174227	0.163096	0.152813	0.143304	0.134502	0.126347	0.118786	0.111768	0.10525
	13.0414	5.92351	5.26458	4.6878	4.18195	3.73745	3.34611	3.00096	2.69599	2.42604	2.18668	1.97409	1.78495	1.61641	1.46599	1.33152	1.21113	1.10318	1.00625	0.919083	0.840588	0.769803	0.705883	0.648085	0.595756	0.548315	0.505252	0.466115	0.430503	0.398058	0.368466	0.341443	0.316739	0.29413	0.273416	0.254417	0.236973	0.22094	0.206189	0.192604	0.180081	0.168525	0.157851	0.147984	0.138853	0.130396	0.122557	0.115283	0.108529
	13.0737	6.21819	5.52384	4.91634	4.38378	3.91601	3.50438	3.14148	2.82097	2.53738	2.28604	2.06289	1.86445	1.68769	1.52999	1.38907	1.26296	1.14993	1.04847	0.957267	0.875167	0.801159	0.734354	0.67397	0.619317	0.569789	0.524847	0.484017	0.446876	0.413051	0.38221	0.354056	0.328327	0.304788	0.283228	0.263459	0.245315	0.228643	0.21331	0.199192	0.186182	0.17418	0.163099	0.152857	0.143382	0.13461	0.12648	0.118939	0.111939
	13.1059	6.5299	5.79797	5.15787	4.59699	4.10457	3.67143	3.28974	2.95277	2.65475	2.39073	2.15643	1.94815	1.7627	1.59732	1.4496	1.31745	1.19905	1.09282	0.997358	0.911461	0.834058	0.764215	0.701107	0.644011	0.592287	0.545369	0.502759	0.464012	0.428737	0.396584	0.367244	0.340439	0.315923	0.293476	0.272901	0.254022	0.236682	0.220738	0.206063	0.192543	0.180075	0.168566	0.157932	0.148098	0.138996	0.130562	0.122742	0.115485
	13.1382	6.85976	6.08792	5.41323	4.82231	4.30374	3.84781	3.44621	3.09181	2.77852	2.50109	2.25498	2.0363	1.84167	1.66817	1.51327	1.37474	1.25068	1.13941	1.03947	0.949567	0.868587	0.795543	0.729569	0.6699	0.615865	0.566869	0.522387	0.481952	0.445153	0.411623	0.381036	0.353101	0.327561	0.304183	0.282763	0.263114	0.245072	0.228488	0.21323	0.199176	0.18622	0.174264	0.163221	0.153011	0.143563	0.134812	0.1267	0.119174
	13.1704	7.20895	6.39473	5.68332	5.06052	4.51422	4.03412	3.61141	3.23856	2.90909	2.61745	2.35886	2.12918	1.92485	1.74277	1.58027	1.43501	1.30498	1.18839	1.08371	0.98959	0.904839	0.828423	0.759429	0.697052	0.640584	0.589401	0.54295	0.50074	0.462339	0.427362	0.395465	0.366344	0.339728	0.315374	0.293066	0.27261	0.253833	0.236579	0.220708	0.206096	0.192628	0.180204	0.168732	0.158129	0.14832	0.139238	0.130821	0.123014
	13.2027	7.57877	6.71951	5.9691	5.31245	4.73672	4.23099	3.78591	3.39349	3.04688	2.74021	2.46839	2.22708	2.01248	1.82133	1.6508	1.49844	1.36209	1.23989	1.13022	1.03164	0.942915	0.862945	0.790767	0.725537	0.666508	0.613023	0.5645	0.520424	0.480338	0.443839	0.410566	0.380199	0.352453	0.327074	0.303835	0.282532	0.262984	0.245027	0.228515	0.213316	0.199314	0.1864	0.174479	0.163464	0.153277	0.143848	0.135112	0.127011
	13.2349	7.97059	7.06346	6.2716	5.57901	4.97204	4.4391	3.97028	3.55712	3.19236	2.86975	2.58394	2.3303	2.10484	1.9041	1.72509	1.5652	1.42219	1.29406	1.17912	1.07584	0.982921	0.899202	0.823669	0.755433	0.693706	0.637797	0.587093	0.541052	0.499194	0.461095	0.426375	0.394699	0.365767	0.339311	0.315094	0.292902	0.272545	0.25385	0.236666	0.220854	0.20629	0.192862	0.180471	0.169025	0.158443	0.148651	0.139581	0.131173
	13.2672	8.38588	7.42784	6.59194	5.86115	5.221	4.65918	4.16518	3.73002	3.346	3.00651	2.70587	2.43918	2.20222	1.99133	1.80335	1.63552	1.48545	1.35107	1.23055	1.12232	1.02497	0.937296	0.858226	0.78682	0.722251	0.663788	0.610787	0.562678	0.518956	0.479173	0.442932	0.409879	0.3797	0.352114	0.32687	0.303745	0.282538	0.26307	0.24518	0.228724	0.213572	0.199606	0.186723	0.174826	0.16383	0.153657	0.144238	0.135509
	13.2994	8.82623	7.81404	6.93129	6.15991	5.48451	4.89202	4.37129	3.91278	3.50833	3.15094	2.83458	2.55408	2.30494	2.08331	1.88583	1.70959	1.55208	1.41108	1.28468	1.1712	1.06918	0.977335	0.894533	0.819785	0.752219	0.691065	0.635645	0.585358	0.539673	0.498119	0.460278	0.425778	0.394287	0.365513	0.33919	0.315084	0.292986	0.272706	0.254076	0.236945	0.221176	0.206646	0.193246	0.180877	0.169447	0.158876	0.149092	0.140026
	13.3316	9.29336	8.22352	7.29095	6.47639	5.76353	5.13846	4.58933	4.10604	3.67992	3.30354	2.97052	2.67537	2.41333	2.18032	1.97279	1.78766	1.62227	1.47427	1.34165	1.22264	1.11569	1.01943	0.932694	0.854421	0.783694	0.719703	0.661734	0.609153	0.561401	0.517982	0.478457	0.442434	0.409565	0.37954	0.352084	0.326949	0.303914	0.282781	0.263375	0.245535	0.229118	0.213998	0.200057	0.187191	0.175307	0.16432	0.154152	0.144735
	13.3637	9.7891	8.65789	7.67228	6.8118	6.05909	5.39939	4.8201	4.31049	3.86136	3.46484	3.11414	2.80346	2.52775	2.28269	2.06452	1.86998	1.69624	1.54084	1.40165	1.27679	1.16462	1.06372	0.972819	0.890824	0.816764	0.749782	0.689124	0.634126	0.584196	0.538814	0.497515	0.459889	0.42557	0.394232	0.365583	0.339366	0.315347	0.293319	0.273097	0.254513	0.237418	0.221677	0.207168	0.193783	0.181423	0.169999	0.159431	0.149645
	13.3958	10.3154	9.11883	8.07675	7.16741	6.37231	5.67578	5.06444	4.52686	4.0533	3.63539	3.26595	2.93879	2.64859	2.39076	2.16131	1.9568	1.77423	1.61101	1.46486	1.33381	1.21613	1.11031	1.01502	0.929101	0.851522	0.781384	0.717892	0.660345	0.60812	0.560669	0.517504	0.47819	0.442345	0.409624	0.379722	0.352366	0.327313	0.304345	0.283266	0.263901	0.246093	0.229701	0.214597	0.200667	0.187808	0.175926	0.164938	0.154766
	13.4278	10.8744	9.6082	8.50597	7.54459	6.70439	5.96868	5.32324	4.75595	4.25644	3.81581	3.42646	3.08182	2.77625	2.50488	2.26348	2.04841	1.85649	1.68498	1.53148	1.39388	1.27038	1.15936	1.05943	0.969363	0.888069	0.8146	0.748118	0.687882	0.633239	0.583607	0.538474	0.497384	0.459932	0.425756	0.394535	0.365982	0.339842	0.315885	0.293905	0.27372	0.255164	0.238088	0.22236	0.207858	0.194476	0.182114	0.170685	0.160109
	13.4595	11.4685	10.128	8.96164	7.94483	7.0566	6.2792	5.5975	4.99861	4.4715	4.00675	3.59625	3.23306	2.91118	2.62544	2.37137	2.14511	1.94329	1.763	1.60171	1.45719	1.32753	1.21102	1.10618	1.01173	0.926512	0.849526	0.779888	0.716816	0.659621	0.607691	0.560485	0.517522	0.478377	0.442669	0.41006	0.380248	0.352964	0.327967	0.305042	0.283994	0.264652	0.246859	0.230474	0.215373	0.201441	0.188576	0.176685	0.165685
	13.4906	12.1	10.6803	9.44559	8.36972	7.43034	6.60855	5.88825	5.25574	4.6993	4.2089	3.77594	3.39305	3.05385	2.75287	2.48536	2.24723	2.03492	1.84533	1.67579	1.52394	1.38776	1.26544	1.15542	1.05633	0.966964	0.886264	0.813294	0.747229	0.687341	0.632986	0.583594	0.538659	0.49773	0.460409	0.426338	0.3952	0.366713	0.340623	0.316702	0.294749	0.27458	0.256033	0.238959	0.223228	0.20872	0.195327	0.182952	0.171507
[truncated: 52 more columns]
